# Supplementary material for: The acid promoted Petasis reaction of organotrifluoroborates with imines and enamines
Source: Royal Society of Chemistry journal article supplement (doi:10.1039/c7cc04397j), 2017-01-01
Supplement: c7cc04397j1.pdf [file c7cc04397j1.pdf]

## The Acid Promoted Addition of Organotrifluoroborates to Unactivated Electrophiles

Diane E. Carrera<sup>†,\*</sup>

<sup>†</sup>Merck Center for Catalysis at Princeton University, Princeton, New Jersey 08544, United States

Current Address: Small Molecule Process Chemistry, Genentech, Inc., 1 DNA Way, South San Francisco, CA 94080.

### Supporting Information

**General Information.** Commercially available organotrifluoroborates and trifluoroacetic acid were used without any further purification. Aromatic imines were prepared according to the procedure of Jacobsen<sup>1</sup> while enamines were prepared according to the method of Terada<sup>2</sup>. All solvents were purified according to the method of Grubbs.<sup>3</sup> Organic solutions were concentrated under reduced pressure on a Büchi rotary evaporator. Chromatographic purification of products was accomplished using flash chromatography on Silicycle 230-400 mesh silica gel. Thin-layer chromatography (TLC) was carried out on Silicycle 0.25mm silica gel plates. Visualization of the developed chromatogram was performed by fluorescence quenching or CAM staining.

<sup>1</sup>H and <sup>13</sup>C NMR spectra were recorded on Varian Mercury 300, 400 and Bruker 500 Spectrometers, and are internally referenced to residual protic solvent signals (CHCl<sub>3</sub> = 7.24 ppm). Data for <sup>1</sup>H are reported as follows: chemical shift (δ ppm), multiplicity (s = singlet, d = doublet, t = triplet, q = quartet, m = multiplet), integration, coupling constant (Hz) and assignment. Data for <sup>13</sup>C NMR are reported in terms of chemical shift. IR spectra were recorded on a Perkin Elmer Paragon 1000 spectrometer and are reported in terms of frequency of absorption (cm<sup>-1</sup>). Mass spectra were obtained from the Princeton Mass Spectroscopy Facility. Gas liquid chromatography (GLC) was carried out on a Hewlett-Packard 6850 Series gas chromatograph equipped with a splitmode capillary injection system and flame ionization detectors using a Varian HP-1 column (30

<sup>1</sup> Jacobsen, E. N; Wenzel, A. G. *J. Am. Chem. Soc.* **2002**, *124*, 12964.

<sup>2</sup> Terada, M.; Sorimachi, K. *J. Am. Chem. Soc.* **2007**, *129*, 292.

<sup>3</sup> Pangborn, A. B; Giardello, M.A.; Grubbs, R. H.; Rosen, R.K.; Timmers, F.J. *Organometallics* **1996**, *15*, 1518.

m x 0.25 mm).

**General Procedure:** A 20 mL oven dried vial equipped with a magnetic stir bar was charged with imine (0.952 mmol, 2.0 equiv) and acetonitrile (4.8mL, 0.1M) was added. Potassium organotrifluoroborate (0.476 mmol, 1.0 equiv) was added followed by dropwise addition of either trifluoroacetic or dichloroacetic acid (0.476 mmol, 1.0 equiv) and the reaction was stirred at room temperature (23 °C) until completion as determined by TLC monitoring. The crude reaction mixture was poured into a separatory funnel containing NaHCO<sub>3</sub> (sat. aq.) and extracted with CH<sub>2</sub>Cl<sub>2</sub> (3 × 25 mL). The combined organic phase was dried (Na<sub>2</sub>SO<sub>4</sub>) and concentrated *in vacuo*. The product was purified by silica gel chromatography (solvents noted) to yield the title compounds.

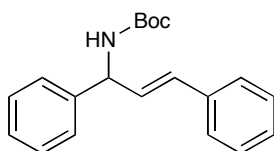

**(E)-tert-butyl 1,3-diphenylallylcarbamate (Table 2, entry 1):** Prepared according to the general procedure from potassium *trans*-styryltrifluoroborate (100 mg, 0.476 mmol) and benzaldehyde *N*-(*tert*-butoxycarbonyl)imine (195 mg, 0.952 mmol) at 23 °C for 4 h to provide the title compound as a white solid (139 mg, 94% yield) following silica gel chromatography (5% Et<sub>2</sub>O/petroleum ether, R<sub>f</sub> = 0.22 in 5% Et<sub>2</sub>O/petroleum ether). IR (film) 3376, 2976, 2926, 1680, 1502, 1456, 1362, 1295, 1234, 1163, 1156, 1025, 1039, 1012, 967, 886, 767, 738, 705 cm<sup>-1</sup>; <sup>1</sup>H NMR (400 MHz, CDCl<sub>3</sub>) δ 1.46 (s, 9H, -C(CH<sub>3</sub>)<sub>3</sub>), 4.98 (brs, 1H, -CHNH), 5.48 (brs, 1H, -CHNH), 6.33 (dd, 1H *J* = 6.4, 16 Hz, -CHCHC<sub>6</sub>H<sub>5</sub>), 6.55 (d, 1H, *J* = 15.6 Hz, -CHCHC<sub>6</sub>H<sub>5</sub>), 7.39-7.24 (m, 10H, ArH); <sup>13</sup>C NMR (125 MHz, CDCl<sub>3</sub>) δ 27.27, 28.40, 126.54, 127.01, 127.58, 127.72, 128.56, 128.75, 129.59, 130.93; HRMS (EI) exact mass calculated for (C<sub>20</sub>H<sub>23</sub>NO<sub>2</sub>) requires *m/z* 332.16265, found *m/z* 332.16222 [M+Na]<sup>+</sup>.

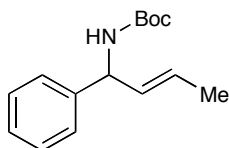

**(E)-tert-butyl 1-phenylbut-2-enylcarbamate (Table 2, entry 2):** Prepared according to the general procedure from potassium *trans*-methylvinyltrifluoroborate (100 mg, 0.676 mmol) and benzaldehyde *N*-(*tert*-butoxycarbonyl)imine (277 mg, 1.35 mmol) at 23 °C for 4 h to provide the title compound as a white solid (105 mg, 63% yield) following silica gel chromatography (3% Et<sub>2</sub>O/petroleum ether, R<sub>f</sub> = 0.28 in 5% Et<sub>2</sub>O/petroleum ether). IR (film) 3354, 2979, 2934, 1682, 1513, 1494, 1449, 1389, 1364, 1293, 1246, 1165, 1041, 1016, 966, 744 cm<sup>-1</sup>; <sup>1</sup>H NMR (400 MHz, CDCl<sub>3</sub>) δ 1.44 (s, 9H, -C(CH<sub>3</sub>)<sub>3</sub>), 1.78 (d, 3H, *J* = 4.8 Hz, -CH<sub>3</sub>), 4.86 (brs, 1H, -CHNH), 5.22 (brs, 1H, -CHNH), 5.64-5.60 (m, 2H, -CHCHCH<sub>3</sub>), 7.36-7.24 (m, 5H, ArH); <sup>13</sup>C NMR (125 MHz, CDCl<sub>3</sub>) δ 17.74, 18.00, 28.17, 28.39, 56.19, 125.43, 126.79, 127.25, 128.55, 131.13; HRMS (EI) exact mass calculated for (C<sub>15</sub>H<sub>21</sub>NO<sub>2</sub>) requires *m/z* 270.14700 found *m/z* 270.14649 [M+Na]<sup>+</sup>.

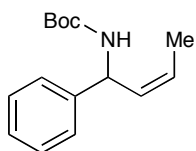

**(Z)-tert-butyl 1-phenylbut-2-enylcarbamate (Table 2, entry 3):** Prepared according to the general procedure from potassium *cis*-methylvinyltrifluoroborate (57.0 mg, 0.385 mmol) and benzaldehyde *N*-(*tert*-butoxycarbonyl)imine (158 mg, 0.770 mmol) at 23 °C for 4 h to provide the title compound as a white solid (64.9 mg, 68% yield) following silica gel chromatography (3% Et<sub>2</sub>O/petroleum ether, R<sub>f</sub> = 0.28 in 5% Et<sub>2</sub>O/petroleum ether). IR (film) 3356, 2976, 2920, 1688, 1510, 1389, 1360, 1230, 1165, 1040, 1018, 799, 755, 697 cm<sup>-1</sup>; <sup>1</sup>H NMR (300 MHz, CDCl<sub>3</sub>) δ 1.44 (s, 9H, -C(CH<sub>3</sub>)<sub>3</sub>), 1.77 (d, 3H, *J* = 6.3 Hz, -CH<sub>3</sub>), 4.83 (brs, 1H, -CHNH), 5.46-5.70 (m, 3H, -CHNH, -CHCHCH<sub>3</sub>), 7.22-7.36 (m, 5H, ArH); <sup>13</sup>C NMR (125 MHz, CDCl<sub>3</sub>) δ 13.40, 17.74, 28.41, 126.34, 126.80, 127.14, 128.62, 130.74; HRMS (EI) exact mass calculated for (C<sub>15</sub>H<sub>21</sub>NO<sub>2</sub>) requires *m/z* 270.14700 found *m/z* 270.14636 [M+Na]<sup>+</sup>.

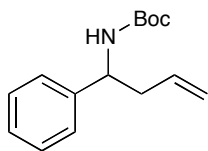

**tert-butyl 1-phenylbut-3-enylcarbamate (Table 2, entry 4):** To a solution of potassium allyltrifluoroborate (60.0 mg, 0.405 mmol) and benzaldehyde *N*-(*tert*-butoxycarbonyl)imine (108 mg, 0.527 mmol) in acetonitrile (8.1mL, 0.05M) at 0 °C was added dropwise trifluoroacetic acid (30  $\mu$ L, .405 mmol). The reaction was let come to 23 °C and stirred for 1 h to provide the title compound as a white solid (85.0 mg, 85% yield) following standard workup procedure and silica gel chromatography (5% Et<sub>2</sub>O/hexanes, R<sub>f</sub> = 0.35 in 5% Et<sub>2</sub>O/petroleum ether). <sup>1</sup>H NMR and <sup>13</sup>C NMR data in accord with literature values.<sup>4</sup>

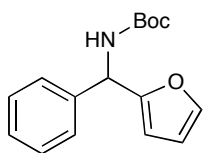

**tert-butyl furan-2-yl(phenyl)methylcarbamate (Table 2, entry 5):** Prepared according to the general procedure from potassium 2-furantrifluoroborate (127.1 mg, 0.731 mmol) and benzaldehyde *N*-(*tert*-butoxycarbonyl)imine (100 mg, 0.487 mmol) in acetonitrile (1.9mL, 0.25M) at 23 °C for 24 h to provide the title compound as a white solid (109 mg, 82% yield) following silica gel chromatography (5% Et<sub>2</sub>O/petroleum ether, R<sub>f</sub> = 0.26 in 5% Et<sub>2</sub>O/petroleum ether). IR (film) 3367, 2979, 2932, 1687, 1515, 1499, 1457, 1389, 1368, 1299, 1241, 1168, 1149, 1130, 1076, 1043, 1021, 1006, 946, 872, 753 cm<sup>-1</sup>; <sup>1</sup>H NMR (500 MHz, CDCl<sub>3</sub>)  $\delta$  1.41 (s, 9H, -C(CH<sub>3</sub>)<sub>3</sub>), 5.96 (brd, 1H, *J* = 8.5 Hz, -CHNH), 6.17 (d, 1H, *J* = 3.0 Hz, ArH), 6.35 (t, 1H, *J* = 3.0 Hz, ArH), 6.90 (brs, 1H, -CHNH), 7.30 (m, 1H, ArH), 7.33-7.38 (m, 4H, ArH), 7.47 (s, 1H, ArH); <sup>13</sup>C NMR (125 MHz, CDCl<sub>3</sub>)  $\delta$  28.38, 52.66, 107.32, 110.24, 126.93, 127.74, 128.62, 142.39; HRMS (EI) exact mass calculated for (C<sub>16</sub>H<sub>19</sub>NO<sub>3</sub>) requires *m/z* 273.13649 found *m/z* 273.13719 [M+Na]<sup>+</sup>.

<sup>4</sup> Vilaivan, T.; Winotapan, C.; Banphavichit, V.; Shinada, T.; Ohfune, Y. *J. Org. Chem.* **2005**, *70*, 3464.

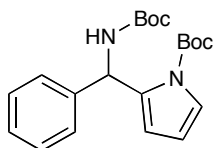

***tert*-butyl-2[(*tert*-butyl-carbonylamino)-phenylmethyl]-1H-pyrrole-1-carboxylate**

(Table 2, entry 6): Prepared according to the general procedure from potassium 2-*N*-Boc-pyrroletetrafluoroborate (96.1 mg, 0.352 mmol) and benzaldehyde *N*-(*tert*-butoxycarbonyl)imine (108 mg, 0.528 mmol) in acetonitrile (2.3 mL, 0.15M) at  $-20\text{ }^{\circ}\text{C}$  for 24 h to provide the title compound as a white solid (95.4 mg, 73% yield) following silica gel chromatography (5% Et<sub>2</sub>O/petroleum ether, R<sub>f</sub> = 0.20 in 5% Et<sub>2</sub>O/petroleum ether). IR (film) 3434, 2976, 2933, 1738, 1714, 1486, 1368, 1332, 1258, 1164, 1142, 1113, 1066, 1044, 1018, 882, 847, 770, 728, 700 cm<sup>-1</sup>; <sup>1</sup>H NMR (400 MHz, CDCl<sub>3</sub>) δ 1.39 (s, 9H, -C(CH<sub>3</sub>)<sub>3</sub>), 1.48 (s, 9H, -C(CH<sub>3</sub>)<sub>3</sub>), 5.75 (brs, 1H, -CHNH), 6.15 (t, 1H, *J* = 3.2 Hz, ArH), 6.26 (brs, 1H, -CHNH), 6.38 (brd, 1H, *J* = 9.2 Hz, ArH), 7.12-7.29 (m, 6H, ArH); <sup>13</sup>C NMR (125 MHz, CDCl<sub>3</sub>) δ 27.69, 27.97, 28.48, 52.26, 109.95, 114.26, 122.56, 126.52, 126.93, 128.16, 132.15; HRMS (EI) exact mass calculated for (C<sub>21</sub>H<sub>28</sub>N<sub>2</sub>O<sub>2</sub>) requires *m/z* 411.16861 found *m/z* 411.18898 [M+K]<sup>+</sup>.

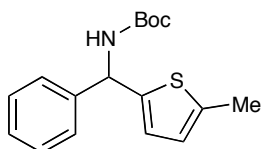

***tert*-butyl(5-methylthiophen-2-yl)(phenyl)methylcarbamate**

(Table 2, entry 7): Prepared according to the general procedure from potassium 2-(5-methyl)thiophenetrifluoroborate (102.8 mg, 0.501 mmol) and benzaldehyde *N*-(*tert*-butoxycarbonyl)imine (154.2 mg, 0.751 mmol) at  $-20\text{ }^{\circ}\text{C}$  for 24 h to provide the title compound as a white solid (120.4 mg, 79% yield) following silica gel chromatography (5% Et<sub>2</sub>O/petroleum ether, R<sub>f</sub> = 0.32 in 5% Et<sub>2</sub>O/petroleum ether). IR (film) 3383, 2976, 2933, 1679, 1510, 1456, 1366, 1295, 1249, 1165, 1153, 1011, 869, 842, 757, 712 cm<sup>-1</sup>; <sup>1</sup>H NMR (400 MHz, CDCl<sub>3</sub>) δ 1.45 (s, 9H, -C(CH<sub>3</sub>)<sub>3</sub>), 2.43 (s, 3H, -CH<sub>3</sub>), 5.22 (brs, 1H, -CHNH), 6.03 (brs, 1H, -CHNH), 6.57 (m, 2H, ArH), 7.27-7.37 (m, 5H, ArH); <sup>13</sup>C NMR (125 MHz, CDCl<sub>3</sub>) δ 15.36, 28.37, 54.57, 119.72, 124.74, 125.10, 125.30, 126.82,

126.97, 127.40, 127.65, 128.59; HRMS (EI) exact mass calculated for (C<sub>17</sub>H<sub>21</sub>NO<sub>2</sub>S) requires  $m/z$  326.11907 found  $m/z$  326.11847 [M+Na]<sup>+</sup>.

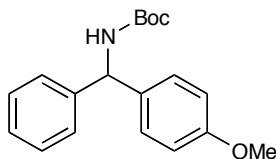

**tert-butyl (4-methoxyphenyl)(phenyl)-1-methylcarbamate (Table 2, entry 8):** To a solution of potassium 4-methoxyphenyltrifluoroborate (192.0 mg, 0.934 mmol) and benzaldehyde *N*-(*tert*-butoxycarbonyl)imine (100 mg, 0.467 mmol) at 23 °C was added dropwise dichloroacetic acid (115 μL, 1.40 mmol). The reaction was stirred for 24 h to provide the title compound as a white solid (115.7 mg, 79% yield) following standard workup procedure and silica gel chromatography (5% Et<sub>2</sub>O/hexanes, R<sub>f</sub> = 0.22 in 5% Et<sub>2</sub>O/petroleum ether). <sup>1</sup>H NMR and <sup>13</sup>C NMR data in accord with literature values.<sup>5</sup>

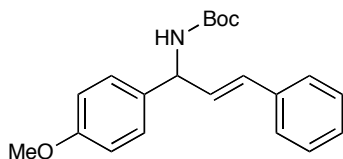

**(E)-tert-butyl 1-(4-methoxyphenyl)-3-phenylallylcarbamate (Table 3, entry 1):**

Prepared according to the general procedure from potassium *trans*-styryltrifluoroborate (100 mg, 0.476 mmol) and 4-methoxybenzaldehyde *N*-(*tert*-butoxycarbonyl)imine (224 mg, 0.952 mmol) at 23 °C for 24 h to provide the title compound as a white solid (126.6 mg, 78% yield) following silica gel chromatography (5–10% Et<sub>2</sub>O/petroleum ether, R<sub>f</sub> = 0.22 5% Et<sub>2</sub>O/petroleum ether). IR (film) 3362, 2978, 2932, 2834, 1682, 1608, 1507, 1461, 1447, 1364, 1298, 1161, 1030, 965, 885, 857, 830, 748, 727, 694 cm<sup>-1</sup>; <sup>1</sup>H NMR (500 MHz, CDCl<sub>3</sub>) δ 1.46 (s, 9H, -C(CH<sub>3</sub>)<sub>3</sub>), 3.82 (s, 3H, -OCH<sub>3</sub>), 4.93 (brs, 1H, -CHNH), 5.43 (brs, 1H, -CHNH), 6.32 (dd, 1H *J* = 5, 15 Hz, -CHCHC<sub>6</sub>H<sub>5</sub>), 6.53 (d, 1H, *J* = 15 Hz, -CHCHC<sub>6</sub>H<sub>5</sub>), 6.90 (d, 2H, *J* = 5Hz, ArH), 7.31-7.23 (m, 5H, ArH), 7.37-7.39 (m, 2H, ArH); <sup>13</sup>C NMR (125 MHz, CDCl<sub>3</sub>) δ 28.45, 55.36, 114.12, 114.39, 126.55, 127.67, 128.25, 128.58, 129.82, 130.66, 132.05, 133.55, 136.67, 159.03; HRMS (EI)

<sup>5</sup> Ellman, J. A.; Nakagawa, H.; Rech, J. C.; Sindelar, R. W. *Org. Lett.* **2007**, *9*, 5155.

exact mass calculated for (C<sub>21</sub>H<sub>25</sub>NO<sub>3</sub>) requires *m/z* 339.18344, found *m/z* 362.17285 [M+Na]<sup>+</sup>.

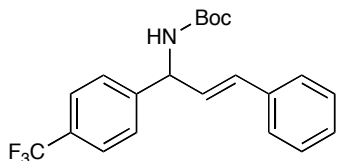

**(E)-tert-butyl 1-(4-trifluoromethylphenyl)-3-phenylallylcarbamate (Table 3, entry 2):**

Prepared according to the general procedure from potassium *trans*-styryltrifluoroborate (100 mg, 0.476 mmol) and 4-trifluoromethylbenzaldehyde *N*-(*tert*-butoxycarbonyl)imine (260 mg, 0.952 mmol) at 23 °C for 4 h to provide the title compound as a white solid (148.9 mg, 83% yield) following silica gel chromatography (5–10% Et<sub>2</sub>O/petroleum ether, R<sub>f</sub> = 0.24 5% Et<sub>2</sub>O/petroleum ether). IR (film) 3363, 2980, 1683, 1619, 1513, 1448, 1421, 1390, 1366, 1323, 1296, 1158, 1120, 1108, 1067, 1017, 961, 896, 867, 840, 780, 767, 689 cm<sup>-1</sup>; <sup>1</sup>H NMR (500 MHz, CDCl<sub>3</sub>) δ 1.48 (s, 9H, -C(CH<sub>3</sub>)<sub>3</sub>), 5.05 (brs, 1H, -CHNH), 5.54 (brs, 1H, -CHNH), 6.33 (dd, 1H *J* = 20, 10 Hz, -CHCHC<sub>6</sub>H<sub>5</sub>), 6.55 (d, 1H, *J* = 20 Hz, -CHCHC<sub>6</sub>H<sub>5</sub>), 7.28 (m, 1H, ArH), 7.34 (m, 2H, ArH), 7.39 (m, 2H, ArH), 7.50 (d, 2H, *J* = 10 Hz, ArH), 7.65 (d, 2H, *J* = 10 Hz, ArH); <sup>13</sup>C NMR (125 MHz, CDCl<sub>3</sub>) δ 28.38, 56.10, 65.92, 125.71, 125.74, 126.58, 127.23, 128.11, 128.40, 128.68, 132.13; HRMS (EI) exact mass calculated for (C<sub>21</sub>H<sub>22</sub>F<sub>3</sub>NO<sub>2</sub>) requires *m/z* 377.16026, found *m/z* 400.14942 [M+Na]<sup>+</sup>.

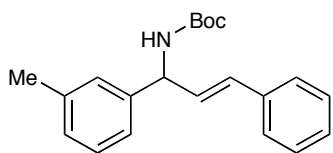

**(E)-tert-butyl 1-(3-methylphenyl)-3-phenylallylcarbamate (Table 3, entry 3):**

Prepared according to the general procedure from potassium *trans*-styryltrifluoroborate (100 mg, 0.476 mmol) and 3-methylbenzaldehyde *N*-(*tert*-butoxycarbonyl)imine (209 mg, 0.952 mmol) at 23 °C for 4 h to provide the title compound as a white solid (145.6 mg, 95% yield) following silica gel chromatography (5–10% Et<sub>2</sub>O/petroleum ether, R<sub>f</sub> =

0.25 in 5% Et<sub>2</sub>O/petroleum ether). IR (film) 3343, 2978, 2933, 1678, 1606, 1511, 1448, 1391, 1366, 1333, 1281, 1252, 1164, 1040, 1017, 968, 865, 836, 780, 765, 736, 694 cm<sup>-1</sup>; <sup>1</sup>H NMR (500 MHz, CDCl<sub>3</sub>) δ 1.46 (s, 9H, -C(CH<sub>3</sub>)<sub>3</sub>), 2.36 (s, 3H, -CH<sub>3</sub>), 4.96 (brs, 1H, -CHNH), 5.43 (brs, 1H, -CHNH), 6.32 (dd, 1H *J* = 5, 15 Hz, -CHCHC<sub>6</sub>H<sub>5</sub>), 6.55 (d, 1H, *J* = 15 Hz, -CHCHC<sub>6</sub>H<sub>5</sub>), 7.11 (m, 1H, ArH), 7.15 (m, 2H, ArH), 7.25 (m, 2H, ArH), 7.32 (m, 2H, ArH), 7.39 (m, 2H, ArH); <sup>13</sup>C NMR (125 MHz, CDCl<sub>3</sub>) δ 21.52, 28.43, 56.31, 65.92, 124.02, 126.56, 127.69, 127.77, 128.37, 128.57, 128.68, 129.72, 130.66; HRMS (EI) exact mass calculated for (C<sub>21</sub>H<sub>25</sub>NO<sub>2</sub>) requires *m/z* 323.18853, found *m/z* 346.17758 [M+Na]<sup>+</sup>.

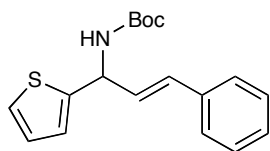

**(E)-tert-butyl 1-(2-thiophenyl)-3-phenylallylcarbamate (Table 3, entry 4):**

Prepared according to the general procedure from potassium *trans*-styryltrifluoroborate (100 mg, 0.476 mmol) and thiophene-2-carboxaldehyde *N*-(*tert*-butoxycarbonyl)imine (203 mg, 0.952 mmol) at 23 °C for 24 h to provide the title compound as a white solid (134.1 mg, 99% yield) following silica gel chromatography (3–10% Et<sub>2</sub>O/petroleum ether, R<sub>f</sub> = 0.30 in 5% Et<sub>2</sub>O/petroleum ether). IR (film) 3348, 2979, 2932, 1692, 1493, 1390, 1366, 1300, 1234, 1155, 1045, 1017, 964, 878, 846, 827, 765, 752, 742 cm<sup>-1</sup>; <sup>1</sup>H NMR (500 MHz, CDCl<sub>3</sub>) δ 1.48 (s, 9H, -C(CH<sub>3</sub>)<sub>3</sub>), 5.02 (brs, 1H, -CHNH), 5.71 (brs, 1H, -CHNH), 6.36 (dd, 1H *J* = 6, 16 Hz, -CHCHC<sub>6</sub>H<sub>5</sub>), 6.65 (d, 1H, *J* = 16 Hz, -CHCHC<sub>6</sub>H<sub>5</sub>), 6.98 (m, 2H, ArH), 7.25 (m, 2H, ArH), 7.33 (m, 2H, ArH), 7.40 (m, 2H, ArH); <sup>13</sup>C NMR (125 MHz, CDCl<sub>3</sub>) δ 28.41, 52.12, 124.77, 124.93, 126.68, 127.03, 127.91, 128.62, 128.67, 131.31, 136.37, 145.45, 154.79; HRMS (EI) exact mass calculated for (C<sub>18</sub>H<sub>21</sub>NO<sub>2</sub>S) requires *m/z* 315.1293, found *m/z* 315.12976 [M+Na]<sup>+</sup>.

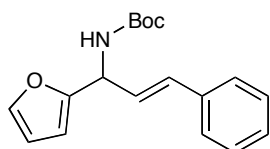



**(E)-tert-butyl 1-(2-furanyl)-3-phenylallylcarbamate (Table 3, entry 5):**

Prepared according to the general procedure from potassium *trans*-styryltrifluoroborate (53.8 mg, 0.256 mmol) and furfural *N*-(*tert*-butoxycarbonyl)imine (75.0 mg, 0.384 mmol) at  $-10\text{ }^{\circ}\text{C}$  for 5 h to provide the title compound as a white solid (49.9 mg, 65% yield) following silica gel chromatography (10–20% Et<sub>2</sub>O/petroleum ether,  $R_f = 0.20$  in 10% Et<sub>2</sub>O/petroleum ether). IR (film) 3360, 2975, 2933, 1685, 1513, 1499, 1389, 1364, 1308, 1240, 1163, 1152, 1076, 1044, 1011, 962, 950, 877, 862, 692  $\text{cm}^{-1}$ ; <sup>1</sup>H NMR (500 MHz, CDCl<sub>3</sub>)  $\delta$  1.48 (s, 9H, -C(CH<sub>3</sub>)<sub>3</sub>), 5.05 (brs, 1H, -CHNH), 5.59 (brs, 1H, -CHNH), 6.25 (d, 1H,  $J = 4$  Hz, ArH) 6.30-6.35 (m, 2H, ArH, -CHCHC<sub>6</sub>H<sub>5</sub>), 6.58 (d, 1H,  $J = 16$  Hz, -CHCHC<sub>6</sub>H<sub>5</sub>), 7.25 (d, 1H,  $J = 7$  Hz, ArH), 7.32 (t, 2H,  $J = 7$  Hz, ArH), 7.39 (m, 3H, ArH); <sup>13</sup>C NMR (125 MHz, CDCl<sub>3</sub>)  $\delta$  28.42, 106.63, 110.34, 126.64, 126.97, 127.86, 128.59, 131.35, 136.49, 142.33, 153.53, 154.91; HRMS (EI) exact mass calculated for (C<sub>18</sub>H<sub>21</sub>NO<sub>3</sub>) requires  $m/z$  299.15214, found  $m/z$  299.15316 [M+Na]<sup>+</sup>.

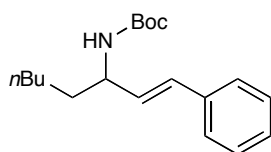**(E)-tert-butyl 1-phenyloct-1-en-3-ylcarbamate (Table 3, entry 6):**

Prepared according to the general procedure from potassium *trans*-styryltrifluoroborate (100 mg, 0.476 mmol) and *tert*-butyl hex-1-enylcarbamate (mixture of *E* & *Z* isomers) (190.0 mg, 0.952 mmol) at  $23\text{ }^{\circ}\text{C}$  for 4 h to provide the title compound as a clear oil (137.1 mg, 94% yield) following silica gel chromatography (2.5% EtOAc/petroleum ether,  $R_f = 0.34$  in 5% Et<sub>2</sub>O/petroleum ether). IR (film) 3363, 2955, 2929, 2858, 1683, 1512, 1453, 1390, 1369, 1303, 1277, 1246, 1165, 1116, 1042, 1017, 964, 864, 777, 747, 693  $\text{cm}^{-1}$ ; <sup>1</sup>H NMR (400 MHz, CDCl<sub>3</sub>)  $\delta$  0.89 (t, 3H,  $J = 6$ Hz, -CH<sub>3</sub>), 1.46 (s, 9H, -C(CH<sub>3</sub>)<sub>3</sub>), 1.31-1.50 (m, 8H, -(CH<sub>2</sub>)<sub>4</sub>), 4.26 (brs, 1H, -CHNH), 4.53 (brs, 1H, -CHNH), 6.09 (dd,  $J = 10$ Hz, 16Hz, -CHCHC<sub>6</sub>H<sub>5</sub>) 6.51 (d, 1H,  $J = 16$  Hz, -CHCHC<sub>6</sub>H<sub>5</sub>), 7.21-7.38 (m, 5H, ArH); <sup>13</sup>C NMR (125 MHz, CDCl<sub>3</sub>)  $\delta$  14.01, 22.61, 24.45, 25.53, 28.44, 31.65, 35.63, 126.37, 127.44, 128.54, 129.81, 136.91, 195.53; HRMS (EI) exact mass calculated for (C<sub>19</sub>H<sub>29</sub>NO<sub>2</sub>) requires  $m/z$  303.21983, found  $m/z$  303.2205 [M+Na]<sup>+</sup>.

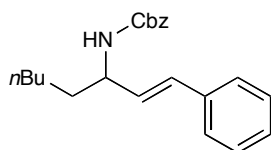

**(E)-benzyl 1-phenyloct-1-en-3-ylcarbamate (Table 3, entry 7):**

Prepared according to the general procedure from potassium *trans*-styryltrifluoroborate (100 mg, 0.476 mmol) and benzyl hex-1-enylcarbamate (mixture of *E* & *Z* isomers) (222.0 mg, 0.952 mmol) at 23 °C for 6 h to provide the title compound as a clear oil (142.4 mg, 89% yield) following silica gel chromatography (5–10% Et<sub>2</sub>O/petroleum ether, R<sub>f</sub> = 0.23 in 5% Et<sub>2</sub>O/petroleum ether). IR (film) 3304, 3032, 2950, 2926, 2856, 1682, 1553, 1495, 1466, 1454, 1300, 1247, 1114, 1044, 1027, 964, 909, 832, 748, 727, 693 cm<sup>-1</sup>; <sup>1</sup>H NMR (400 MHz, CDCl<sub>3</sub>) δ 0.83–0.90 (m, 5H, -CH<sub>2</sub>CH<sub>3</sub>), 1.30–1.38 (m, 6H, -(CH<sub>2</sub>)<sub>3</sub>), 4.34 (brs, 1H, -CHNH), 4.76 (brs, 1H, -CHNH), 5.13 (brs, 2H, -OCH<sub>2</sub>Ph), 6.10 (dd, *J* = 8, 20 Hz, -CHCHC<sub>6</sub>H<sub>5</sub>) 6.55 (d, 1H, *J* = 20 Hz, -CHCHC<sub>6</sub>H<sub>5</sub>), 7.21–7.37 (m, 10H, ArH); <sup>13</sup>C NMR (125 MHz, CDCl<sub>3</sub>) δ 14.09, 22.58, 25.47, 31.61, 35.50, 53.10, 66.77, 126.41, 127.57, 128.56, 130.22, 136.50, 136.70, 195.54; HRMS (EI) exact mass calculated for (C<sub>22</sub>H<sub>27</sub>NO<sub>2</sub>) requires *m/z* 337.20418, found *m/z* 337.20465 [M+Na]<sup>+</sup>.

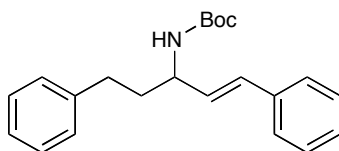

**(E)-tert-butyl 1,5-diphenylpent-1-en-3-ylcarbamate (Table 3, entry 8):**

Prepared according to the general procedure from potassium *trans*-styryltrifluoroborate (100 mg, 0.476 mmol) and *tert*-butyl 3-phenylprop-1-enylcarbamate (mixture of *E* & *Z* isomers) (222.0 mg, 0.952 mmol) at 23 °C for 4 h to provide the title compound as a white solid (149.9 mg, 94% yield) following silica gel chromatography (5% Et<sub>2</sub>O/petroleum ether, R<sub>f</sub> = 0.27 in 5% Et<sub>2</sub>O/petroleum ether). IR (film) 3318, 2980, 2932, 1679, 1524, 1494, 1453, 1433, 1391, 1365, 1246, 1163, 1045, 1026, 969, 866, 742, 693 cm<sup>-1</sup>; <sup>1</sup>H NMR (500 MHz, CDCl<sub>3</sub>) δ 1.47 (s, 9H, -C(CH<sub>3</sub>)<sub>3</sub>), 1.92 (brs, 2H, -CH<sub>2</sub>CH<sub>2</sub>Ph), 2.72 (m, 2H, -CH<sub>2</sub>CH<sub>2</sub>Ph), 4.34 (brs, 1H, -CHNH), 4.59 (brs, 1H, -CHNH), 6.13 (dd, *J* = 10, 15 Hz, -CHCHC<sub>6</sub>H<sub>5</sub>) 6.55 (d, 1H, *J* = 15 Hz, -CHCHC<sub>6</sub>H<sub>5</sub>), 7.20–7.22 (m, 3H, ArH), 7.24–7.32 (m, 5H, ArH), 7.37–7.38 (m, 2H, ArH); <sup>13</sup>C NMR (125 MHz, CDCl<sub>3</sub>) δ 28.33,

28.37, 28.45, 32.29, 37.17, 37.34, 52.35, 125.99, 126.08, 126.42, 127.59, 128.44, 128.51, 128.58, 128.78, 130.36, 136.80, 141.60; HRMS (EI) exact mass calculated for (C<sub>22</sub>H<sub>27</sub>NO<sub>2</sub>) requires  $m/z$  337.20418, found  $m/z$  337.20447 [M+Na]<sup>+</sup>.

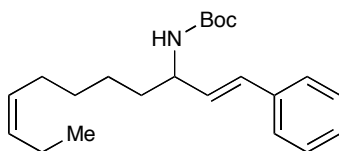

***tert*-butyl (1*E*, 8*Z*)-1-phenylundeca-1,8-dien-3-ylcarbamate (Table 3, entry 9):**

Prepared according to the general procedure from potassium *trans*-styryltrifluoroborate (100 mg, 0.476 mmol) and *tert*-butyl nona-1,8-dienylcarbamate (mixture of *E* & *Z* isomers) (228.0 mg, 0.952 mmol) at 23 °C for 4 h to provide the title compound as a clear oil (161.0 mg, 98% yield) following silica gel chromatography (1–5% Et<sub>2</sub>O/petroleum ether, R<sub>f</sub> = 0.32 in 5% Et<sub>2</sub>O/petroleum ether). IR (film) 3377, 2978, 2965, 2934, 2856, 1687, 1504, 1460, 1447, 1388, 1364, 1304, 1235, 1165, 1053, 1003, 985, 914, 862, 750, 693 cm<sup>-1</sup>; <sup>1</sup>H NMR (500 MHz, CDCl<sub>3</sub>) δ 0.94–0.97 (m, 3H, -CH<sub>3</sub>), 1.39 (m, 4H, -(CH<sub>2</sub>)<sub>2</sub>), 1.45 (s, 9H, -C(CH<sub>3</sub>)<sub>3</sub>), 2.00–2.04 (m, 6H, -(CH<sub>2</sub>)<sub>3</sub>), 4.26 (brs, 1H, -CHNH), 4.54 (brs, 1H, -CHNH), 5.34 (m, 2H, -CH<sub>2</sub>CHCHCH<sub>2</sub>-), 6.09 (dd, *J* = 5Hz, 15Hz, -CHCHC<sub>6</sub>H<sub>5</sub>), 6.51 (d, 1H, *J* = 15 Hz, -CHCHC<sub>6</sub>H<sub>5</sub>), 7.23 (dd, 1H, *J* = 10 Hz, ArH), 7.30 (dd, 2H, *J* = 5, 10 Hz, ArH), 7.37 (d, 2H, *J* = 10 Hz, ArH); <sup>13</sup>C NMR (125 MHz, CDCl<sub>3</sub>) δ 14.39, 20.54, 25.49, 26.99, 28.31, 28.45, 29.55, 35.58, 126.39, 127.46, 128.54, 128.88, 129.91, 130.76, 131.88, 136.93; HRMS (EI) exact mass calculated for (C<sub>22</sub>H<sub>33</sub>NO<sub>2</sub>) requires  $m/z$  343.25113, found  $m/z$  343.25176 [M+Na]<sup>+</sup>.

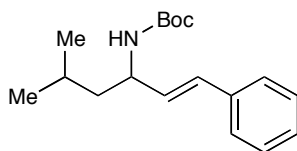

**(*E*)-*tert*-butyl 5-methyl-1-phenylhex-1-en-3-ylcarbamate (Table 3, entry 10):**

Prepared according to the general procedure from potassium *trans*-styryltrifluoroborate (100 mg, 0.476 mmol) and *tert*-butyl 4-methylpent-1-enylcarbamate (mixture of *E* & *Z* isomers) (176.0 mg, 0.952 mmol) at 23 °C for 4 h to provide the title compound as a clear oil (123.8.0 mg, 90% yield) following silica gel chromatography (3% Et<sub>2</sub>O/petroleum

ether,  $R_f = 0.29$  in 5% Et<sub>2</sub>O/petroleum ether). IR (film) 3321, 2976, 2951, 2934, 1685, 1534, 1494, 1389, 1364, 1273, 1249, 1166, 1124, 1049, 1027, 966, 877, 741, 690 cm<sup>-1</sup>; <sup>1</sup>H NMR (500 MHz, CDCl<sub>3</sub>)  $\delta$  0.956 (dd, 6H,  $J = 2, 25$  Hz, -CH(CH<sub>3</sub>)<sub>2</sub>), 1.06 (dd, 2H,  $J = 5, 25$ , Hz, -CH<sub>2</sub>CH(CH<sub>3</sub>)<sub>2</sub>), 1.46 (s, 9H, -C(CH<sub>3</sub>)<sub>3</sub>), 1.71 (m, 1H, -CH<sub>2</sub>CH(CH<sub>3</sub>)<sub>2</sub>), 4.33 (brs, 1H, -CHNH), 4.49 (brs, 1H, -CHNH), 6.07 (dd,  $J = 15$ Hz, 10Hz, -CHCHC<sub>6</sub>H<sub>5</sub>) 6.52 (d, 1H,  $J = 15$  Hz, -CHCHC<sub>6</sub>H<sub>5</sub>), 7.23 (m, 1H, ArH), 7.31 (m, 2H, ArH), 7.37 (d, 2H,  $J = 10$  Hz, ArH); <sup>13</sup>C NMR (125 MHz, CDCl<sub>3</sub>)  $\delta$  22.63, 22.92, 24.78, 24.97, 25.34, 27.19, 28.36, 28.38, 28.44, 44.81, 50.76, 126.37, 127.44, 128.53, 129.71, 130.97; HRMS (EI) exact mass calculated for (C<sub>18</sub>H<sub>27</sub>NO<sub>2</sub>) requires  $m/z$  289.20418, found  $m/z$  289.20432 [M+Na]<sup>+</sup>.

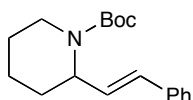

**tert-butyl 2-styrylpiperidine-1-carboxylate:** Prepared according to the general procedure from potassium *trans*-styryltrifluoroborate (15.0 mg, 0.0714 mmol) and *N*-(*tert*-butoxycarbonyl)-1,2,3,4-tetrahydropyridine<sup>6</sup> (26.2 mg, 0.143 mmol) at -20 °C for 19 h. Reaction conversion determined by achiral GLC analysis on a Varian HP-1 column relative to 4,4'-dimethylbiphenyl as internal standard. IR (film) 2940, 2920, 2855, 1681, 1449, 1398, 1364, 1326, 1275, 1252, 1240, 1157, 1117, 1090, 1039, 1012, 969, 961, 929, 870, 769, 757, 748, 708 cm<sup>-1</sup>; <sup>1</sup>H NMR (500 MHz, CDCl<sub>3</sub>)  $\delta$  1.49 (s, 9H, -C(CH<sub>3</sub>)<sub>3</sub>), 1.52-1.63 (m, 4H, -CH(CH<sub>2</sub>)<sub>3</sub>CH<sub>2</sub>NH-), 1.74-1.86 (m, 2H, -CH(CH<sub>2</sub>)<sub>3</sub>CH<sub>2</sub>NH-), 2.92 (t, 1H,  $J = 13$  Hz, -CH(CH<sub>2</sub>)<sub>3</sub>CH<sub>2</sub>NH-), 4.01 (brd, 1H,  $J = 12$  Hz, -CH(CH<sub>2</sub>)<sub>3</sub>CH<sub>2</sub>NH), 4.97 (brs, 1H, -CHNH), 6.19 (dd,  $J = 16$ Hz, 5Hz, -CHCHC<sub>6</sub>H<sub>5</sub>) 6.40 (d, 1H,  $J = 16$  Hz, -CHCHC<sub>6</sub>H<sub>5</sub>), 7.22-7.25 (m, 1H, ArH), 7.31-7.38 (m, 4H, ArH); <sup>13</sup>C NMR (125 MHz, CDCl<sub>3</sub>)  $\delta$  19.71, 25.58, 28.50, 29.54, 79.49, 126.25, 127.39, 128.58, 128.74, 130.70; HRMS (EI) exact mass calculated for (C<sub>18</sub>H<sub>27</sub>NO<sub>2</sub>) requires  $m/z$  287.18853, found  $m/z$  310.17767 [M+Na]<sup>+</sup>.

### Reactions with Potassium Benzyltrifluoroborate

<sup>6</sup> Prepared according to: Dieter, K. R.; Sharma, R. R. *J. Org. Chem.* **1996**, *61*, 4180.

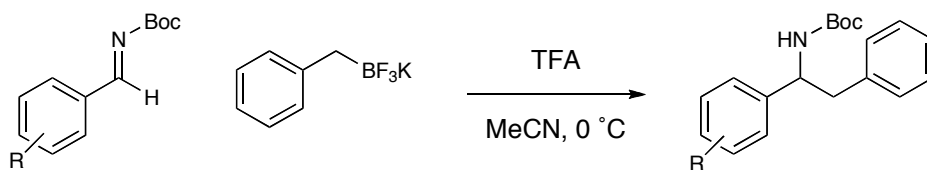

**General Procedure:** To a rigorously degassed solution of potassium benzyltrifluoroborate (50.0 mg, 0.252 mmol) and benzaldehyde *N*-(*tert*-butoxycarbonyl)imine (104 mg, 0.505 mmol) in acetonitrile (2.5 mL, 0.1 M) at 23 °C was added dropwise trifluoroacetic acid (19  $\mu$ L, 0.252 mmol). The reaction was stirred at 23 °C for 4 h, then the crude reaction mixture was poured into a separatory funnel containing  $\text{NaHCO}_3$  (sat. aq.) and extracted with  $\text{CH}_2\text{Cl}_2$  (3  $\times$  25 mL). The combined organic phase was dried ( $\text{Na}_2\text{SO}_4$ ), concentrated *in vacuo* and purified via silica gel chromatography (5%  $\text{Et}_2\text{O}$ /hexanes) to give the desired product as a white solid (39.6 mg, 50% yield).

**Determination of Initial Reaction Rates:** To an oven dried vial was added standardized solutions of benzyl trifluoroborate (0.300 mmol, 0.74 mL), 4,4'-dimethylbiphenyl (0.075 mmol, 0.88 mL) and imine (0.450 mmol, 0.62 mL) in acetonitrile. The reaction was diluted to a total volume of 3.0 mL with acetonitrile, sealed with a septa cap, cooled to 0 °C and purged with argon for 20 minutes. Trifluoroacetic acid (0.300 mmol, 22.3  $\mu$ L) was added dropwise and the reaction was sampled at the indicated time periods. Sampling was accomplished by withdrawing 0.10 mL of crude reaction mixture via syringe and filtering through a plug of silica gel with  $\text{Et}_2\text{O}$ . The amount of product present was determined via GLC analysis relative to the internal standard on a Varian HP-1 column.

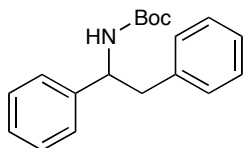

**(*N*)-*tert*-butoxycarbonyl  $\alpha$ -benzyl-benzylamine:**  $^1\text{H}$  NMR and  $^{13}\text{C}$  NMR data in accord

with literature values.<sup>7</sup> Conversion factor for initial rate determination: 0.6182833 mmol product / 4,4'-dimethylbiphenyl.

Run #1:  $k_{\text{initial}} = 1.57 \times 10^{-3} \text{ M/min}^{-1}$

| Time (min) | Area std | Area pdt | % pdt      | mmol pdt   |
|------------|----------|----------|------------|------------|
| 0          | 0        | 0        | 0          | 0          |
| 2          | 989.206  | 95.6969  | 1.49533553 | 0.00448601 |
| 4          | 2830.88  | 492.046  | 2.68665419 | 0.00805996 |
| 6          | 1634.67  | 408.59   | 3.8635378  | 0.01159061 |
| 8          | 1888.07  | 593.887  | 4.86198094 | 0.01458594 |
| 10         | 1858.37  | 672.771  | 5.59580538 | 0.01678742 |
| 12         | 2901.9   | 1189.1   | 6.33378711 | 0.01900136 |
| 14         | 1847.43  | 845.485  | 7.07400627 | 0.02122202 |
| 16         | 2192.12  | 1076.99  | 7.59407481 | 0.02278222 |
| 20         | 1495.66  | 836.098  | 8.64075777 | 0.02592227 |
| 25         | 2666.8   | 869.129  | 5.03757262 | 0.01511272 |
| 30         | 2194.6   | 1403.8   | 9.88729263 | 0.02966188 |

Run #2:  $k_{\text{initial}} = 1.59 \times 10^{-3} \text{ M/min}^{-1}$

| Time (min) | Area std | Area pdt | % pdt      | mmol pdt   |
|------------|----------|----------|------------|------------|
| 0          | 0        | 0        | 0          | 0          |
| 2          | 1431.19  | 155.688  | 1.68145547 | 0.00504437 |
| 4          | 1440.64  | 251.977  | 2.70354098 | 0.00811062 |
| 6          | 1622.65  | 406.255  | 3.86991468 | 0.01160974 |
| 8          | 1831.56  | 550.617  | 4.6468215  | 0.01394046 |
| 10         | 1966.86  | 686.274  | 5.39326329 | 0.01617979 |
| 12         | 2207.34  | 838.733  | 5.8732978  | 0.01761989 |
| 14         | 2132.35  | 882.219  | 6.39507204 | 0.01918522 |
| 16         | 2404.74  | 1034.01  | 6.64636421 | 0.01993909 |
| 20         | 2268.55  | 1053.62  | 7.17898713 | 0.02153696 |
| 25         | 1648.72  | 826.923  | 7.75256989 | 0.02325771 |
| 30         | 1558.63  | 825.312  | 8.18469789 | 0.02455409 |

Run #3:  $k_{\text{initial}} = 1.53 \times 10^{-3} \text{ M/min}^{-1}$

<sup>7</sup> Beak, P.; Park, Y. S.; Boys, M.L. *J. Am. Chem. Soc.* **1996**, *118*, 3757.

| Time (min) | Area std | Area pdt | % pdt      | mmol pdt   |
|------------|----------|----------|------------|------------|
| 0          | 0        | 0        | 0          | 0          |
| 2          | 1325.6   | 138.062  | 1.609864   | 0.00482959 |
| 4          | 1674.45  | 295.69   | 2.72955581 | 0.00818867 |
| 6          | 1185.44  | 286.882  | 3.74068594 | 0.01122206 |
| 8          | 1608.4   | 467.73   | 4.49498955 | 0.01348497 |
| 10         | 1493.23  | 504.836  | 5.22578016 | 0.01567734 |
| 12         | 1800.9   | 668.496  | 5.7376855  | 0.01721306 |
| 14         | 1724.49  | 689.1    | 6.17659456 | 0.01852978 |
| 16         | 1962.18  | 836.461  | 6.5892256  | 0.01976768 |
| 20         | 2573.9   | 1164.89  | 6.9955324  | 0.0209866  |
| 25         | 2383.14  | 1154.78  | 7.48992075 | 0.02246976 |
| 30         | 2024.87  | 1041.908 | 7.95352685 | 0.02386058 |

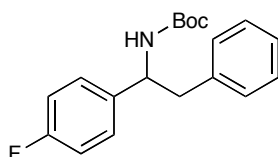

**(N)-tert-butoxycarbonyl  $\alpha$ -benzyl-4-fluorobenzylamine:** IR (film) 3383, 2976, 2908, 1675, 1604, 1506, 1455, 1442, 1391, 1365, 1350, 1296, 1266, 1250, 1223, 1168, 1158, 1097, 1081, 1044, 1014, 876, 837, 819, 730, 699  $\text{cm}^{-1}$ ;  $^1\text{H}$  NMR (500 MHz,  $\text{CDCl}_3$ )  $\delta$  1.38 (s, 9H,  $-\text{C}(\text{CH}_3)_3$ ), 3.00 (brs, 2H,  $-\text{CH}_2\text{Ph}$ ), 4.88 (brs, 2H,  $-\text{CHNH}$ ), 6.96-6.99 (m, 2H, ArH), 7.01-7.03 (m, 2H, ArH), 7.12-7.15 (m, 2H, ArH), 7.18-7.25 (m, 3H, ArH);  $^{13}\text{C}$  NMR (125 MHz,  $\text{CDCl}_3$ )  $\delta$  28.32, 43.35, 115.18, 115.34, 126.62, 127.95, 128.01, 128.38, 129.40, 137.04; HRMS (EI) exact mass calculated for ( $\text{C}_{19}\text{H}_{22}\text{FNO}_2$ ) requires  $m/z$  315.16346, found  $m/z$  338.15347 [ $\text{M}+\text{Na}$ ] $^+$ . Conversion factor for initial rate determination: 0.818235 mmol product / 4,4'-dimethylbiphenyl.

Run #1:  $k_{\text{initial}} = 1.62 \times 10^{-3} \text{ M/min}^{-1}$

| Time (min) | Area std | Area pdt | % pdt      | mmol pdt   |
|------------|----------|----------|------------|------------|
| 0          | 0        | 0        | 0          | 0          |
| 2          | 1472.79  | 106.221  | 1.47532472 | 0.00442597 |
| 4          | 1571.33  | 207.437  | 2.70045461 | 0.00810136 |
| 6          | 1310.42  | 249.41   | 3.89333174 | 0.01168    |
| 8          | 2074.01  | 483.968  | 4.7733564  | 0.01432007 |
| 10         | 1926.55  | 534.701  | 5.67739058 | 0.01703217 |
| 12         | 2016.9   | 631.417  | 6.40397998 | 0.01921194 |
| 14         | 2087.06  | 726.588  | 7.12149785 | 0.02136449 |
| 16         | 2692.8   | 985.214  | 7.4841854  | 0.02245256 |
| 18         | 1342.05  | 554.635  | 8.45389086 | 0.02536167 |
| 20         | 1632.04  | 706.03   | 8.84933055 | 0.02654799 |

Run #2:  $k_{\text{initial}} = 1.59 \times 10^{-3} \text{ M/min}^{-1}$ 

| Time (min) | Area std | Area pdt | % pdt      | mmol pdt   |
|------------|----------|----------|------------|------------|
| 0          | 0        | 0        | 0          | 0          |
| 2          | 1226.71  | 93.9261  | 1.56625491 | 0.00469876 |
| 4          | 2262.88  | 299.328  | 2.70585102 | 0.00811755 |
| 6          | 2446.21  | 451.769  | 3.77781556 | 0.01133345 |
| 8          | 2203.03  | 509.159  | 4.72771268 | 0.01418314 |
| 10         | 1470.71  | 422.736  | 5.8797688  | 0.01763931 |
| 12         | 2299.83  | 731.335  | 6.50487094 | 0.01951461 |
| 14         | 2239.32  | 788.038  | 7.19861691 | 0.02159585 |
| 16         | 2948.97  | 916.794  | 6.35944871 | 0.01907835 |
| 18         | 1448.46  | 587.945  | 8.30325271 | 0.02490976 |
| 20         | 2089.22  | 887.642  | 8.69103962 | 0.02607312 |

Run #3:  $k_{\text{initial}} = 1.63 \times 10^{-3} \text{ M/min}^{-1}$ 

| Time (min) | Area std | Area pdt | % pdt      | mmol pdt   |
|------------|----------|----------|------------|------------|
| 0          | 0        | 0        | 0          | 0          |
| 2          | 1114.47  | 87.5502  | 1.60696649 | 0.0048209  |
| 4          | 2062.88  | 281.093  | 2.78736682 | 0.0083621  |
| 6          | 2128.29  | 405.899  | 3.90126308 | 0.01170379 |
| 8          | 2520.53  | 611.233  | 4.96058601 | 0.01488176 |
| 10         | 2407.91  | 683.659  | 5.80787614 | 0.01742363 |
| 12         | 1951.32  | 633.944  | 6.64569585 | 0.01993709 |
| 14         | 2036.95  | 730.884  | 7.33983247 | 0.0220195  |
| 16         | 2178     | 854.954  | 8.02976683 | 0.0240893  |

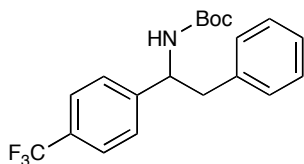

**(N)-tert-butoxycarbonyl  $\alpha$ -benzyl-4-trifluoromethylbenzylamine:** IR (film) 3380, 2979, 1675, 1619, 1519, 1496, 1443, 1367, 1325, 1267, 1251, 1162 1123, 1108, 1067, 1046, 1016, 850, 839, 779, 752, 732, 699  $\text{cm}^{-1}$ ;  $^1\text{H}$  NMR (500 MHz,  $\text{CDCl}_3$ )  $\delta$  1.38 (s, 9H,  $-\text{C}(\text{CH}_3)_3$ ), 3.03 (brs, 2H,  $-\text{CH}_2\text{Ph}$ ), 4.96 (brs, 2H,  $-\text{CHNH}$ ), 7.02-7.04 (m, 2H, ArH), 7.21-7.24 (m, 3H, ArH), 7.29-7.31 (m, 2H, ArH), 7.55-7.56 (m, 2H, ArH);  $^{13}\text{C}$  NMR (125 MHz,  $\text{CDCl}_3$ )  $\delta$  28.04, 28.29, 125.42, 126.68, 126.86, 128.54, 129.33, 155.01; HRMS (EI) exact mass calculated for  $(\text{C}_{20}\text{H}_{22}\text{F}_3\text{NO}_2)$  requires  $m/z$  364.12863, found  $m/z$  365.13562  $[\text{M}+\text{H}]^+$ . Conversion factor for initial rate determination: 0.8526336 mmol product / 4,4'-dimethylbiphenyl.



Run #1:  $k_{\text{initial}} = 2.29 \times 10^{-3} \text{ M/min}^{-1}$ 

| Time (min) | Area std | Area pdt | % pdt      | mmol pdt   |
|------------|----------|----------|------------|------------|
| 0          | 0        | 0        | 0          | 0          |
| 2          | 1615.58  | 174.818  | 2.30653543 | 0.00691961 |
| 4          | 1627.38  | 343.351  | 4.49729933 | 0.0134919  |
| 6          | 1852.71  | 504.142  | 5.80026567 | 0.0174008  |
| 8          | 3474     | 1046.13  | 6.41886577 | 0.0192566  |
| 10         | 2257.12  | 844.279  | 7.97322078 | 0.02391966 |
| 12         | 1790.91  | 758.101  | 9.02309978 | 0.0270693  |
| 14         | 1116.73  | 525.649  | 10.0334458 | 0.03010034 |
| 16         | 2144.88  | 1052.02  | 10.4549858 | 0.03136496 |
| 18         | 2162.61  | 1114.35  | 10.9836292 | 0.03295089 |
| 20         | 2948.02  | 1574.72  | 11.3861099 | 0.03415833 |

Run #2:  $k_{\text{initial}} = 2.40 \times 10^{-3} \text{ M/min}^{-1}$ 

| Time (min) | Area std | Area pdt | % pdt      | mmol pdt   |
|------------|----------|----------|------------|------------|
| 0          | 0        | 0        | 0          | 0          |
| 2          | 1990.79  | 267.38   | 2.8628983  | 0.00858869 |
| 4          | 1927.93  | 426.558  | 4.71616816 | 0.0141485  |
| 6          | 2222.73  | 639.109  | 6.12901485 | 0.01838704 |
| 8          | 2211.4   | 755.08   | 7.27826918 | 0.02183481 |
| 10         | 2444.55  | 950.011  | 8.28384876 | 0.02485155 |
| 12         | 1819.7   | 790.147  | 9.25572733 | 0.02776718 |
| 14         | 1385.19  | 660.172  | 10.1589823 | 0.03047695 |
| 16         | 1369.3   | 699.906  | 10.8954096 | 0.03268623 |
| 18         | 1562.3   | 842.2    | 11.4908791 | 0.03447264 |
| 20         | 1923.3   | 1080.86  | 11.9791186 | 0.03593736 |

Run #3:  $k_{\text{initial}} = 2.26 \times 10^{-3} \text{ M/min}^{-1}$ 

| Time (min) | Area std | Area pdt | % pdt      | mmol pdt   |
|------------|----------|----------|------------|------------|
| 0          | 0        | 0        | 0          | 0          |
| 2          | 2086.27  | 297.532  | 3.03994426 | 0.00911983 |
| 4          | 1613.24  | 363.3    | 4.80030539 | 0.01440092 |
| 6          | 2410.13  | 666.702  | 5.89649237 | 0.01768948 |
| 8          | 2343.86  | 775.736  | 7.0548004  | 0.0211644  |
| 10         | 2023.92  | 751.613  | 7.91595639 | 0.02374787 |
| 12         | 738.867  | 308.725  | 8.90651863 | 0.02671956 |
| 14         | 1864.3   | 824.316  | 9.42497879 | 0.02827494 |
| 16         | 1648.38  | 776.833  | 10.0455283 | 0.03013658 |
| 18         | 1313.37  | 650.461  | 10.5569052 | 0.03167072 |
| 20         | 2304.33  | 1161.54  | 10.744642  | 0.03223393 |

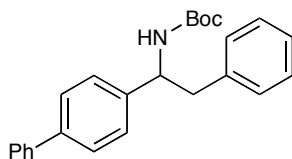

**(N)-tert-butoxycarbonyl  $\alpha$ -benzyl-4-phenylbenzylamine:** IR (film) 3382, 2874, 2923, 1679, 1602, 1514, 1488, 1453, 1442, 1390, 1364, 1290, 1265, 1247, 1167, 1081, 1043, 1021, 1007, 851, 838, 760, 728, 719, 692  $\text{cm}^{-1}$ ;  $^1\text{H}$  NMR (500 MHz,  $\text{CDCl}_3$ )  $\delta$  1.39 (s, 9H,  $-\text{C}(\text{CH}_3)_3$ ), 3.10 (brs, 2H,  $-\text{CH}_2\text{Ph}$ ), 4.94 (brs, 2H,  $-\text{CHNH}$ ), 7.08-7.09 (m, 2H, ArH), 7.20-7.28 (m, 5H, ArH), 7.33-7.36 (m, 1H, ArH), 7.44-7.47 (m, 2H, ArH), 7.53-7.54 (m, 2H, ArH), 7.58-7.59 (m, 2H, ArH);  $^{13}\text{C}$  NMR (125 MHz,  $\text{CDCl}_3$ )  $\delta$  28.35, 43.31, 126.55, 126.84, 127.06, 127.20, 127.26, 127.37, 128.36, 128.78, 129.45, 137.33, 140.04; HRMS (EI) exact mass calculated for ( $\text{C}_{25}\text{H}_{27}\text{NO}_2$ ) requires  $m/z$  373.20418, found  $m/z$  396.19325  $[\text{M}+\text{Na}]^+$ . Conversion factor for initial rate determination: 1.0763331 mmol product / 4,4'-dimethylbiphenyl.

Run #1:  $k_{\text{initial}} = 1.50 \times 10^{-3} \text{ M/min}^{-1}$

| Time (min) | Area std | Area pdt | % pdt      | mmol pdt   |
|------------|----------|----------|------------|------------|
| 0          | 0        | 0        | 0          | 0          |
| 2          | 1648.68  | 74.3869  | 1.21407858 | 0.00364224 |
| 4          | 2736.1   | 206.199  | 2.02787552 | 0.00608363 |
| 6          | 2791.96  | 314.332  | 3.02946618 | 0.0090884  |
| 8          | 2328.09  | 341.801  | 3.95057461 | 0.01185172 |
| 10         | 1777.07  | 341.015  | 5.16363638 | 0.01549091 |
| 12         | 2310.38  | 468.956  | 5.46179487 | 0.01638538 |
| 14         | 2292.65  | 529.962  | 6.22004713 | 0.01866014 |
| 16         | 2659.42  | 855.03   | 8.65129512 | 0.02595389 |
| 18         | 2952.53  | 758.271  | 6.91061713 | 0.02073185 |
| 20         | 3090.43  | 891.881  | 7.76559444 | 0.02329678 |

Run #2:  $k_{\text{initial}} = 1.46 \times 10^{-3} \text{ M/min}^{-1}$

| Time (min) | Area std | Area pdt | % pdt      | mmol pdt   |
|------------|----------|----------|------------|------------|
| 0          | 0        | 0        | 0          | 0          |
| 2          | 2447.28  | 101.731  | 1.11855246 | 0.00335566 |
| 4          | 2719.02  | 209.548  | 2.0737568  | 0.00622127 |
| 6          | 2679.84  | 311.412  | 3.12689417 | 0.00938068 |
| 8          | 2145.71  | 332.021  | 4.16371728 | 0.01249115 |
| 10         | 2859.69  | 506.79   | 4.7686537  | 0.01430596 |
| 12         | 2780.41  | 567.492  | 5.49208951 | 0.01647627 |
| 14         | 3030.12  | 677.673  | 6.017929   | 0.01805379 |
| 16         | 3345.04  | 819.382  | 6.59131108 | 0.01977393 |
| 18         | 3117.09  | 808.698  | 6.98109796 | 0.02094329 |
| 20         | 2883.57  | 789.472  | 7.36703847 | 0.02210112 |

Run #3:  $k_{\text{initial}} = 1.47 \times 10^{-3} \text{ M/min}^{-1}$

| Time (min) | Area std | Area pdt | % pdt      | mmol pdt   |
|------------|----------|----------|------------|------------|
| 0          | 0        | 0        | 0          | 0          |
| 2          | 2163.21  | 94.0562  | 1.16997196 | 0.00350992 |
| 4          | 2203.65  | 180.588  | 2.20512379 | 0.00661537 |
| 6          | 1735.09  | 218.012  | 3.38099943 | 0.010143   |
| 8          | 2735.37  | 412.761  | 4.06040432 | 0.01218121 |
| 10         | 2560.26  | 465.694  | 4.89444301 | 0.01468333 |
| 12         | 3047.31  | 801.505  | 7.07744175 | 0.02123233 |
| 14         | 3052.27  | 670.319  | 5.90942583 | 0.01772828 |
| 16         | 2059.69  | 556.528  | 7.27062698 | 0.02181188 |
| 18         | 2171.77  | 626.935  | 7.76775271 | 0.02330326 |
| 20         | 3060.91  | 856.993  | 7.53378842 | 0.02260137 |

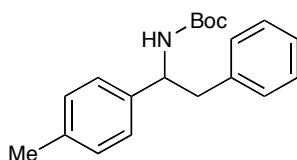

**(N)-tert-butoxycarbonyl  $\alpha$ -benzyl-4-methylbenzylamine:** IR (film) 3384, 2979, 2911, 1681, 1512, 1455, 1440, 1389, 1362, 1314, 1293, 1265, 1248, 1167, 1043, 1020, 850, 804, 778, 730, 719, 697  $\text{cm}^{-1}$ ;  $^1\text{H}$  NMR (500 MHz,  $\text{CDCl}_3$ )  $\delta$  1.37 (s, 9H,  $-\text{C}(\text{CH}_3)_3$ ), 2.32 (s, 3H,  $-\text{CH}_3$ ), 3.04 (brs, 2H,  $-\text{CH}_2\text{Ph}$ ), 4.89 (brs, 2H,  $-\text{CHNH}$ ), 7.05-7.11 (m, 6H, ArH), 7.18-7.24 (m, 3H, ArH);  $^{13}\text{C}$  NMR (125 MHz,  $\text{CDCl}_3$ )  $\delta$  21.12, 28.33, 126.33, 126.42, 128.27, 129.15, 129.44, 136.81, 137.57; HRMS (EI) exact mass calculated for ( $\text{C}_{20}\text{H}_{25}\text{NO}_2$ ) requires  $m/z$  311.18853, found  $m/z$  334.17781  $[\text{M}+\text{Na}]^+$ . Conversion factor for initial rate determination: 0.8700065 mmol product / 4,4'-dimethylbiphenyl.

Run #1:  $k_{\text{initial}} = 1.17 \times 10^{-3} \text{ M}/\text{min}^{-1}$

| Time (min) | Area std | Area pdt | % pdt      | mmol pdt   |
|------------|----------|----------|------------|------------|
| 0          | 0        | 0        | 0          | 0          |
| 5          | 2492.3   | 284.427  | 2.4821785  | 0.00744654 |
| 10         | 1876.84  | 395.861  | 4.58752002 | 0.01376256 |
| 20         | 1626.6   | 628.623  | 8.40566359 | 0.02521699 |
| 25         | 1587.23  | 712.389  | 9.76202347 | 0.02928607 |
| 30         | 2614.38  | 1302.04  | 10.8322362 | 0.03249671 |
| 35         | 2209.4   | 1246.58  | 12.2718012 | 0.0368154  |
| 40         | 1815.63  | 1120.13  | 13.4184881 | 0.04025546 |
| 45         | 2280.5   | 1472.3   | 14.0419927 | 0.04212598 |
| 50         | 2910.38  | 1922.13  | 14.3646671 | 0.043094   |
| 55         | 1700.85  | 1225.64  | 15.6732629 | 0.04701979 |
| 60         | 2925.5   | 2127.56  | 15.8177323 | 0.0474532  |

Run #2:  $k_{\text{initial}} = 1.19 \times 10^{-3} \text{ M/min}^{-1}$ 

| Time (min) | Area std | Area pdt | % pdt      | mmol pdt   |
|------------|----------|----------|------------|------------|
| 0          | 0        | 0        | 0          | 0          |
| 5          | 2159.92  | 236.97   | 2.38626246 | 0.00715879 |
| 10         | 2633.02  | 559.128  | 4.61869825 | 0.01385609 |
| 15         | 1622.31  | 502.634  | 6.73876829 | 0.0202163  |
| 20         | 1476.88  | 577.566  | 8.50587343 | 0.02551762 |
| 25         | 2497.3   | 1126.83  | 9.81409346 | 0.02944228 |
| 30         | 2375.97  | 1222.73  | 11.1931448 | 0.03357943 |
| 35         | 2964.36  | 1696.67  | 12.4488416 | 0.03734652 |
| 40         | 2159.99  | 1327.7   | 13.3693632 | 0.04010809 |
| 45         | 1770.4   | 1183.81  | 14.5436398 | 0.04363092 |
| 50         | 3434.54  | 2357.2   | 14.9276127 | 0.04478284 |
| 55         | 2539.18  | 1828.07  | 15.6589212 | 0.04697676 |
| 60         | 1692.6   | 1287.29  | 16.5418685 | 0.04962561 |

Run #3:  $k_{\text{initial}} = 1.18 \times 10^{-3} \text{ M/min}^{-1}$ 

| Time (min) | Area std | Area pdt | % pdt      | mmol pdt   |
|------------|----------|----------|------------|------------|
| 0          | 0        | 0        | 0          | 0          |
| 5          | 2174.41  | 268.353  | 2.6842782  | 0.00805283 |
| 10         | 1264.53  | 294.549  | 5.06630022 | 0.0151989  |
| 15         | 1469.87  | 467.972  | 6.92473963 | 0.02077422 |
| 20         | 2596     | 996.933  | 8.35264051 | 0.02505792 |
| 25         | 2400     | 1096.9   | 9.94073052 | 0.02982219 |
| 30         | 2406.15  | 1263.35  | 11.4199313 | 0.03425979 |
| 35         | 1780.08  | 1050.47  | 12.8353182 | 0.03850595 |
| 40         | 1722.7   | 1129.62  | 14.2621574 | 0.04278647 |
| 45         | 1982.96  | 1355.61  | 14.8690532 | 0.04460716 |
| 50         | 1099.23  | 812.575  | 16.0781986 | 0.0482346  |
| 55         | 2206.14  | 1686.1   | 16.6231286 | 0.04986939 |
| 60         | 1982.11  | 1577.81  | 17.3136828 | 0.05194105 |

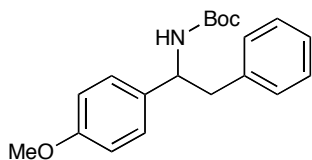

**(N)-tert-butoxycarbonyl  $\alpha$ -benzyl-4-methoxybenzylamine:** IR (film) 3383, 2975, 2910, 2838, 1679, 1613, 1508, 1455, 1441, 1390, 1364, 1303, 1242, 1166, 1109, 1082, 1023, 971, 879, 849, 834, 808, 778, 750, 729, 698  $\text{cm}^{-1}$ ;  $^1\text{H}$  NMR (500 MHz,  $\text{CDCl}_3$ )  $\delta$  1.38 (s, 9H,  $-\text{C}(\text{CH}_3)_3$ ), 3.02 (brs, 2H,  $-\text{CH}_2\text{Ph}$ ), 3.79 (s, 3H,  $-\text{OCH}_3$ ), 4.84 (brs, 2H,  $-\text{CHNH}$ ), 6.83-6.82 (m, 2H, ArH), 7.03-7.05 (m, 2H, ArH), 7.09-7.11 (m, 2H, ArH), 7.18-7.24 (m, 3H, ArH);  $^{13}\text{C}$  NMR (125 MHz,  $\text{CDCl}_3$ )  $\delta$  28.32, 55.27, 113.77, 113.92,

126.41, 127.58, 127.85, 128.26, 128.39, 129.46, 137.54; HRMS (EI) exact mass calculated for (C<sub>20</sub>H<sub>25</sub>NO<sub>3</sub>) requires *m/z* 327.18344, found *m/z* 350.1726 [M+Na]<sup>+</sup>. Conversion factor for initial rate determination: 0.930085 mmol product / 4,4'-dimethylbiphenyl.

Run #1:  $k_{\text{initial}} = 6.89 \times 10^{-5} \text{ M/min}^{-1}$

| Time (min) | Area std | Area pdt | % pdt      | mmol pdt   |
|------------|----------|----------|------------|------------|
| 0          | 0        | 0        | 0          | 0          |
| 10         | 2614.04  | 27.3369  | 0.24316423 | 0.00072949 |
| 15         | 2268.21  | 34.1327  | 0.34990491 | 0.00104971 |
| 20         | 2577.82  | 52.4179  | 0.47281329 | 0.00141844 |
| 25         | 1733.99  | 46.4324  | 0.62264025 | 0.00186792 |
| 30         | 2480.12  | 73.5296  | 0.68936965 | 0.00206811 |
| 35         | 2727.74  | 98.8583  | 0.84269965 | 0.0025281  |
| 40         | 1061.26  | 49.9256  | 1.09386606 | 0.0032816  |
| 45         | 2101.74  | 97.8424  | 1.08245726 | 0.00324737 |
| 50         | 2591.82  | 122.639  | 1.10023742 | 0.00330071 |
| 55         | 2773.27  | 150.958  | 1.2656879  | 0.00379706 |
| 60         | 2960.67  | 173.504  | 1.36264315 | 0.00408793 |

Run #2:  $k_{\text{initial}} = 6.86 \times 10^{-5} \text{ M/min}^{-1}$

| Time (min) | Area std | Area pdt | % pdt      | mmol pdt   |
|------------|----------|----------|------------|------------|
| 0          | 0        | 0        | 0          | 0          |
| 5          | 2711.22  | 17.7384  | 0.15212911 | 0.00045639 |
| 10         | 2170.09  | 21.7364  | 0.23290163 | 0.0006987  |
| 15         | 1503.12  | 24.6404  | 0.38116828 | 0.0011435  |
| 20         | 2536.31  | 49.1952  | 0.45100675 | 0.00135302 |
| 25         | 2638.28  | 63.5088  | 0.55972624 | 0.00167918 |
| 30         | 1497.03  | 46.8724  | 0.7280301  | 0.00218409 |
| 35         | 2241.67  | 75.0817  | 0.77879843 | 0.0023364  |
| 40         | 1194.23  | 50.0488  | 0.9744697  | 0.00292341 |
| 45         | 2486.65  | 107.969  | 1.00959471 | 0.00302878 |
| 50         | 2530.91  | 123.648  | 1.13598617 | 0.00340796 |
| 55         | 1164.16  | 67.946   | 1.35710631 | 0.00407132 |
| 60         | 2897.52  | 166.27   | 1.33428961 | 0.00400287 |

Run #3:  $k_{\text{initial}} = 7.50 \times 10^{-5} \text{ M/min}^{-1}$

| Time (min) | Area std | Area pdt | % pdt      | mmol pdt   |
|------------|----------|----------|------------|------------|
| 0          | 0        | 0        | 0          | 0          |
| 5          | 1675.5   | 9.45473  | 0.13121012 | 0.00039363 |
| 10         | 2230.82  | 21.438   | 0.22345104 | 0.00067035 |
| 15         | 2120.44  | 33.2527  | 0.36463938 | 0.00109392 |
| 20         | 2842.6   | 55.4533  | 0.4536013  | 0.0013608  |
| 25         | 2791.64  | 69.4631  | 0.57857198 | 0.00173572 |
| 30         | 1757.26  | 58.9961  | 0.78063843 | 0.00234192 |
| 35         | 2993.95  | 104.693  | 0.81308463 | 0.00243925 |
| 40         | 3227.72  | 128.679  | 0.92698877 | 0.00278097 |
| 45         | 3125.1   | 145      | 1.07851438 | 0.00323554 |
| 50         | 2679.38  | 141.206  | 1.22541019 | 0.00367623 |
| 55         | 2217.13  | 137.066  | 1.43747808 | 0.00431243 |
| 60         | 1683.32  | 125.807  | 1.73780392 | 0.00521341 |

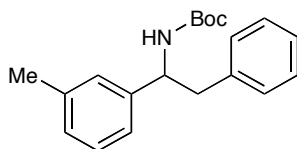

**(N)-tert-butoxycarbonyl  $\alpha$ -benzyl-3-methylbenzylamine:** IR (film) 3383, 2980, 2920, 1682, 1606, 1517, 1495, 1443, 1389, 1363, 1349, 1264, 1244, 1159, 1083, 1044, 1027, 1012, 886, 853, 786, 776, 752, 730, 699  $\text{cm}^{-1}$ ;  $^1\text{H}$  NMR (500 MHz,  $\text{CDCl}_3$ )  $\delta$  1.37 (s, 9H,  $-\text{C}(\text{CH}_3)_3$ ), 2.32 (s, 3H,  $-\text{CH}_3$ ), 3.04 (brs, 2H,  $-\text{CH}_2\text{Ph}$ ), 4.86 (brs, 2H,  $-\text{CHNH}$ ), 6.98-7.00 (m, 2H, ArH), 7.04-7.07 (m, 3H, ArH), 7.17-7.20 (m, 2H, ArH), 7.22-7.24 (m, 2H, ArH);  $^{13}\text{C}$  NMR (125 MHz,  $\text{CDCl}_3$ )  $\delta$  21.50, 28.33, 123.40, 126.45, 127.22, 127.98, 128.27, 128.35, 129.43, 137.54, 138.07; HRMS (EI) exact mass calculated for ( $\text{C}_{20}\text{H}_{25}\text{NO}_3$ ) requires  $m/z$  311.18853, found  $m/z$  334.17782  $[\text{M}+\text{Na}]^+$ . Conversion factor for initial rate determination: 0.8563388 mmol product / 4,4'-dimethylbiphenyl.

Run #1:  $k_{\text{initial}} = 1.50 \times 10^{-3} \text{ M}/\text{min}^{-1}$

| Time (min) | Area std | Area pdt | % pdt      | mmol pdt   |
|------------|----------|----------|------------|------------|
| 0          | 0        | 0        | 0          | 0          |
| 2          | 1157.99  | 94.9457  | 1.75531928 | 0.00526596 |
| 4          | 2554.1   | 361.433  | 3.02953194 | 0.0090886  |
| 6          | 1796.97  | 341.093  | 4.06366231 | 0.01219099 |
| 8          | 3099.82  | 763.281  | 5.27149266 | 0.01581448 |
| 10         | 1929.3   | 584.892  | 6.49025182 | 0.01947076 |
| 12         | 1863.59  | 638.089  | 7.3302117  | 0.02199064 |
| 14         | 2883.28  | 1086.83  | 8.06975648 | 0.02420927 |
| 16         | 2592.99  | 1070.42  | 8.83769488 | 0.02651308 |
| 18         | 1930.5   | 865.177  | 9.5944656  | 0.0287834  |
| 20         | 2113.16  | 1010.31  | 10.2354726 | 0.03070642 |

Run #2:  $k_{\text{initial}} = 1.15 \times 10^{-3} \text{ M/min}^{-1}$

| Time (min) | Area std | Area pdt | % pdt      | mmol pdt   |
|------------|----------|----------|------------|------------|
| 0          | 0        | 0        | 0          | 0          |
| 2          | 2691.31  | 207.22   | 1.64836572 | 0.0049451  |
| 4          | 1805.57  | 259.94   | 3.0820836  | 0.00924625 |
| 6          | 2823.89  | 533.886  | 4.04749562 | 0.01214249 |
| 8          | 1837.17  | 464.138  | 5.40858192 | 0.01622575 |
| 10         | 1951.35  | 569.904  | 6.25247787 | 0.01875743 |
| 12         | 1780.19  | 603.841  | 7.26175966 | 0.02178528 |
| 14         | 2466.7   | 894.27   | 7.76136233 | 0.02328409 |
| 16         | 3105.7   | 1202.7   | 8.29055185 | 0.02487166 |
| 18         | 3172.01  | 1336.41  | 9.01967314 | 0.02705902 |
| 20         | 2075.12  | 911.109  | 9.39967312 | 0.02819902 |

Run #3:  $k_{\text{initial}} = 1.38 \times 10^{-3} \text{ M/min}^{-1}$

| Time (min) | Area std | Area pdt | % pdt      | mmol pdt   |
|------------|----------|----------|------------|------------|
| 0          | 0        | 0        | 0          | 0          |
| 2          | 1907.59  | 139.714  | 1.56798    | 0.00470394 |
| 4          | 2632.65  | 315.678  | 2.56706474 | 0.00770119 |
| 6          | 1689.91  | 285.036  | 3.61095245 | 0.01083286 |
| 8          | 2951.1   | 602.181  | 4.36846392 | 0.01310539 |
| 10         | 2666.82  | 640.402  | 5.14096452 | 0.01542289 |
| 12         | 2170.8   | 588.227  | 5.80110562 | 0.01740332 |
| 14         | 1259.91  | 397.512  | 6.75454892 | 0.02026365 |
| 16         | 1721.94  | 564.335  | 7.01624268 | 0.02104873 |
| 18         | 911.633  | 329.203  | 7.73088792 | 0.02319266 |
| 20         | 2045.28  | 741.064  | 7.75690684 | 0.02327072 |

**Hammett Plots:** Values for the initial rate were averaged over the three runs and plotted versus  $\sigma^{\delta}$  and  $\sigma_{\alpha}^{\bullet 9}$ .

<sup>8</sup> Values for  $\sigma$  taken from: *Modern Physical Organic Chemistry*; Anslyn, R. A.; Dougherty, D. A.; Publisher: City, Year.

<sup>9</sup> Value for  $\sigma_{\alpha}^{\bullet}$  taken from: Arnold, D. R.; Dust, J. M. *J. Am. Chem. Soc.* **1983**, *105*, 1221.

| R     | Initial Rate | log (Initial Rate) | $\sigma$ | $\sigma_{\alpha^{\bullet}}$ |
|-------|--------------|--------------------|----------|-----------------------------|
| 4-OMe | 7.08333E-05  | -4.14976232        | -0.12    | 0.034                       |
| 4-Me  | 0.00118      | -2.928117993       | -0.14    | 0.015                       |
| 3-Me  | 0.001343333  | -2.871816209       | -0.06    | -0.001                      |
| H     | 0.001563333  | -2.805948412       | 0        | 0                           |
| 4-Ph  | 0.001476667  | -2.830717528       | 0.01     |                             |
| 4-F   | 0.001613333  | -2.792275893       | 0.15     | -0.011                      |
| 4-CF3 | 0.002316667  | -2.63513645        | 0.53     | 0.001                       |

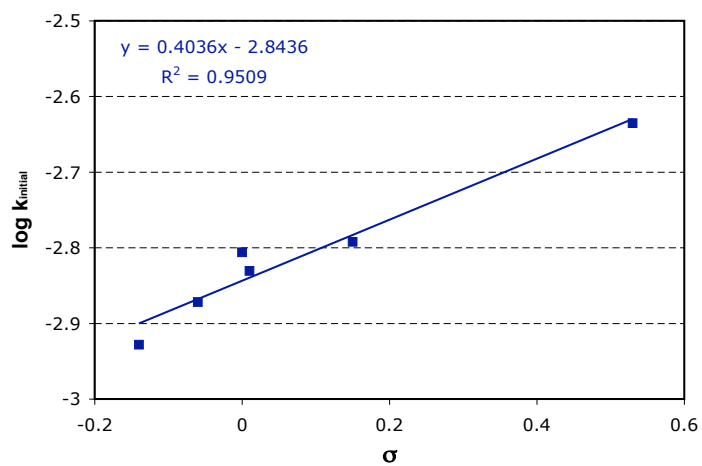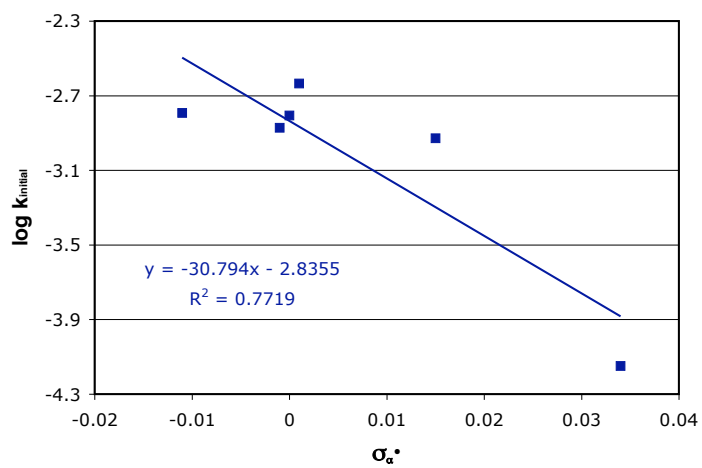



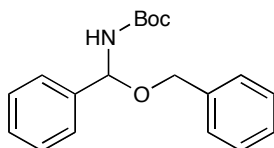

**(N)-tert-butoxycarbonyl  $\alpha$ -benzyl-benzylamine:** To a solution of potassium benzyltrifluoroborate (50.0 mg, 0.252 mmol) and benzaldehyde *N*-(*tert*-butoxycarbonyl)imine (104 mg, 0.505 mmol) in acetonitrile (2.5 mL, 0.1M) at 23 °C was added an O containing balloon and oxygen was bubbled through the solution for 20 minutes. The balloon was removed and 19  $\mu$ L (0.252 mmol) of trifluoroacetic acid was added in a dropwise fashion. The reaction was stirred at 23 °C for 4 h to provide the title compound as a white solid (54.6 mg, 69% yield) following standard workup procedure and silica gel chromatography (5% Et<sub>2</sub>O/hexanes, R<sub>f</sub> = 0.20 in 5% Et<sub>2</sub>O/hexanes). IR (film) 3387, 3270, 3064, 2973, 1720, 1689, 1541, 1518, 1497, 1454, 1362, 1266, 1248, 1170, 1053, 1026, 963, 914, 888, 856, 845, 750, 696 cm<sup>-1</sup>; <sup>1</sup>H NMR (300 MHz, CDCl<sub>3</sub>)  $\delta$  1.48 (s, 9H, -C(CH<sub>3</sub>)<sub>3</sub>), 5.07 (AB, 2H, *J* = 5, 11 Hz, -OCH<sub>2</sub>Ph), 5.31 (brs, 1H, -CHNH), 6.52 (brs, 1H, -CHNH), 7.33-7.36 (m, 10H, ArH); <sup>13</sup>C NMR (125 MHz, CDCl<sub>3</sub>)  $\delta$  28.31, 85.13, 126.51, 128.41, 128.61, 128.99, 129.24, 135.66, 136.32; HRMS (EI) exact mass calculated for (C<sub>19</sub>H<sub>23</sub>NO<sub>3</sub>) requires *m/z* 352.13150 found *m/z* 352.15219 [M+K]<sup>+</sup>.

**<sup>1</sup>HNMR and <sup>13</sup>CNMR Spectra**

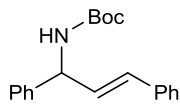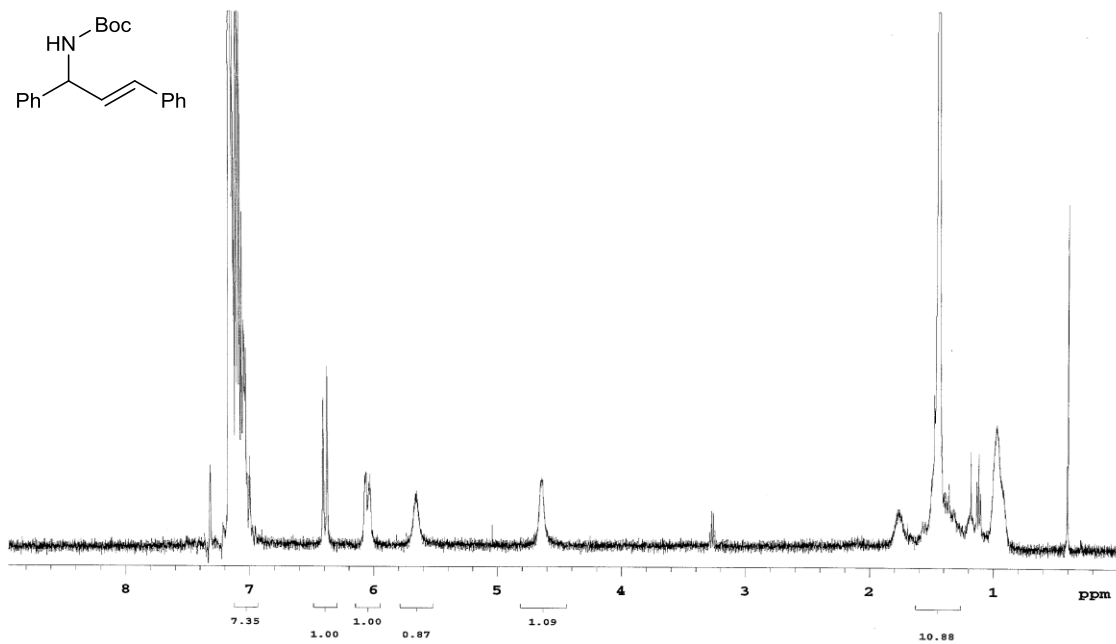

decIV-89-1

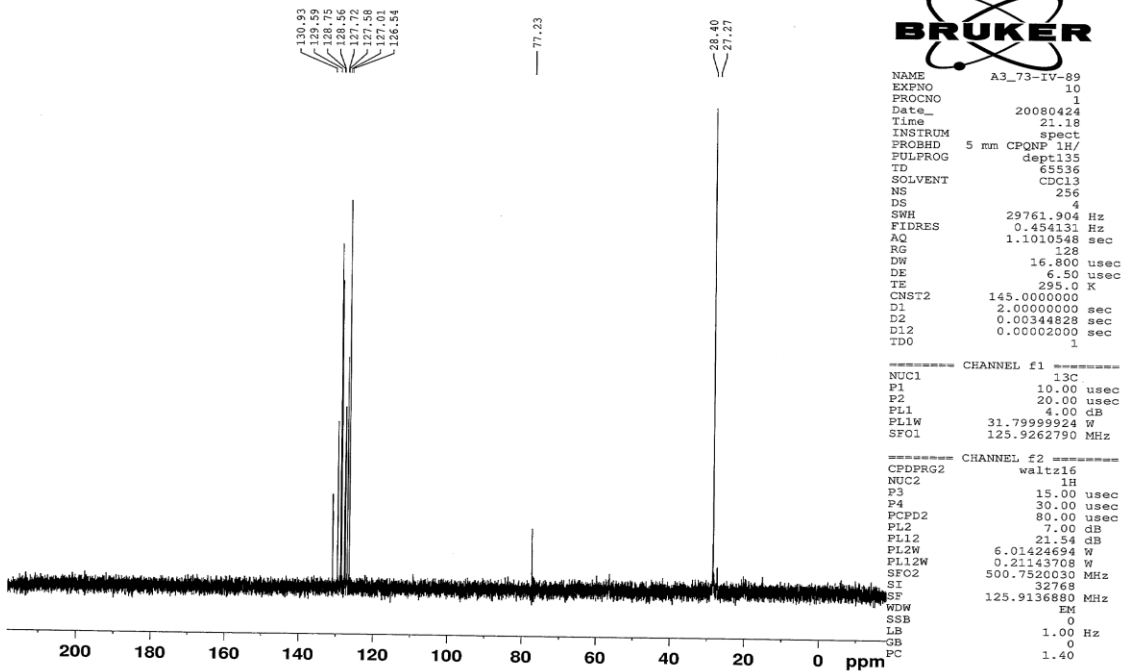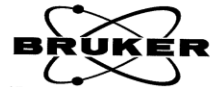

```

NAME      A3_73-IV-89
EXPNO     1
PROCNO    1
Date_     20080424
Time      21.18
INSTRUM   spect
PROBHD    5 mm CPQNP 1H/
FULPROG   dept135
TD         65536
SOLVENT   CDCl3
NS         256
DS         4
SWH        29761.904 Hz
FIDRES     0.454131 Hz
AQ         1.1010548 sec
RG         128
DW         16.800 usec
DE         6.50 usec
TE         295.0 K
CNST2     145.000000
D1         2.00000000 sec
D2         0.00344828 sec
D12        0.00002000 sec
TD0        1
----- CHANNEL f1 -----
NUC1       13C
P1         10.00 usec
P2         20.00 usec
PL1        4.00 dB
PL1W       31.79999924 W
SFO1       125.9262790 MHz
----- CHANNEL f2 -----
CPDPRG2    waltz16
NUC2       1H
P3         15.00 usec
P4         30.00 usec
PCPD2      80.00 usec
PL2        7.00 dB
PL12       21.54 dB
PL2W       6.01424694 W
PL12W      0.21143708 W
SFO2       500.7520030 MHz
SI         32768
SF         125.9136880 MHz
WDW        EM
SSB        0
LB         1.00 Hz
GB         0
PC         1.40
  
```

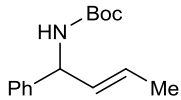

Relax. delay 3.800 sec  
 Pulse 42.4 degrees  
 Acq. time 2.504 sec  
 Width 6524.8 Hz  
 16 repetitions  
 OBSERVE E1, 399.7714698 MHz  
 DATA PROCESSING  
 FT size 32768  
 Total time 1 min, 53 sec

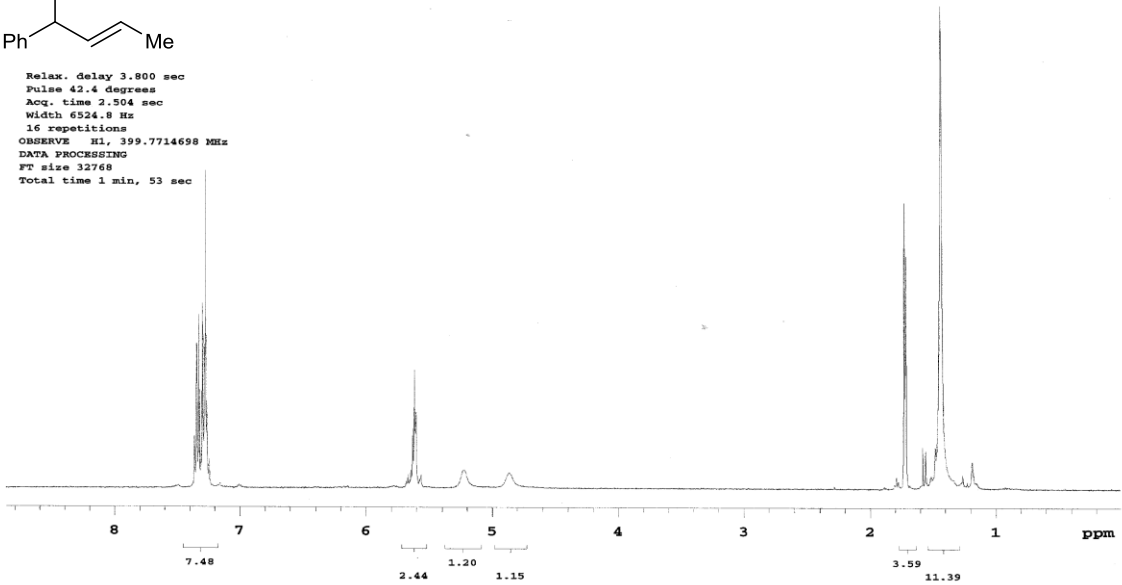

deciv-85-1

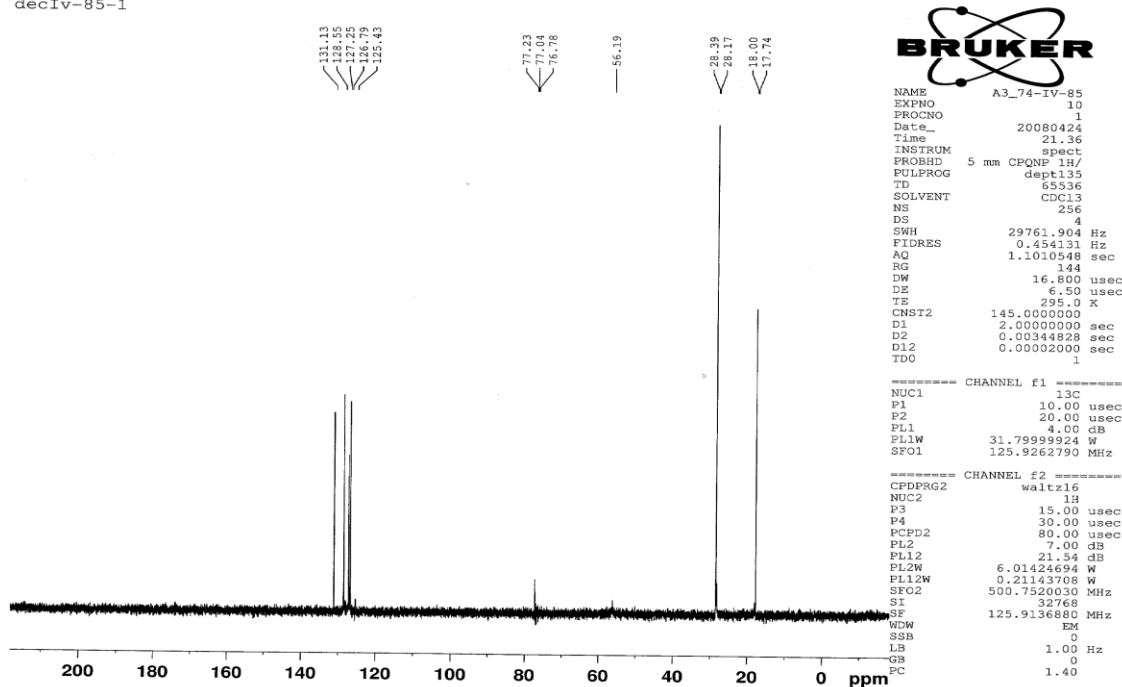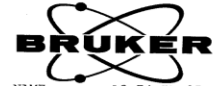

NAME A3\_74-IV-85  
 EXPNO 10  
 PROCNO 1  
 Date\_ 20080424  
 Time 21.36  
 INSTRUM spect  
 PROBHD 5 mm CPQNP 1H/  
 PULPROG dept135  
 TD 65536  
 SOLVENT CDCl3  
 NS 256  
 DS 4  
 SWH 29761.904 Hz  
 FIDRES 0.454131 Hz  
 AQ 1.1010548 sec  
 RG 144  
 DW 16.800 usec  
 DE 6.50 usec  
 TE 295.0 K  
 CNST2 145.0000000  
 D1 2.0000000 sec  
 D2 0.00344828 sec  
 D12 0.00002000 sec  
 TDO 1

----- CHANNEL f1 -----  
 NUC1 13C  
 P1 10.00 usec  
 P2 20.00 usec  
 PL1 4.00 dB  
 FL1W 31.79999924 W  
 SFO1 125.9262790 MHz

----- CHANNEL f2 -----  
 CPDPRG2 waltz16  
 NUC2 1H  
 P3 15.00 usec  
 P4 30.00 usec  
 PCPD2 80.00 usec  
 PL2 7.00 dB  
 PL12 21.54 dB  
 PL2W 6.01424694 W  
 FL12W 0.21143708 W  
 SFO2 500.7520030 MHz  
 SI 32768  
 SF 125.9136680 MHz  
 WDW EM  
 SSB 0  
 LB 1.00 Hz  
 GB 0  
 PC 1.40

decIV-271-1  
 Pulse Sequence: s2pul  
 Solvent: CDCl3  
 Ambient temperature  
 Mercury-300BB "mrsun-3"  
 Relax. delay 3.800 sec  
 Pulse 16.5 degrees  
 Acq. time 2.500 sec  
 Width 6600.7 Hz  
 16 repetitions  
 OBSERVE M1, 300.0560323 MHz  
 DATA PROCESSING  
 FT size 65536  
 Total time 2 min, 7 sec

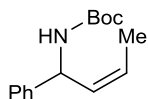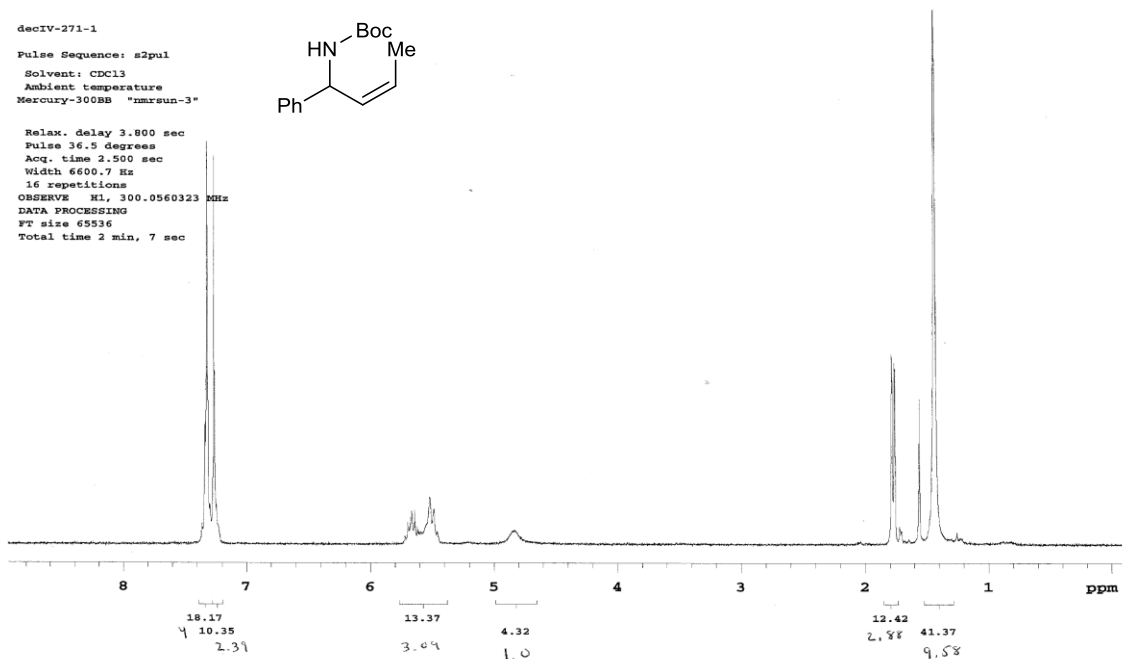

decIV-271-1

130.74  
 128.62  
 126.80  
 126.34

77.23

28.41

17.74

13.40

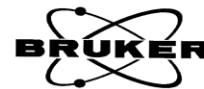

NAME A3\_66-IV-271  
 EXPNO 10  
 PROCNO 1  
 Date\_ 20080424  
 Time 18.10  
 INSTRUM spect  
 PROBHD 5 mm CPQNP 1H/  
 FULPROG dept135  
 TD 65536  
 SOLVENT CDCl3  
 NS 256  
 DS 4  
 SWH 29761.904 Hz  
 FIDRES 0.454131 Hz  
 AQ 1.1010548 sec  
 RG 101  
 DW 16.800 usec  
 DE 6.50 usec  
 TE 295.0 K  
 CNST2 145.0000000  
 D1 2.00000000 sec  
 D2 0.00344828 sec  
 D12 0.00002000 sec  
 TD0 1

----- CHANNEL f1 -----  
 NUC1 13C  
 P1 10.00 usec  
 P2 20.00 usec  
 PL1 4.00 dB  
 PL1W 31.79999924 W  
 SFO1 125.9262790 MHz

----- CHANNEL f2 -----  
 CPDPRG2 waltz16  
 NUC2 1H  
 P3 15.00 usec  
 P4 30.00 usec  
 PCPD2 80.00 usec  
 PL2 7.00 dB  
 PL12 21.54 dB  
 PL2W 6.01424694 W  
 PL12W 0.21143708 W  
 SFO2 500.7520030 MHz  
 SI 32768  
 SF 125.9136880 MHz  
 WDW EM  
 SSB 0  
 LB 1.00 Hz  
 GB 0  
 PC 1.40

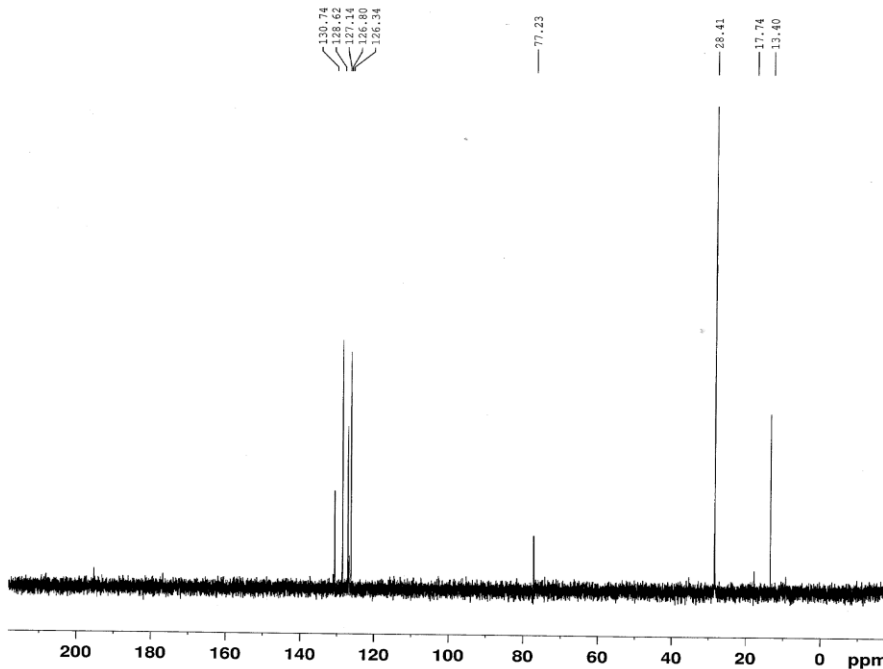

decIV-161-1  
Pulse Sequence: #2pul

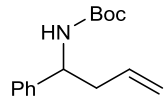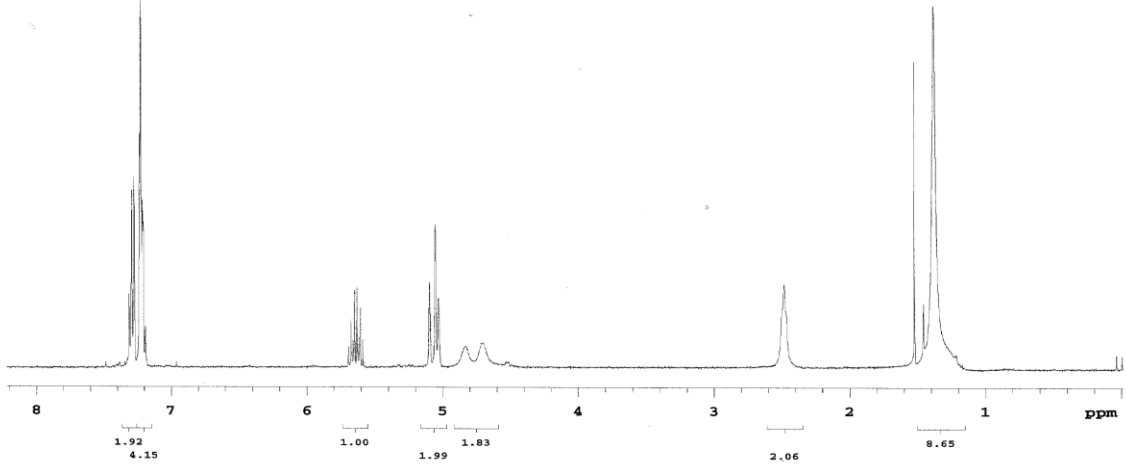

decIV-161-1carbon

133.89  
129.81  
127.15  
126.22  
118.23

77.24

41.26

28.38

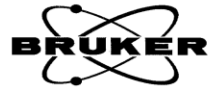

Current Data Parameters  
NAME IV-161-1  
EXPNO 11  
PROCNO 1

F2 - Acquisition Parameters  
Date\_ 20080130  
Time 12.25  
INSTRUM spect  
PROBHD 5 mm CPTCI 1H-  
PULPROG dept135  
TD 65536  
SOLVENT cdc13  
NS 256  
DS 4  
SWH 29761.904 Hz  
FIDRES 0.454131 Hz  
AQ 1.1010548 sec  
RG 16400  
DW 16.800 usec  
DE 6.50 usec  
TE 300.0 K  
CNST2 145.000000  
D1 2.0000000 sec  
d12 0.00002000 sec  
d2 0.00344828 sec  
DELTA 0.00001655 sec  
TD0 1

===== CHANNEL f1 =====  
NUC1 13C  
P1 13.00 usec  
P2 26.00 usec  
PL1 -0.90 dB  
SFO1 125.7703643 MHz  
===== CHANNEL f2 =====  
CPDPRG2 waltz16  
NUC2 1H  
P3 7.00 usec  
P4 14.00 usec  
PCPD2 70.00 usec  
PL12 26.10 dB  
PL2 6.10 dB  
SFO2 500.1320005 MHz

F2 - Processing parameters  
SI 32768  
SF 125.7577890 MHz  
WDW EM  
SSB 0  
LB 1.00 Hz  
GB 0  
PC 1.40

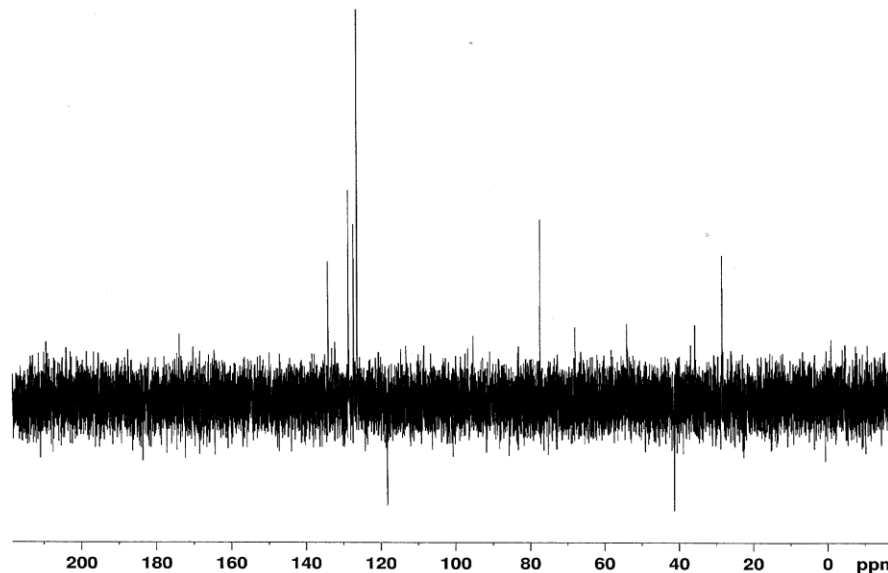

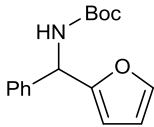

Relax. delay 1.100 sec  
 Pulse 50.0 degrees  
 Acq. time 1.892 sec  
 Width 10000.0 Hz  
 8 repetitions  
 OBSERVE H1, 499.7772154 MHz  
 DATA PROCESSING  
 FT size 65536  
 Total time 0 min, 30 sec

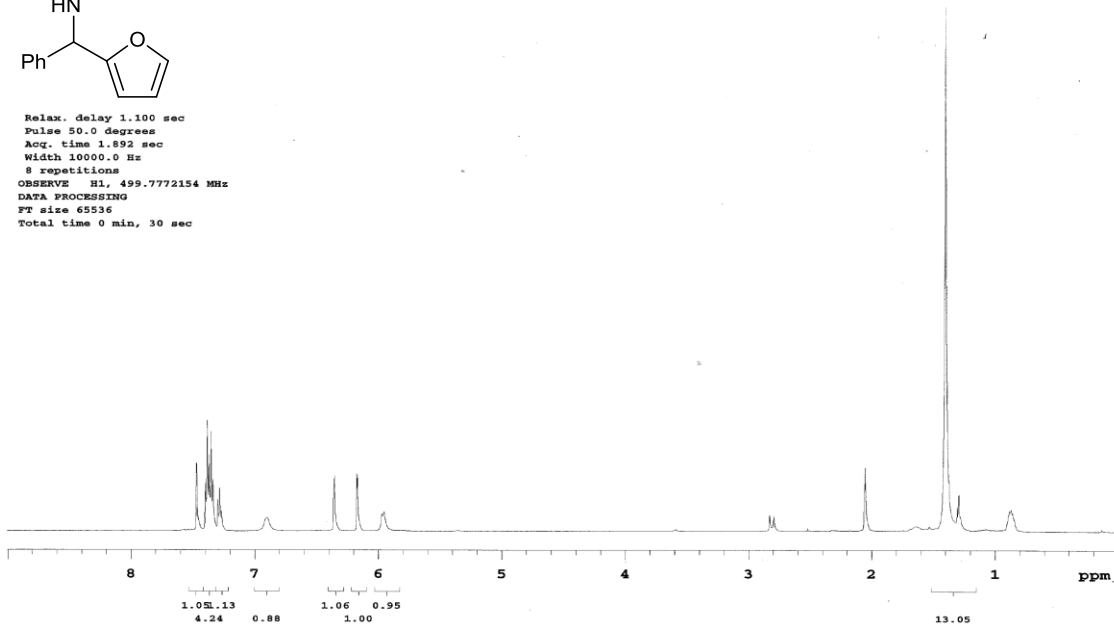

decIV-221-1  
 C13DEPT135 CDC13 /opt/topspin/carrera 117

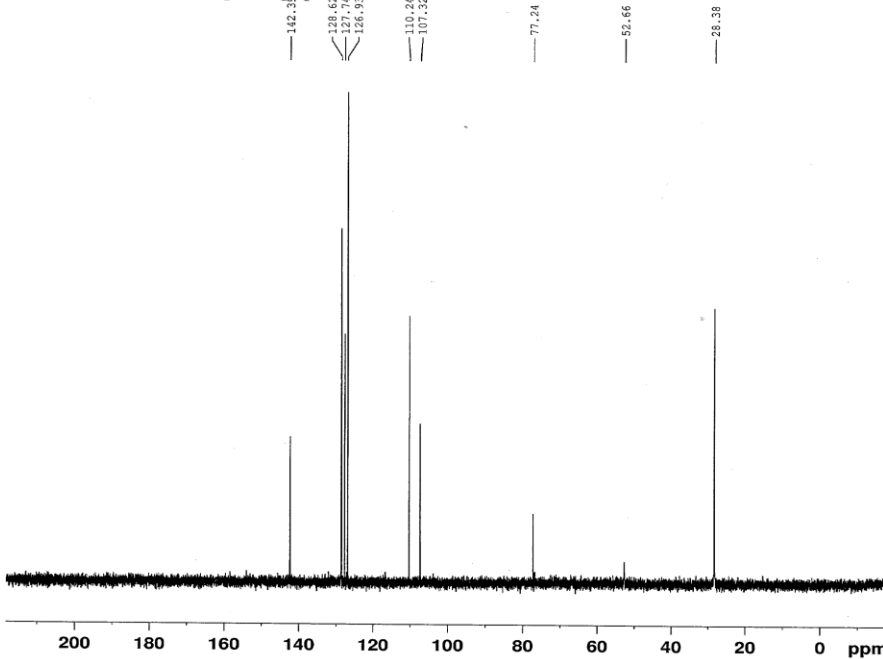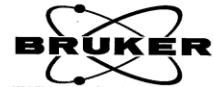

```

NAME      A2_117-decIV-221
EXPNO     1
PROCNO    1
Date_     20080429
Time      23.01
INSTRUM   spect
PROBHD    5 mm CPDCH 13C
PULPROG   dept135
TD         65536
SOLVENT   CDC13
NS         256
DS         4
SWH       29761.904 Hz
FIDRES    0.454131 Hz
AQ        1.1010548 sec
RG         512
DW        16.800 usec
DE        6.50 usec
TE        295.0 K
CNST2     145.000000
D1        2.00000000 sec
D2        0.00344828 sec
D12       0.00002000 sec
TD0       1

----- CHANNEL f1 -----
NUC1      13C
P1        8.20 usec
P2        16.40 usec
PL1       2.50 dB
PL1W      36.44347000 W
SF01      125.8515908 MHz

----- CHANNEL f2 -----
CPDPRG2   waltz16
NUC2      1H
P3        12.50 usec
P4        25.00 usec
PCPD2     80.00 usec
PL2       3.80 dB
PL12      19.92 dB
PL2W      11.83255291 W
PL12W     0.28912020 W
SF02      500.4550018 MHz
SI        32768
SF        125.8390070 MHz
WDW       EM
SSB       0
LB        1.00 Hz
GB        0
PC        1.40
  
```

decIV-186b-1

Pulse Sequence: s2pul  
Solvent: CDCl3  
Ambient temperature  
INOVA-400 "nmrsum-4"

Relax. delay 3.800 sec  
Pulse 42.4 degrees  
Acq. time 2.504 sec  
Width 6524.8 Hz  
16 repetitions  
OBSERVE F1, 399.7714702 MHz  
DATA PROCESSING  
F2 size 32768  
Total time 1 min, 53 sec

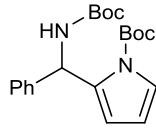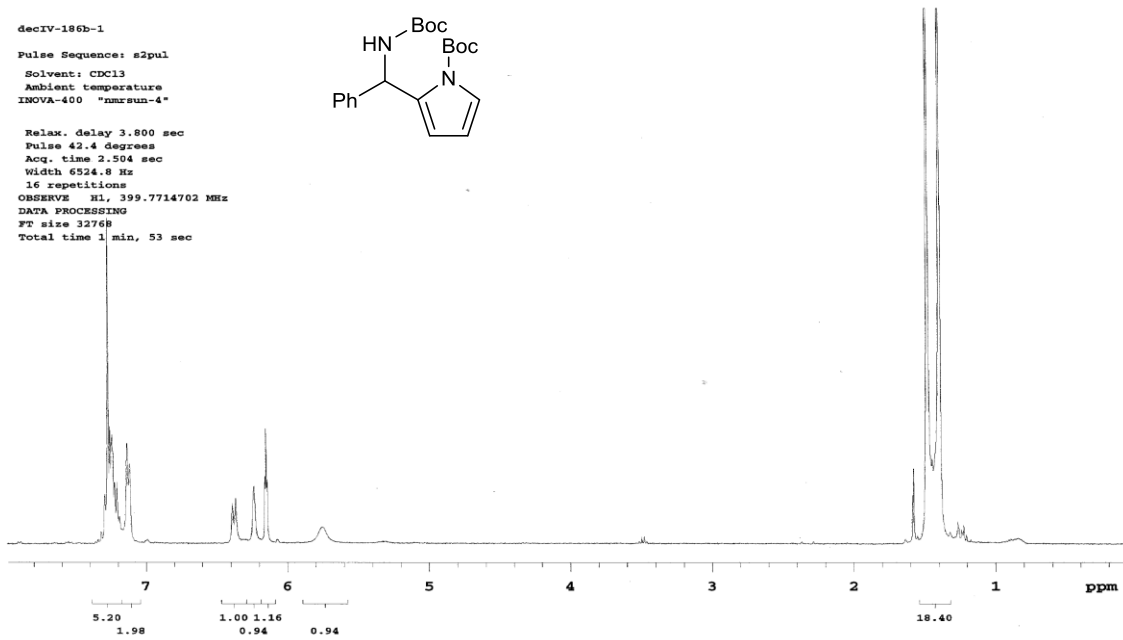

decIV-186b-1

132.15  
128.16  
128.52  
122.56  
114.26  
109.95

77.25

52.26

28.48  
27.97  
27.89

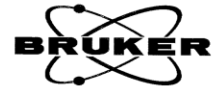

Current Data Parameters  
NAME IV-186b-1  
EXPNO 10  
PROCNO 1

F2 - Acquisition Parameters  
Date\_ 20080227  
Time 14.08  
INSTRUM spect  
PROBHD 5 mm CPTCI 1H-  
FULPROG dept135  
TD 65536  
SOLVENT CDCl3  
NS 256  
DS 4  
SWH 29761.904 Hz  
FIDRES 0.454131 Hz  
AQ 1.1010548 sec  
RG 16400  
DW 16.800 usec  
DE 5.50 usec  
TE 300.0 K  
CNST2 145.000000  
SI 2.0000000 sec  
d12 0.0002000 sec  
d2 0.00344828 sec  
DELTA 0.0001655 sec  
TDO 1

----- CHANNEL f1 -----  
NUC1 13C  
P1 13.00 usec  
P2 26.00 usec  
PL1 -0.90 dB  
SFO1 125.7703643 MHz

----- CHANNEL f2 -----  
CPDPRG2 waltz16  
NUC2 1H  
P3 7.00 usec  
P4 14.00 usec  
PCPD2 70.00 usec  
PL12 26.10 dB  
PL2 6.10 dB  
SFO2 500.1320005 MHz

F2 - Processing parameters  
SI 32768  
SF 125.7577890 MHz  
WDW EM  
SSB 0  
LB 1.00 Hz  
GB 0  
PC 1.40

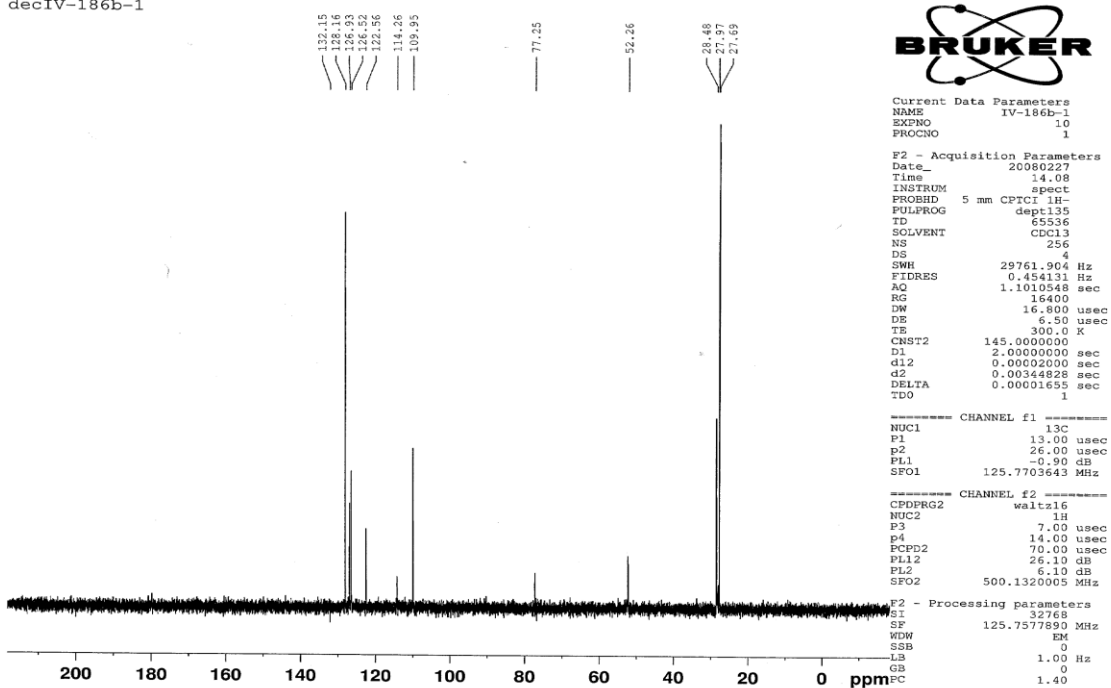



decIV-238a-1  
Pulse Sequence: s2pul  
Solvent: CDCl3  
Ambient temperature  
INNOVA-500 "mrsun-5"

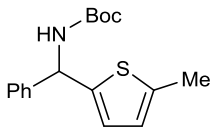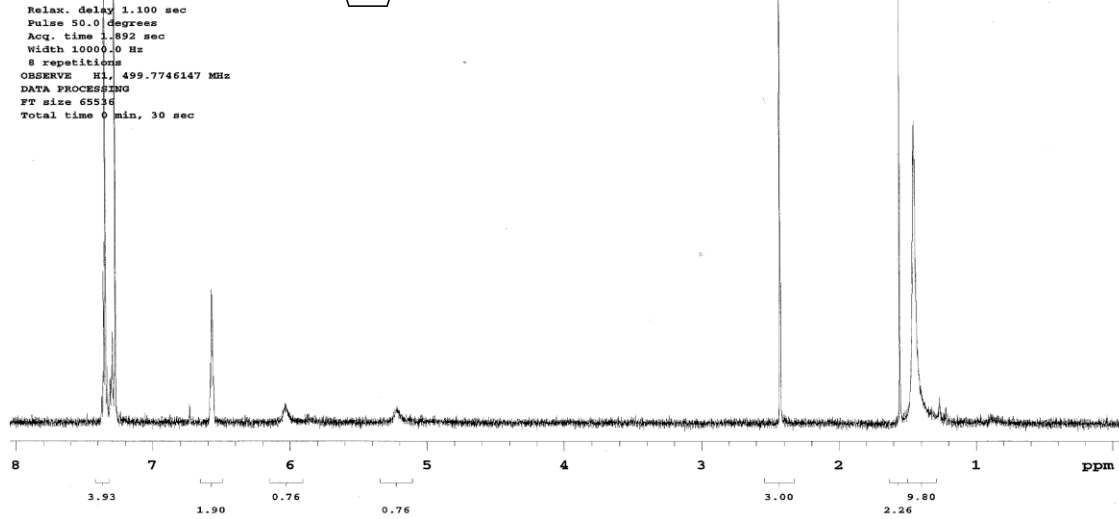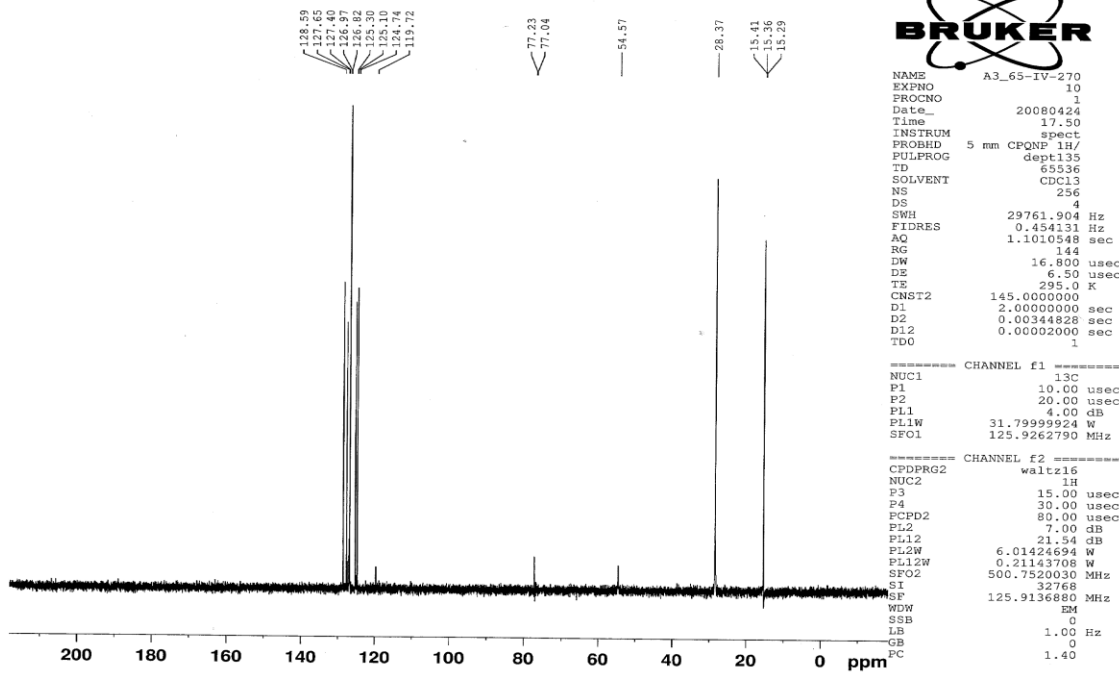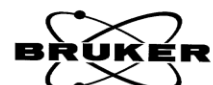

```

NAME      A3_65-IV-270
EXPNO     10
PROCNO    1
Date_     20080424
Time      17.50
INSTRUM   spect
PROBHD    5 mm CPQNP 1H/
PULPROG   dept135
TD         65536
SOLVENT   CDCl3
NS         256
DS         4
SWH        29761.904 Hz
FIDRES     0.454131 Hz
AQ         1.1010548 sec
RG         144
DW         16.800 usec
DE         6.50 usec
TE         295.0 K
CNST2     145.0000000
D1         2.0000000 sec
D2         0.00344828 sec
D12        0.00002000 sec
TD0        1

----- CHANNEL f1 -----
NUC1       13C
P1         10.00 usec
P2         20.00 usec
PL1        4.00 dB
PL1W       31.79999924 W
SFO1       125.9262790 MHz

----- CHANNEL f2 -----
CPDPRG2    waltz16
NUC2       1H
P3         15.00 usec
P4         30.00 usec
PCPD2      80.00 usec
PL2        7.00 dB
PL12       21.54 dB
PL2W       6.01424694 W
PL12W      0.21143708 W
SFO2       500.7520030 MHz
SI         32768
SF         125.9136880 MHz
WDW        EM
SSB        0
LB         1.00 Hz
GB         0
PC         1.40

```



decIV-116m  
Pulse Sequence: s2pul  
Solvent: CDCl3  
Ambient temperature  
INNOVA-400 "nmrsun-4"

Relax. delay 3.800 sec  
Pulse 42.4 degrees  
Acq. time 2.504 sec  
Width 6524.8 Hz  
16 repetitions  
OBSERVE F1: 399.7714702 MHz  
DATA PROCESSING  
FT size 32768  
Total time 1 min, 53 sec

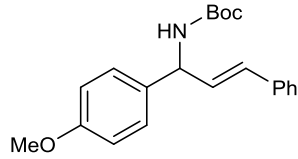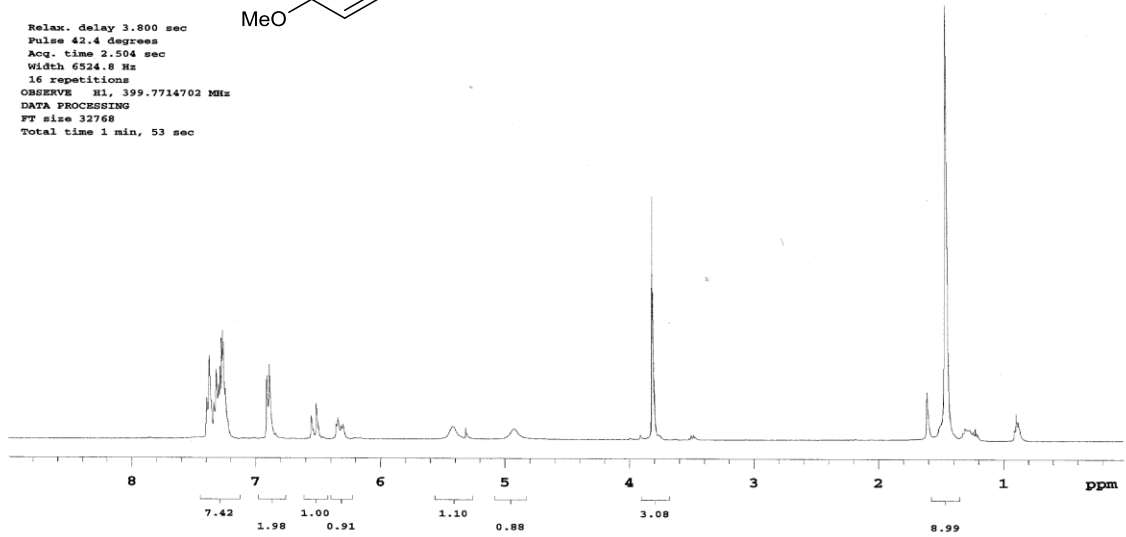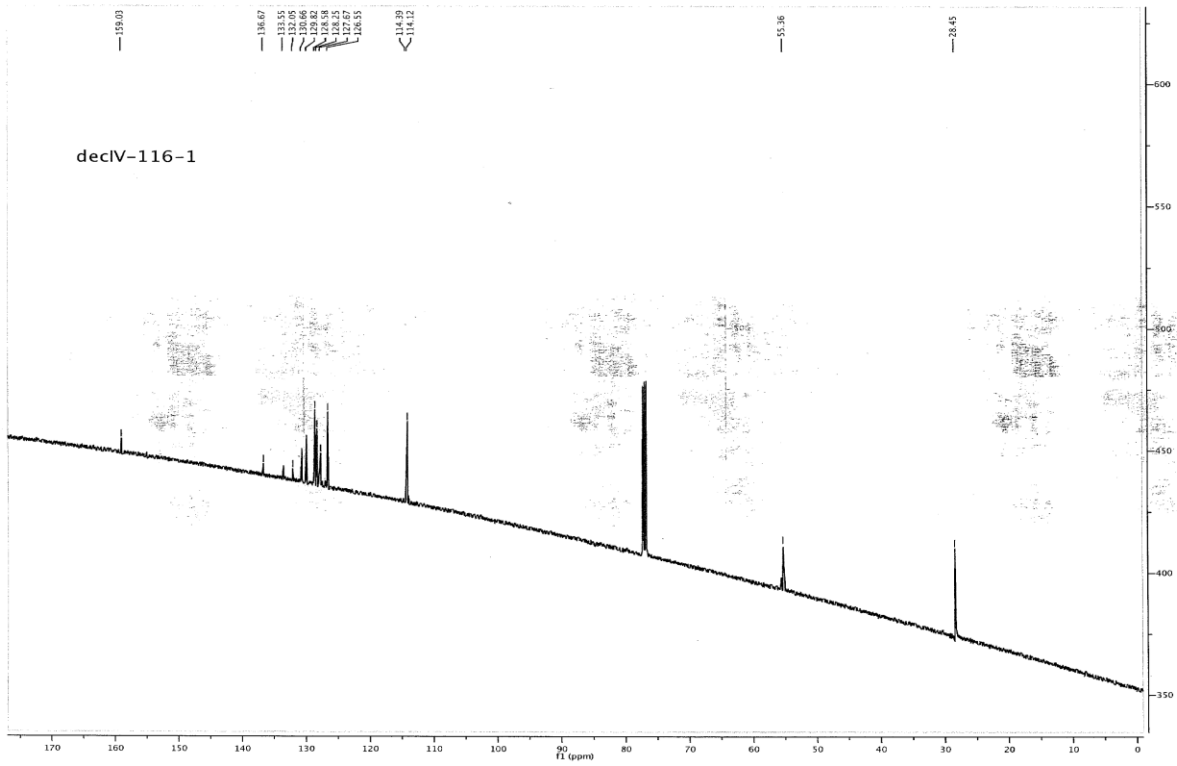

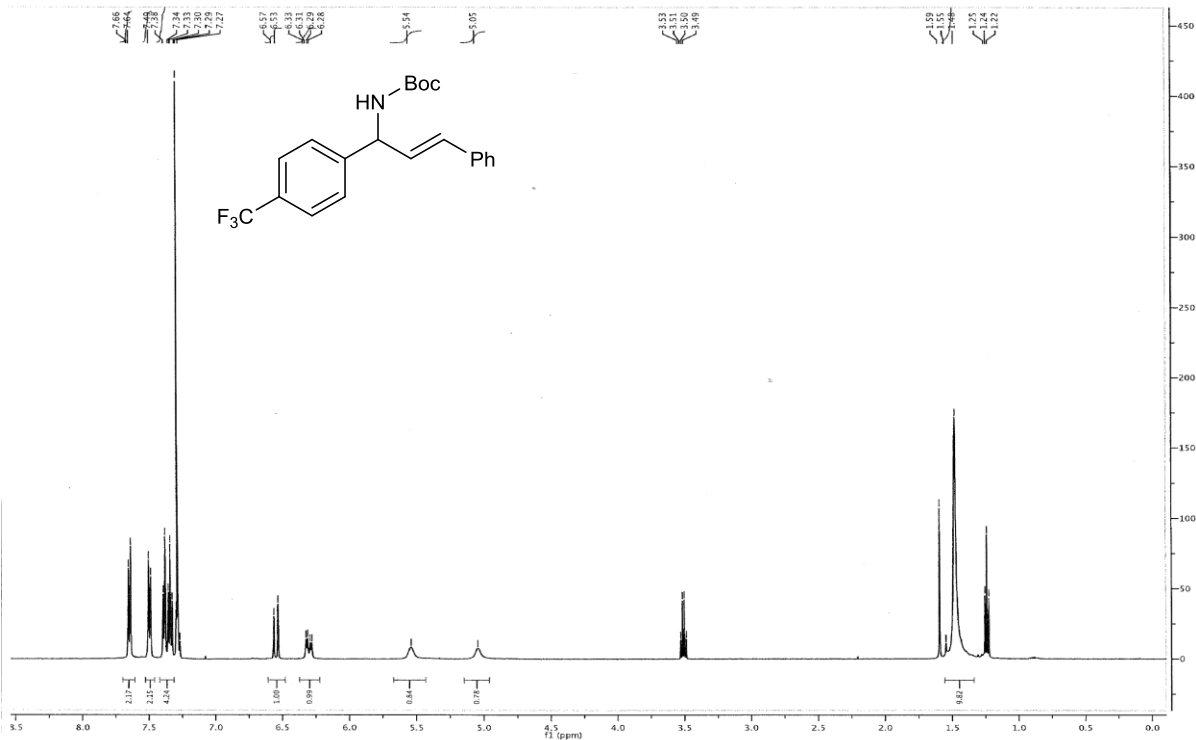

decVI-96-1c  
 C13DEPT135.PU CDC13 /opt/topspin dcarrera 31

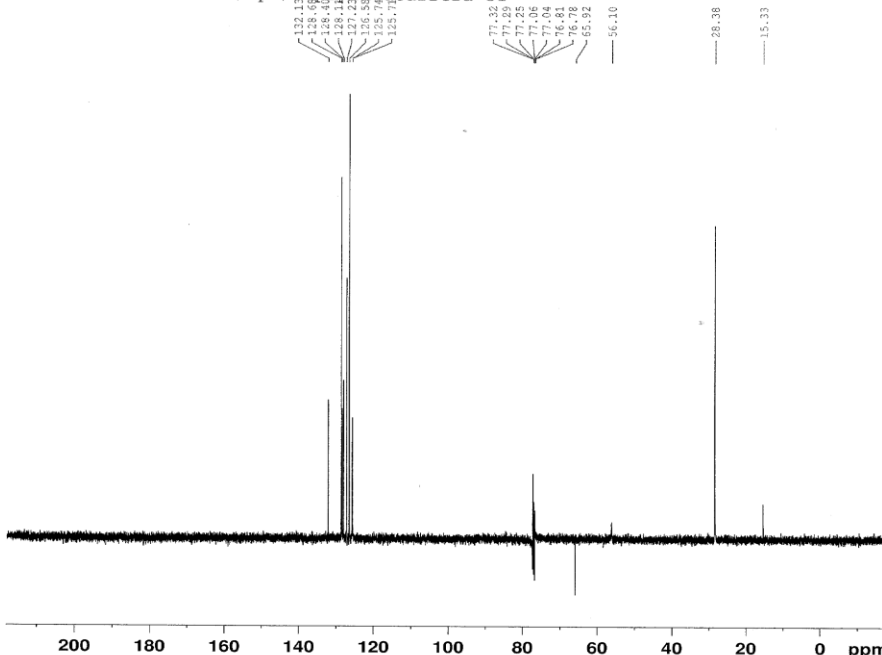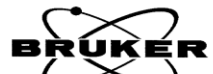

```

NAME          decVI-96
EXPNO         11
PROCNO        1
Date_         20090413
Time          11.36
INSTRUM       spect
PROBHD        5 mm CPDCH 13C
PULPROG       dept135
TD            65536
SOLVENT       CDC13
NS            256
DS            4
SWH           29761.904 Hz
FIDRES        0.454131 Hz
AQ            1.1010548 sec
RG            724
DW            16.800 usec
DE            6.50 usec
TE            295.0 K
CNST2         145.0000000
D1            2.0000000 sec
D2            0.00344828 sec
D12           0.00002000 sec
TDO           1

----- CHANNEL f1 -----
NUC1          13C
P1            8.20 usec
P2            16.40 usec
PL1           2.50 dB
PL1W          36.44347000 W
SFO1         125.8515908 MHz

----- CHANNEL f2 -----
CPDPRG2       waltz16
NUC2          1H
P3            12.50 usec
P4            25.00 usec
PCPD2         80.00 usec
PL2           3.80 dB
PL12          19.92 dB
PL2W          11.83255291 W
PL12W         0.28912020 W
SFO2         500.4550018 MHz
SI            32768
SF           125.8390070 MHz
WDW           EM
SSB           0
LB            1.00 Hz
GB            0
PC            1.40
  
```

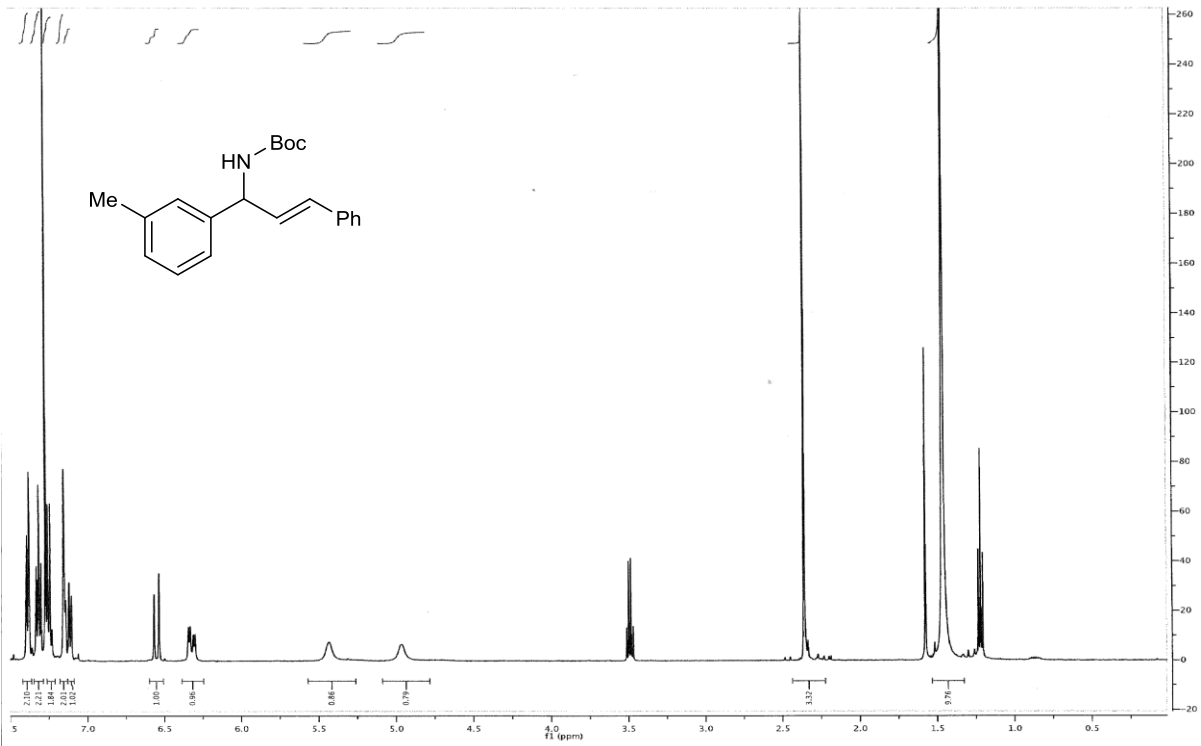

decVI-93-1c  
 C13DEPT135.PU CDCl3 /opt/topspin dcarrera 30

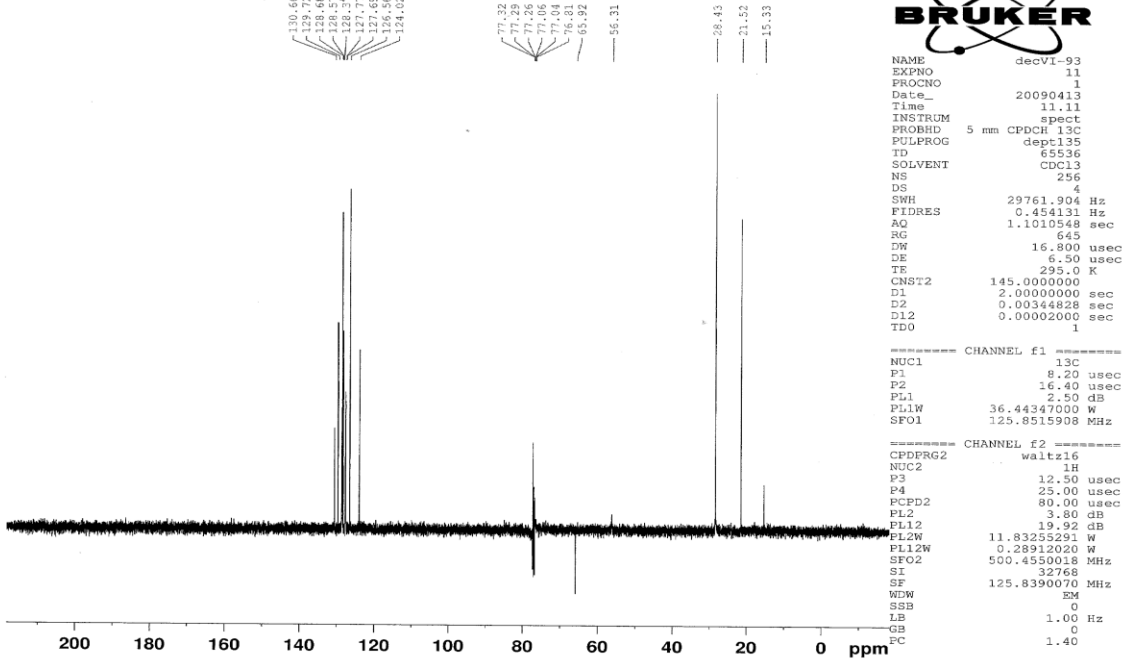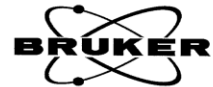

```

NAME          decVI-93
EXPNO         11
PROCNO        1
Date_         20090413
Time          11.11
INSTRUM       spect
PROBHD        5 mm CPDCH 13C
PULPROG       dept135
TD            65536
SOLVENT       CDCl3
NS            256
DS            4
SWH           29761.904 Hz
FIDRES        0.454131 Hz
AQ            1.1010548 sec
RG            645
DW            16.800 usec
DE            6.50 usec
TE            295.0 K
CNST2         145.0000000
D1            2.00000000 sec
D2            0.00344828 sec
D12           0.00002000 sec
TDO           1

===== CHANNEL f1 =====
NUC1          13C
P1            8.20 usec
P2            16.40 usec
PL1           2.50 dB
PL1W          36.44347000 W
SF01          125.8515908 MHz

===== CHANNEL f2 =====
CPDPRG2       waltz16
NUC2          1H
P3            12.50 usec
P4            25.00 usec
PCPD2         80.00 usec
PL2           3.80 dB
PL12          19.2 dB
PL2W          11.83255291 W
PL12W         0.28912020 W
SF02          500.4550018 MHz
SI            32768
SF            125.8390070 MHz
WDW           EM
SSB           0
LB            1.00 Hz
GB            0
PC            1.40
  
```

decIV-125-1  
Pulse Sequence: s2pul

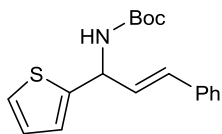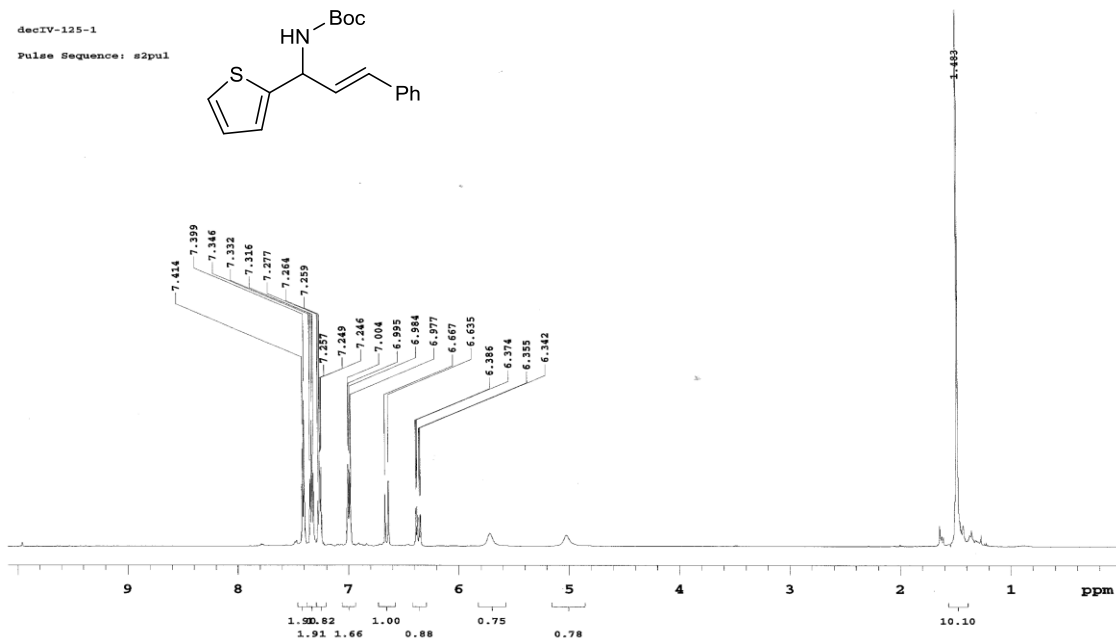

C13CPDp1.PU CDCl3 /opt/topspin dcarrera 33

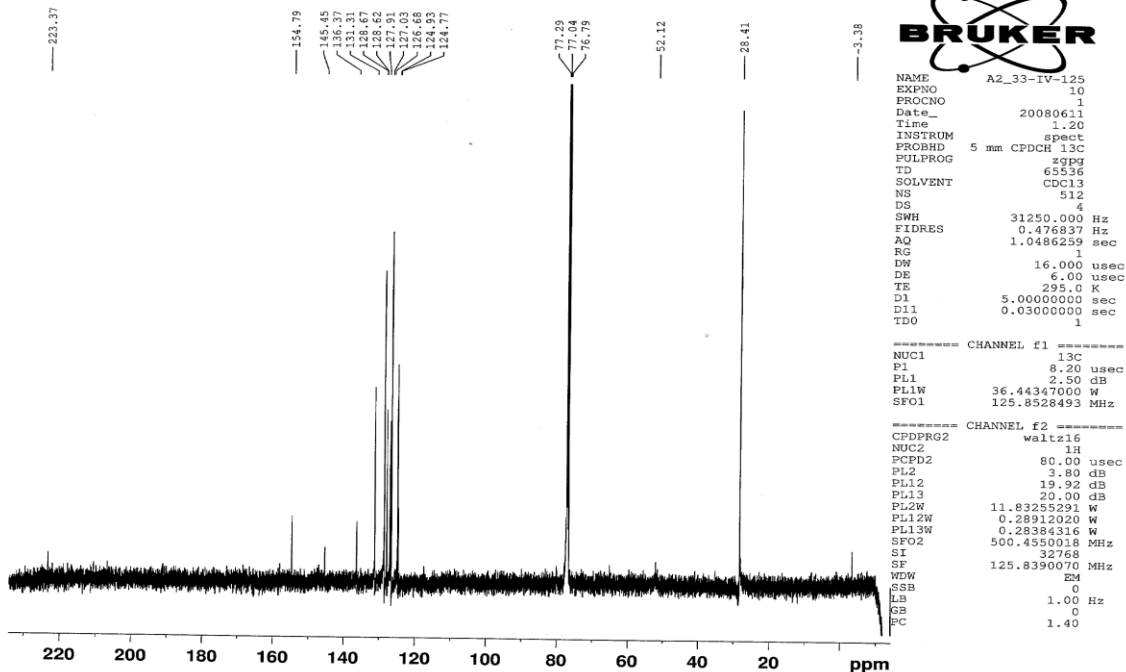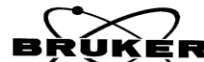

```

NAME      A2_33-IV-125
EXPNO     10
PROCNO    1
Date_     20080611
Time      1.20
INSTRUM   spect
PROBHD    5 mm CPDCH 13C
PULPROG   zgpg
TD         65536
SOLVENT   CDCl3
NS         512
DS         4
SWH        31250.000 Hz
FIDRES     0.476837 Hz
AQ         1.0486259 sec
RG         1
DW         16.000 usec
DE         6.00 usec
TE         295.0 K
D1         5.0000000 sec
D11        0.0300000 sec
TDO        1

===== CHANNEL f1 =====
NUC1       13C
P1         8.20 usec
PL1        2.50 dB
PL1W       36.44347000 W
SF01       125.8528493 MHz

===== CHANNEL f2 =====
CPDPRG2    waltz16
NUC2       1H
PCPD2      80.00 usec
PL2        3.80 dB
PL12       19.92 dB
PL13       20.00 dB
PL2W       11.83255291 W
PL12W      0.28912020 W
PL13W      0.28384316 W
SF02       500.4550018 MHz
SI         32768
SF         125.8390070 MHz
WDW        EM
GB         0
LB         1.00 Hz
GB         0
PC         1.40
  
```

decIV-124-1

Pulse Sequence: s2pul

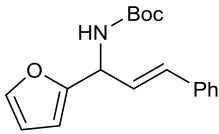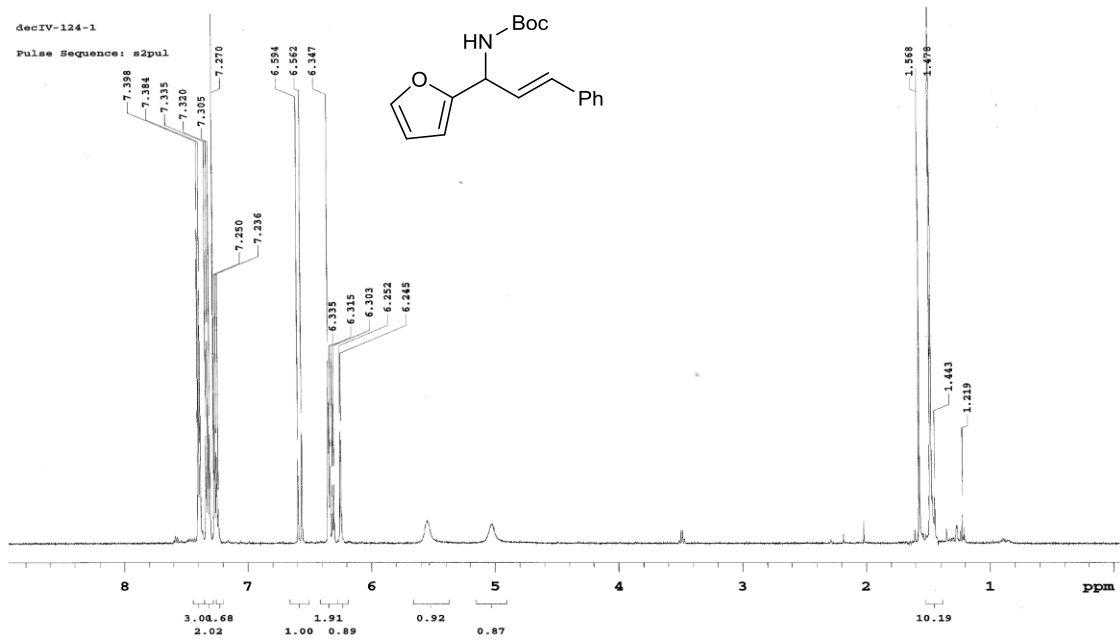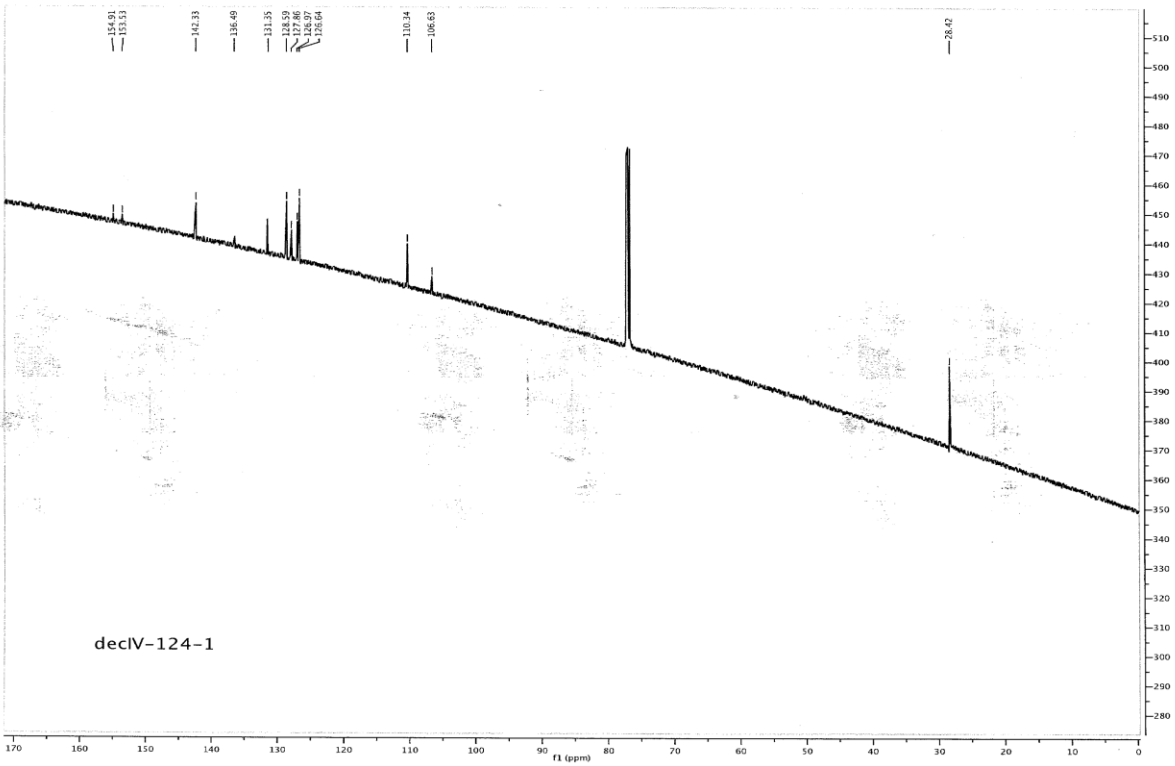

decIV-124-1

decIV-162-1  
Pulse Sequence: s2pul  
Solvent: CDCl3  
Ambient temperature  
INNOVA-400 "mrsun-4"  
Relax. delay 3.800 sec  
Pulse 42.4 degrees  
Acq. time 2.904 sec  
Width 6524.8 Hz  
16 repetitions  
OBSERVE F1, 399.7714698 MHz  
DATA PROCESSING  
FT size 32768  
Total time 1 min, 53 sec

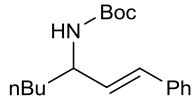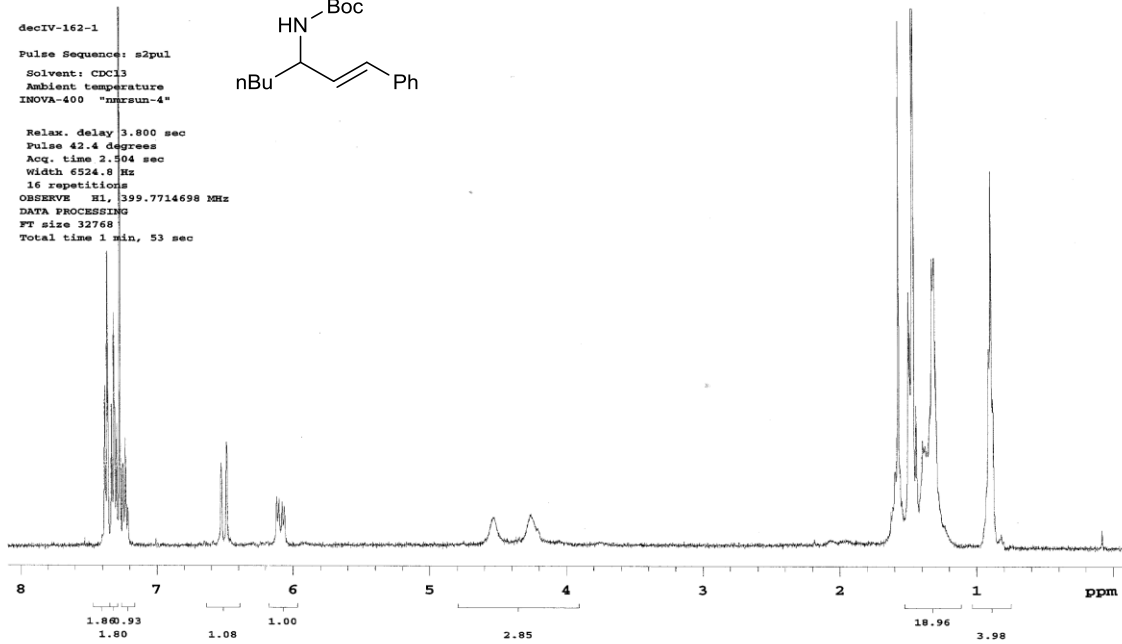

decIV-162-1

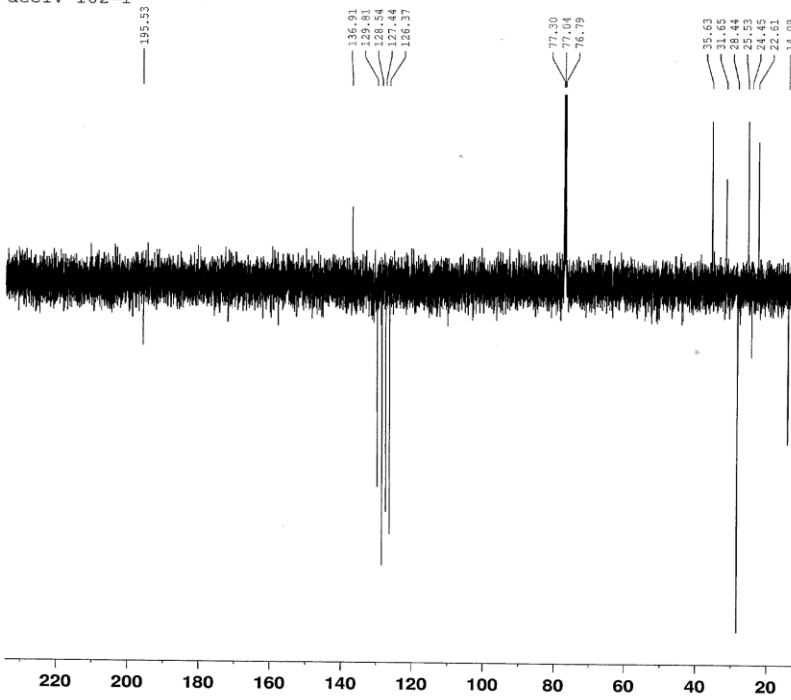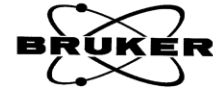

Current Data Parameters  
NAME al\_2  
EXPNO 10  
PROCNO 1

F2 - Acquisition Parameters  
Date\_ 20080201  
Time 11.50  
INSTRUM spect  
PROBHD 5 mm CPTCI 1H-  
PULPROG jmod  
TD 65536  
SOLVENT cdcl3  
NS 256  
DS 4  
SWH 31250.000 Hz  
FIDRES 0.476837 Hz  
AQ 1.0486259 sec  
RG 16400  
FW 16.000 usec  
DE 6.00 usec  
TE 295.0 K  
CNST11 1.0000000  
CNST2 145.0000000  
D1 3.0000000 sec  
d20 0.00689655 sec  
DELTA 0.00001655 sec  
TD0 1

----- CHANNEL f1 -----  
NUC1 13C  
P1 13.00 usec  
P2 26.00 usec  
PL1 -0.30 dB  
SFO1 125.7716218 MHz

----- CHANNEL f2 -----  
CPDPRG2 waltz16  
NUC2 1H  
PCPD2 70.00 usec  
PL12 26.10 dB  
PL2 6.10 dB  
SFO2 500.1320005 MHz

F2 - Processing parameters  
SI 131072  
SF 125.7577890 MHz  
WDW EM  
SSB 0  
LB 1.00 Hz  
GB 0  
PC 1.40



decIV-163-1  
Pulse Sequence: s2pul  
Solvent: CDCl3  
Ambient temperature  
INNOVA-400 "nmrsum-4"  
Relax. delay 3.800 sec  
Pulse 42.4 degrees  
Acq. time 2.504 sec  
Width 6524.8 Hz  
16 repetitions  
OBSERVE F1, 399.7714698 MHz  
DATA PROCESSING  
F2 size 32768  
Total time 1 min, 53 sec

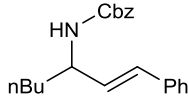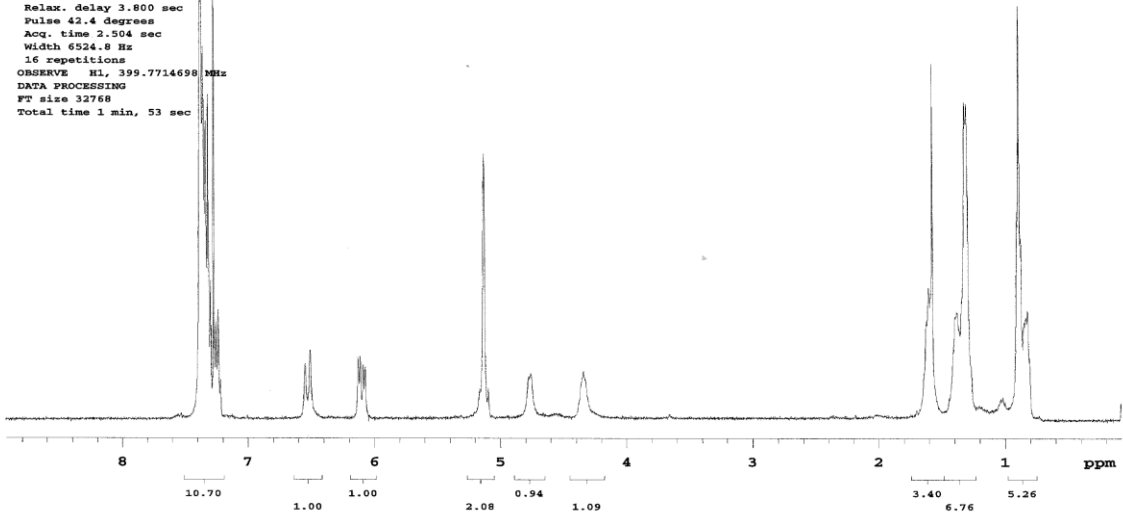

decIV-163-1

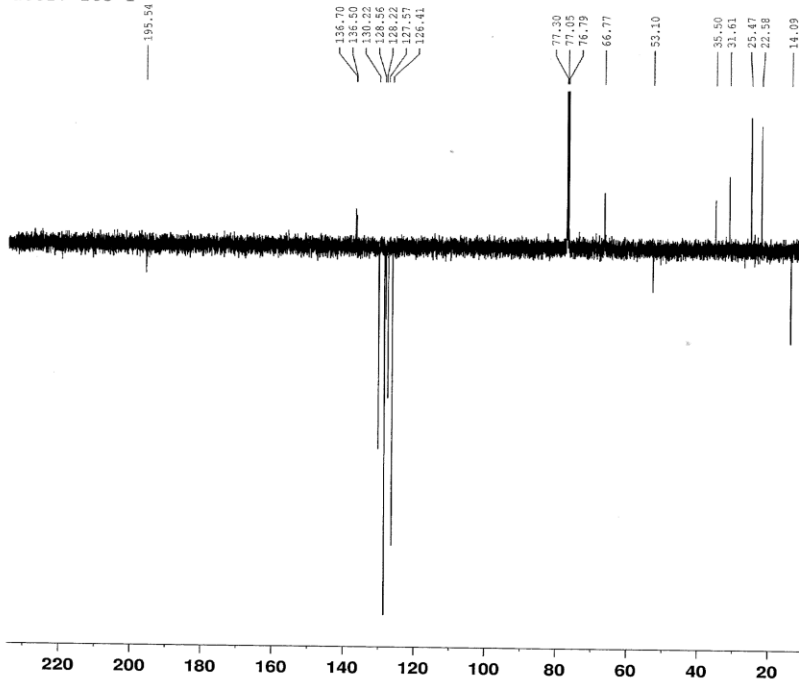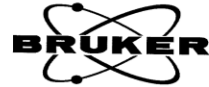

Current Data Parameters  
NAME Al\_3-  
EXPNO 10  
PROCNO 1

F2 - Acquisition Parameters  
Date\_ 20080201  
Time 12.10  
INSTRUM spect  
PROBHD 5 mm CPTCL 1H-  
PULPROG jmod  
TD 65536  
SOLVENT CDCl3  
NS 256  
DS 4  
SWH 31250.000 Hz  
FIDRES 0.476837 Hz  
AQ 1.0486259 sec  
RG 16400  
DW 16.000 usec  
DE 6.00 usec  
TE 295.0 K  
CNST11 1.0000000  
CNST2 145.0000000  
D1 3.0000000 sec  
d20 0.00689655 sec  
DELTA 0.00001655 sec  
TDD 1

----- CHANNEL f1 -----  
NUC1 13C  
P1 13.00 usec  
P2 26.00 usec  
PL1 -0.90 dB  
SFO1 125.7716218 MHz

----- CHANNEL f2 -----  
CPDPRG2 waltz16  
NUC2 1H  
PCPD2 70.00 usec  
PL2 26.10 dB  
PL2 6.10 dB  
SFO2 500.1320005 MHz

F2 - Processing parameters  
SI 131072  
SF 125.7577890 MHz  
WDW EM  
SSB 0  
LB 1.00 Hz  
GB 0  
PC 1.40

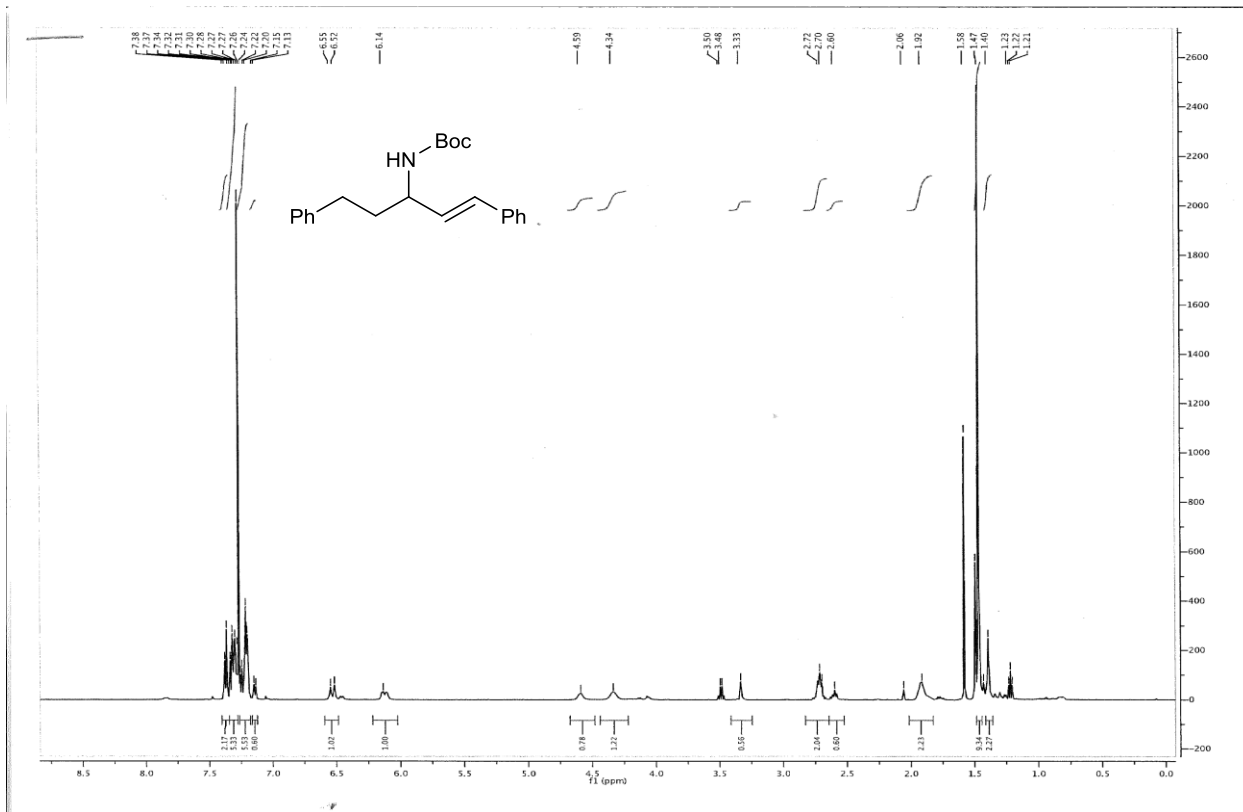

decIV-76-1  
 C13CPDpl.PU CDCl3 /opt/topspin dcr 92

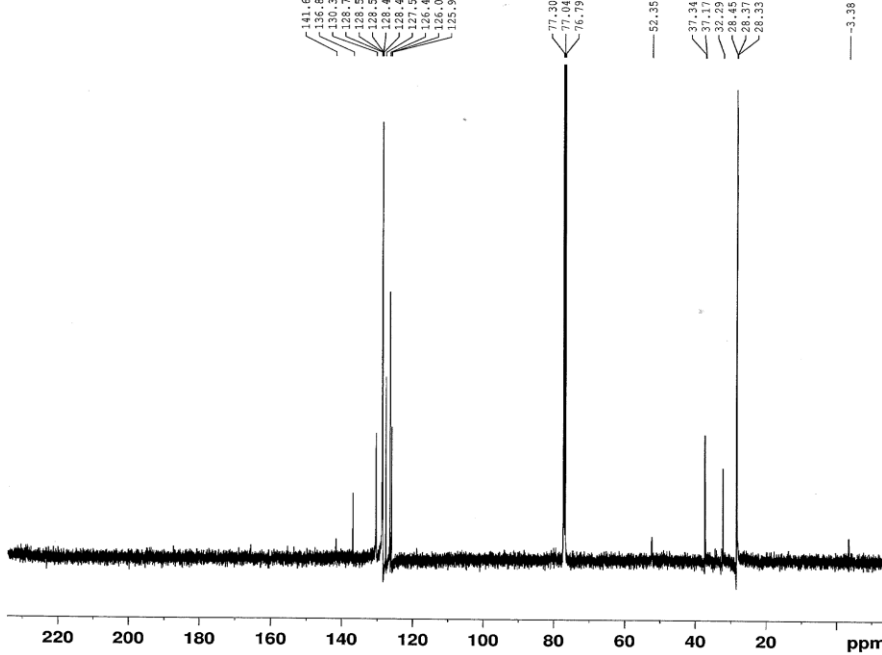

**BRUKER**

NAME A2\_92-decIV-76  
 EXPNO 10  
 PROCNO 1  
 Date\_ 20080610  
 Time 0.42  
 INSTRUM spect  
 PROBHD 5 mm CPDCH 13C  
 PULPROG zgpg  
 TD 65536  
 SOLVENT CDCl3  
 NS 512  
 DS 4  
 SWH 31250.000 Hz  
 FIDRES 0.476837 Hz  
 AQ 1.0486259 sec  
 RG 1  
 DW 16.000 usec  
 DE 6.00 usec  
 TE 295.0 K  
 D1 5.0000000 sec  
 D11 0.0300000 sec  
 TDO 1

----- CHANNEL f1 -----  
 NUC1 13C  
 P1 8.20 usec  
 PL1 2.50 dB  
 PL1W 36.44347000 W  
 SF01 125.8528493 MHz

----- CHANNEL f2 -----  
 CPDPRG2 waltz16  
 NUC2 1H  
 PCPD2 80.00 usec  
 PL2 3.80 dB  
 PL12 19.92 dB  
 PL13 20.00 dB  
 PL2W 11.83255291 W  
 PL12W 0.28912020 W  
 PL13W 0.28364316 W  
 SF02 500.4550018 MHz  
 SI 32768  
 SF 125.8390070 MHz  
 WDW EM  
 SSB 0  
 LB 1.00 Hz  
 GB 0  
 PC 1.40



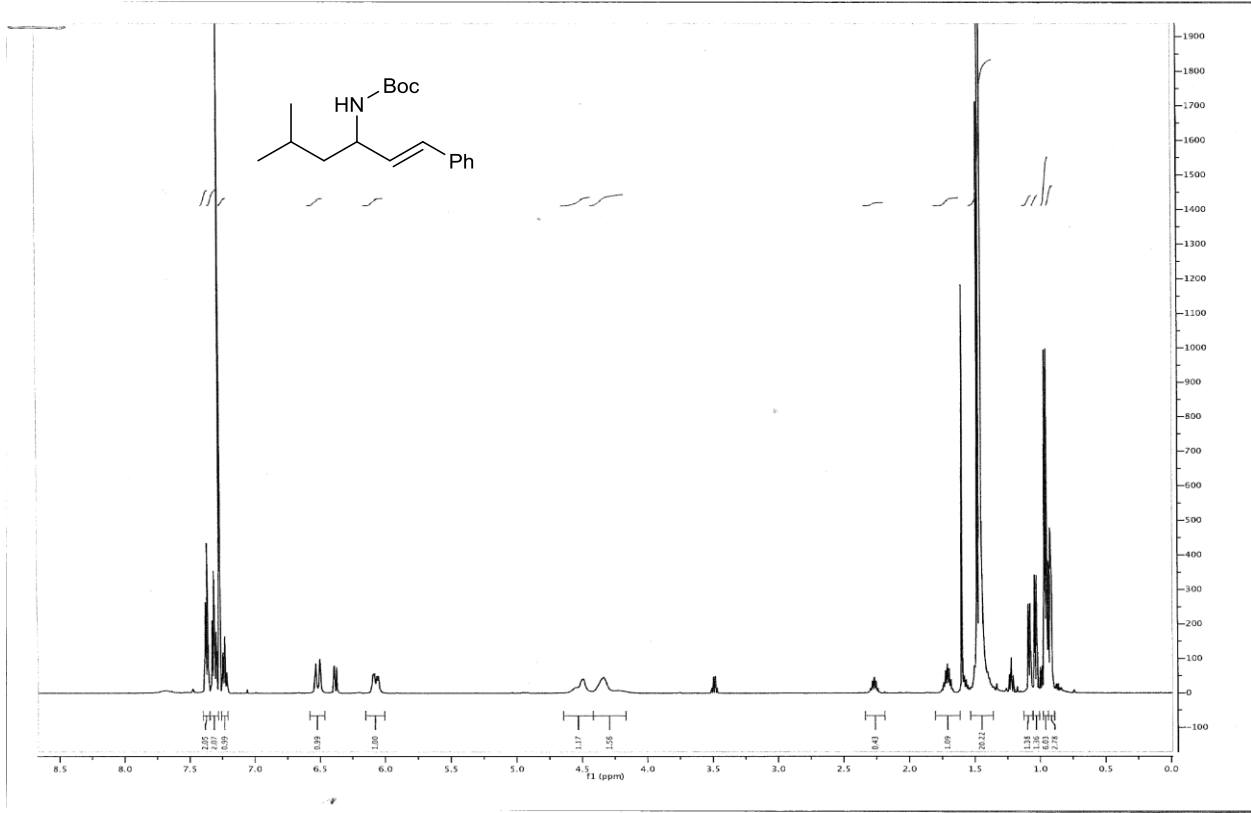

decIV-101-1 carbon

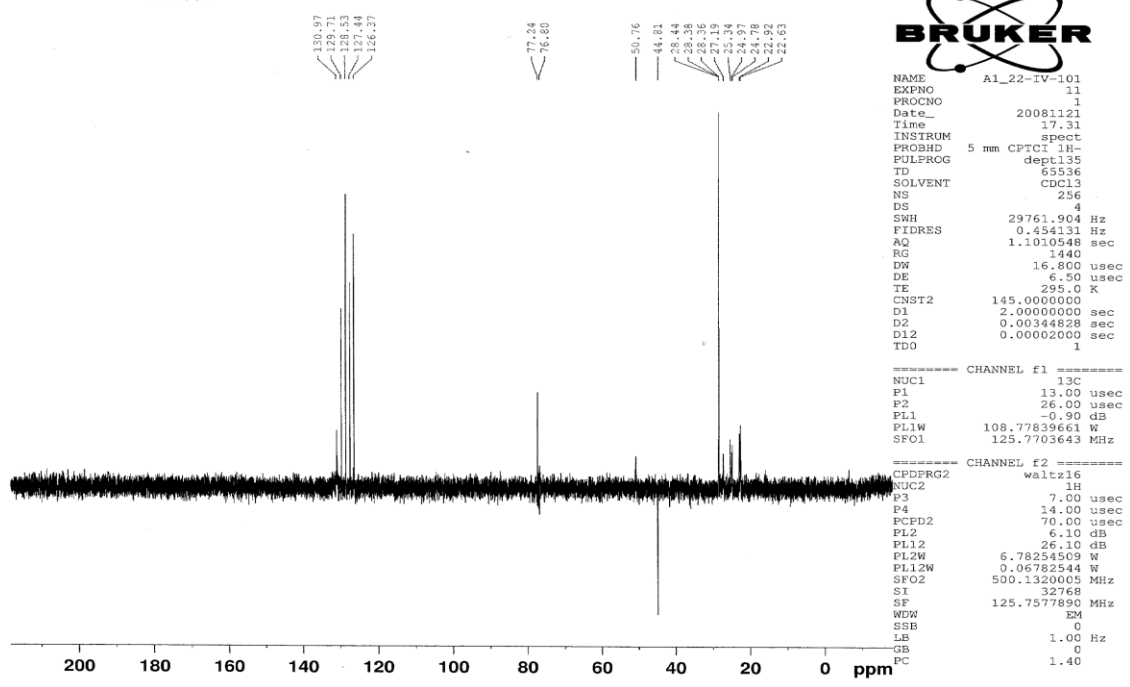

decVI-110a-1

Pulse Sequence: s2pul  
Solvent: CDCl3  
Ambient temperature  
INNOVA-500 "nmrsm-5"

Relax. delay 1.100 sec  
Pulse 50.0 degrees  
Acq. time 1.892 sec  
Width 10000.0 Hz  
8 repetitions

OBSERVE F1, 499.7746153 MHz  
DATA PROCESSING  
FT size 65536  
Total time 0 min, 30 sec

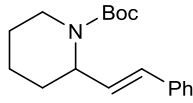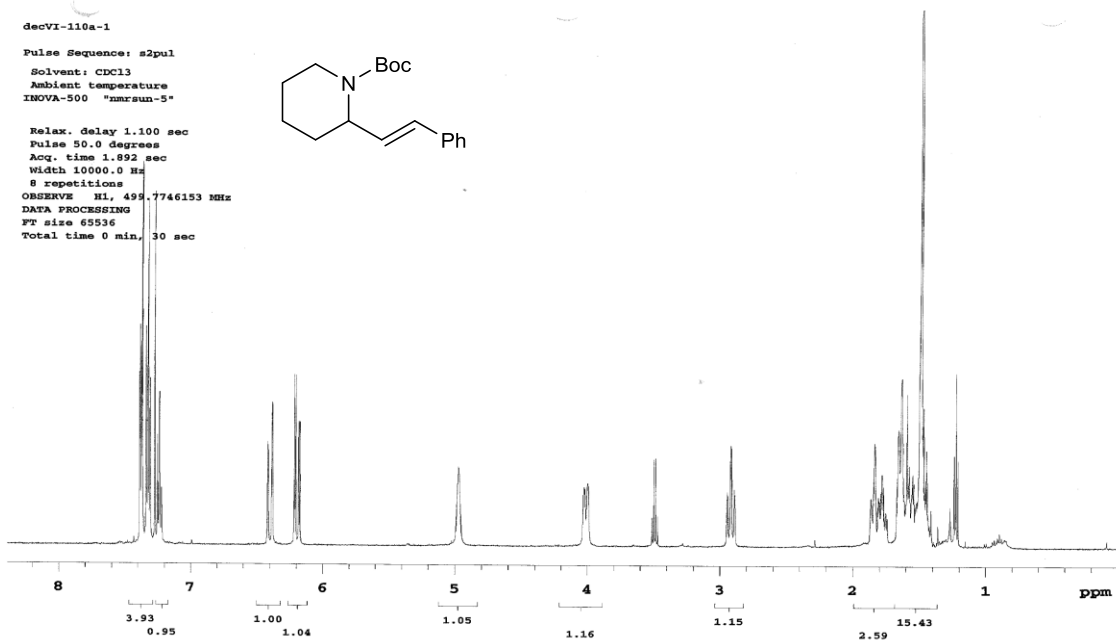

decVI-110a-1carbon

130.70  
128.74  
128.58  
127.39  
126.25

79.49  
77.30  
77.04  
76.75

29.54  
28.50  
25.58  
19.71

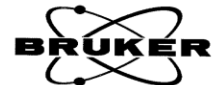

NAME decVI-110-1  
EXPNO 10  
PROCNO 1  
Date\_ 20090608  
Time 19.00  
INSTRUM spect  
PROBHD 5 mm CPQNP 1H/  
PULPROG jmod  
TD 65536  
SOLVENT CDCl3  
NS 256  
DS 4  
SWH 31250.000 Hz  
FIDRES 0.476837 Hz  
AQ 1.0486259 sec  
RG 144  
DM 16.000 usec  
DE 6.50 usec  
TE 295.0 K  
CNST2 145.000000  
CNST11 1.000000  
D1 2.0000000 sec  
D20 0.00689655 sec  
TD0 1

===== CHANNEL f1 =====  
NUC1 13C  
P1 10.00 usec  
P2 20.00 usec  
PL1 4.00 dB  
PL1W 31.79999924 W  
SFO1 125.9275385 MHz

===== CHANNEL f2 =====  
CPDPRG2 waltz16  
NUC2 1H  
PCPD2 80.00 usec  
PL2 7.00 dB  
PL12 21.54 dB  
PL2W 6.01424694 W  
PL12W 0.21143708 W  
SFO2 500.7520030 MHz  
SI 32768  
SF 125.9136890 MHz  
WDW EM  
SSB 0  
LB 1.00 Hz  
GB 0  
PC 1.40

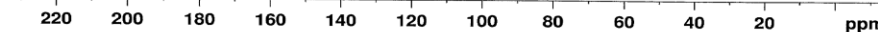

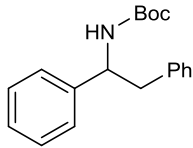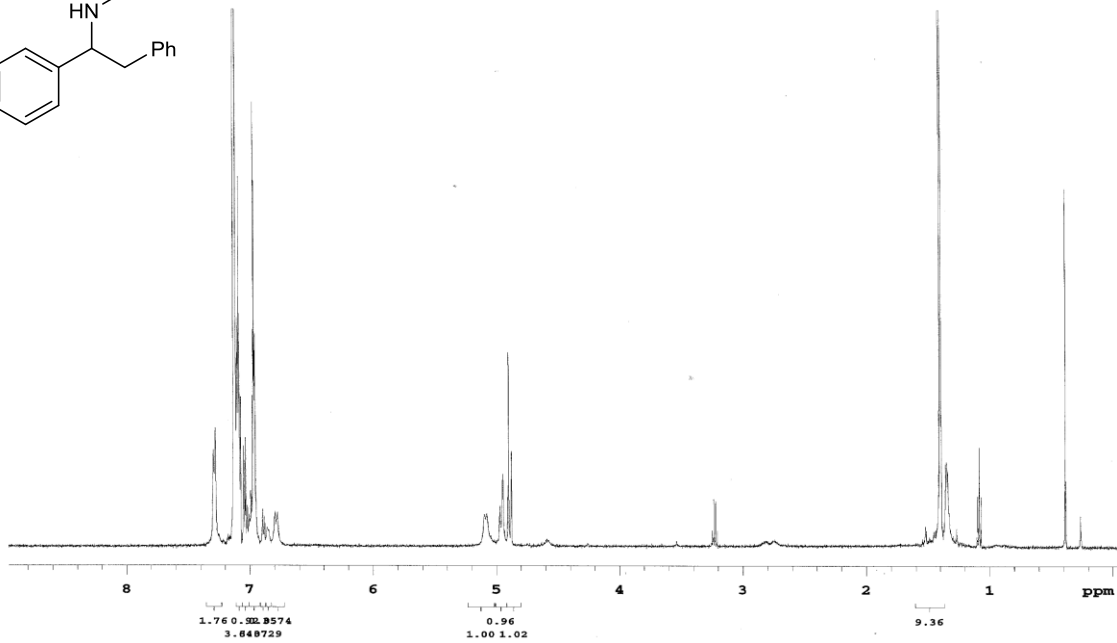

decV-20-3  
C13CPDpl.PU CDC13 /opt/topspin/decv-20-3

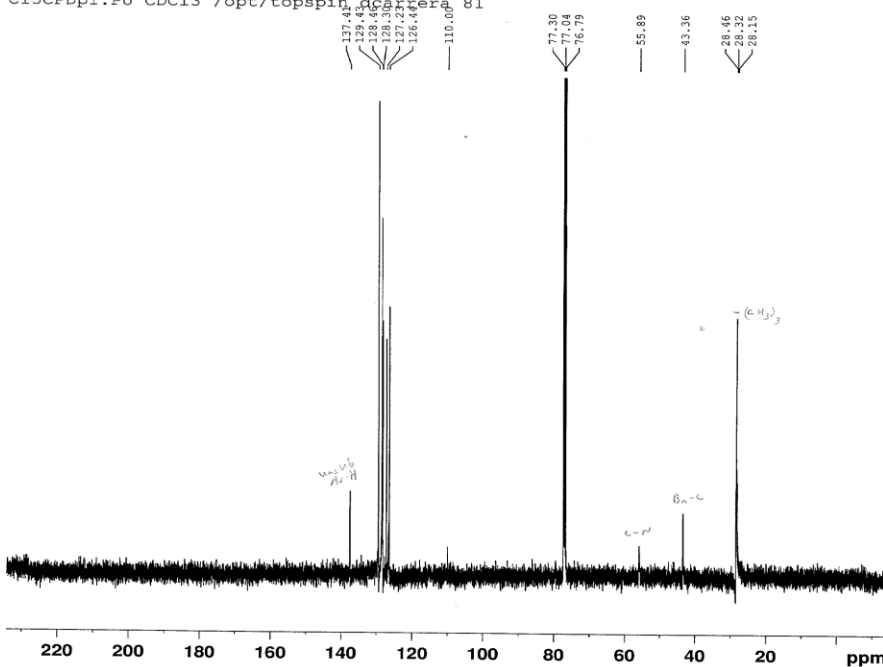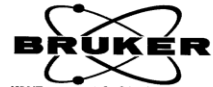

```

NAME      A2_81-decv-20
EXPNO     10
PROCNO    1
Date_     20080531
Time      16.59
INSTRUM   spect
PROBHD    5 mm CPDCH 13C
PULPROG   zgpg
TD         65536
SOLVENT   CDC13
NS         1024
DS         4
SWH       31250.000 Hz
FIDRES    0.476837 Hz
AQ         1.0486259 sec
RG         1
DW         16.000 usec
DE         6.00 usec
TE         295.0 K
D1         2.0000000 sec
D11        0.0300000 sec
TDO        1

===== CHANNEL f1 =====
NUC1       13C
P1         8.20 usec
PL1        2.50 dB
PL1W       36.44347000 W
SF01       125.8528493 MHz

===== CHANNEL f2 =====
CPDPRG2    waltz16
NUC2       1H
PCPD2      80.00 usec
PL2        3.80 dB
PL12       19.92 dB
PL13       20.00 dB
PL2W       11.83255291 W
PL12W      0.28912020 W
PL13W      0.28364316 W
SF02       500.4550018 MHz
SI         32768
SF         125.8390070 MHz
WDW        EM
SSB        0
LB         1.00 Hz
GB         0
PC         1.40
  
```

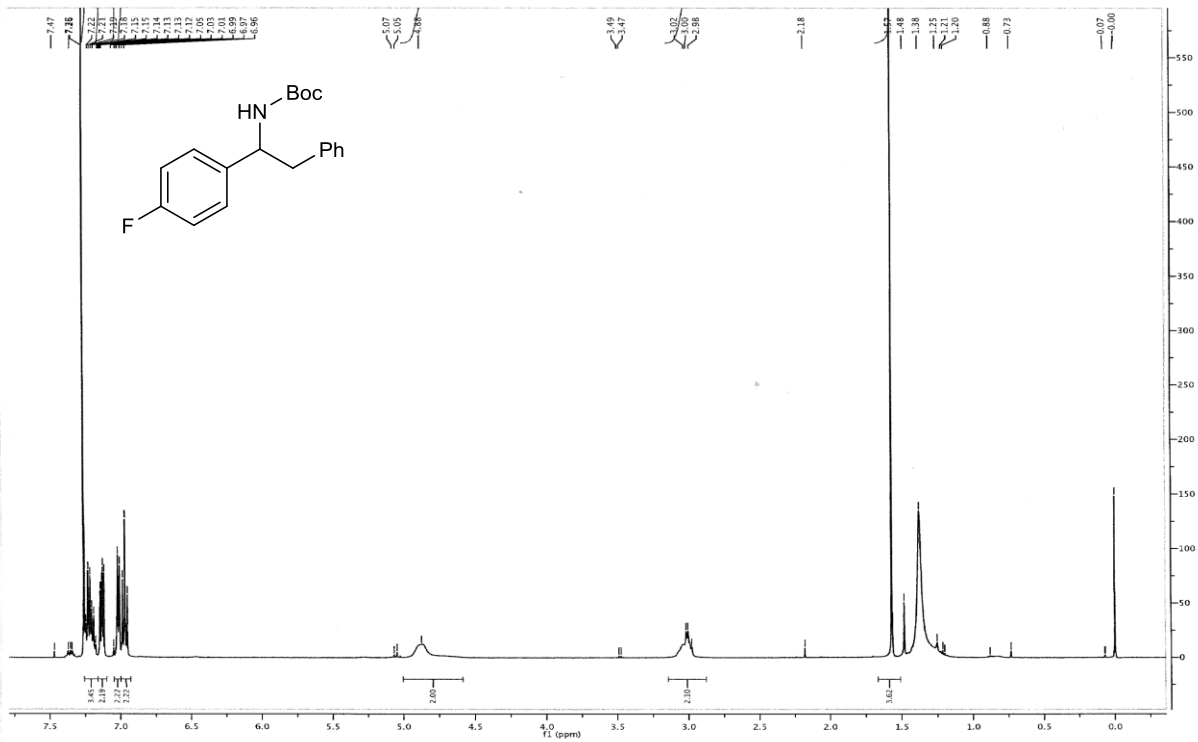

decV-274-1carbon

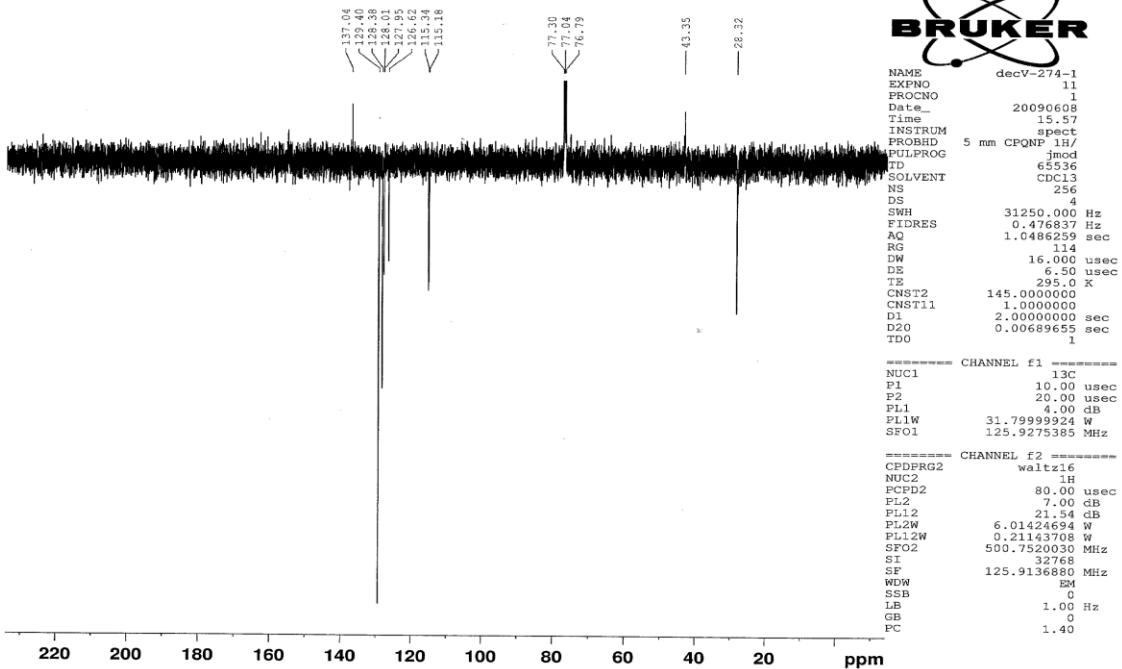





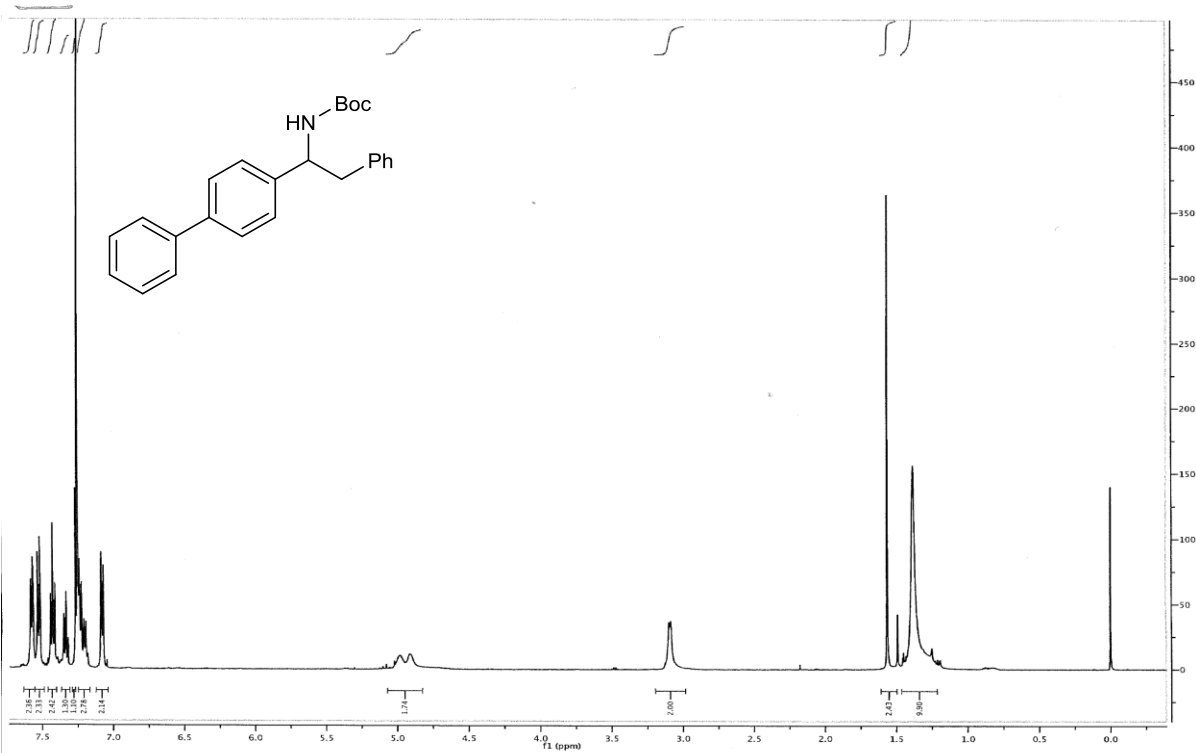

decV-270-1carbon

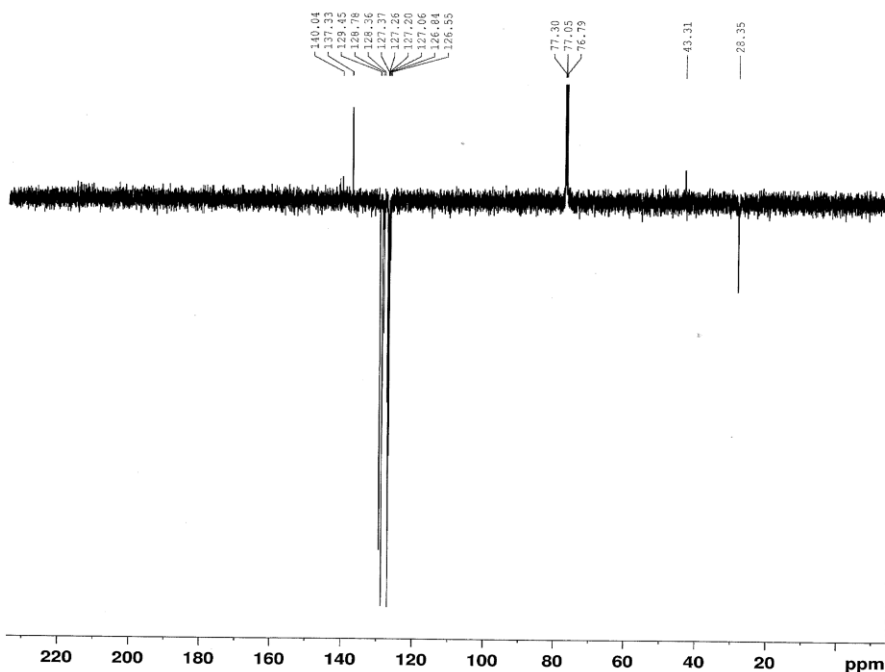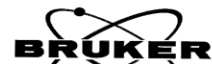

```

NAME      decV-270-1
EXPNO     11
PROCNO    1
Date_     20090608
Time      15.35
INSTRUM   spect
PROBHD    5 mm CPQNP 1H/
PULPROG   3mod
TD         65536
SOLVENT   CDCl3
NS         256
DS         4
SWH       31250.000 Hz
FIDRES    0.476837 Hz
AQ         1.0486259 sec
RG         114
DW         16.000 usec
DE         6.50 usec
TE         295.0 K
CNST2     145.0000000
CNST11    1.0000000
D1         2.0000000 sec
D20        0.00689655 sec
TD0        1
  
```

```

----- CHANNEL f1 -----
NUC1      13C
P1        10.00 usec
P2        20.00 usec
PL1       4.00 dB
PL1W      31.79999924 W
SFO1      125.9275385 MHz
  
```

```

----- CHANNEL f2 -----
CPDPRG2   waltz16
NUC2      1H
PCPD2     80.00 usec
PL2       7.00 dB
PL12      21.54 dB
PL2W      6.01424694 W
PL12W     0.21143708 W
SFO2      500.7520030 MHz
SI         32768
SF         125.9136880 MHz
WDW        EM
SSB        0
LB         1.00 Hz
GB         0
PC         1.40
  
```

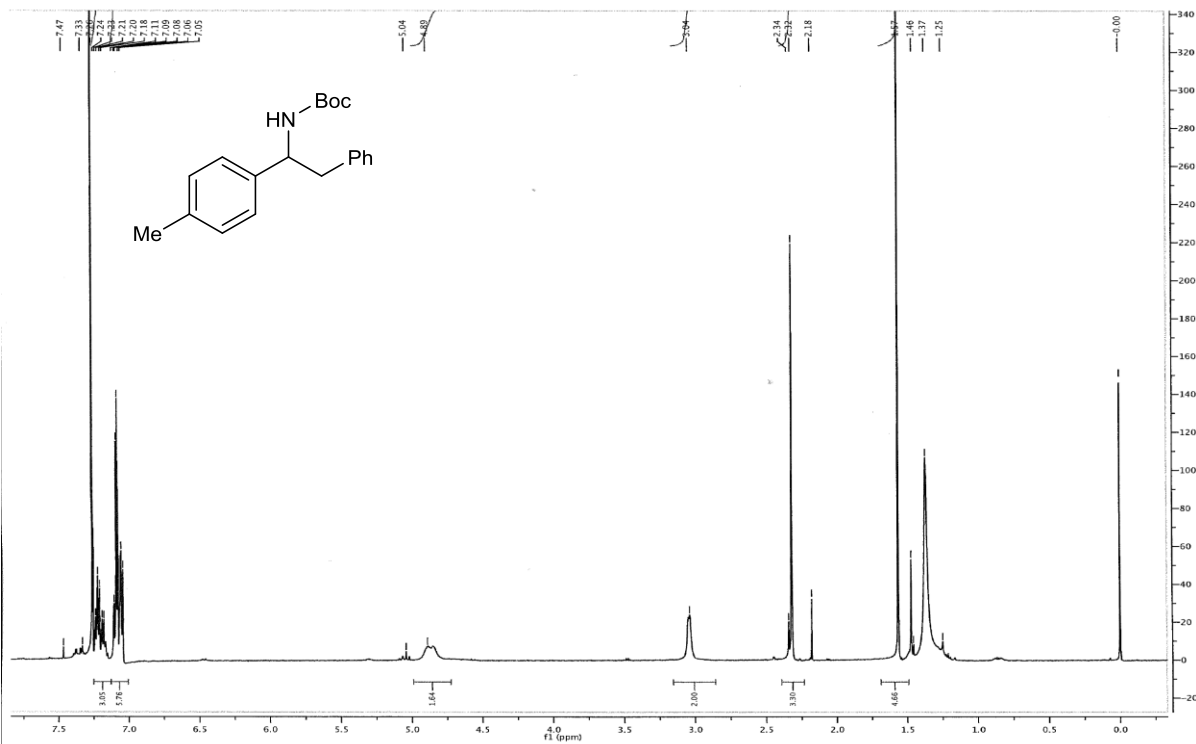

decVI-43-1carbon

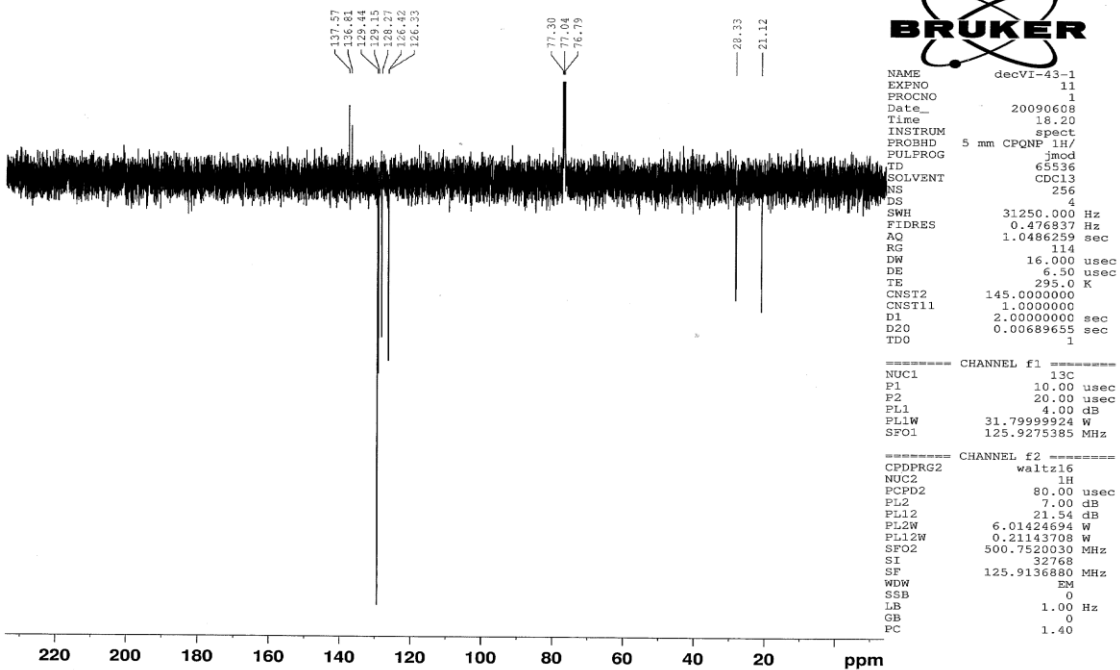





decIV-273-1

Pulse Sequence: s2pul  
Solvent: CDCl3  
Ambient temperature  
Mercury-300BB "mmsun-3"

Relax. delay 3.800 sec  
Pulse 16.5 degrees  
Acq. time 2.500 sec  
Width 6600.7 Hz  
16 repetitions  
OBSERVE H1, 300.0560323 MHz  
DATA PROCESSING  
F2 size 65536  
Total time 2 min, 7 sec

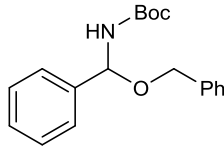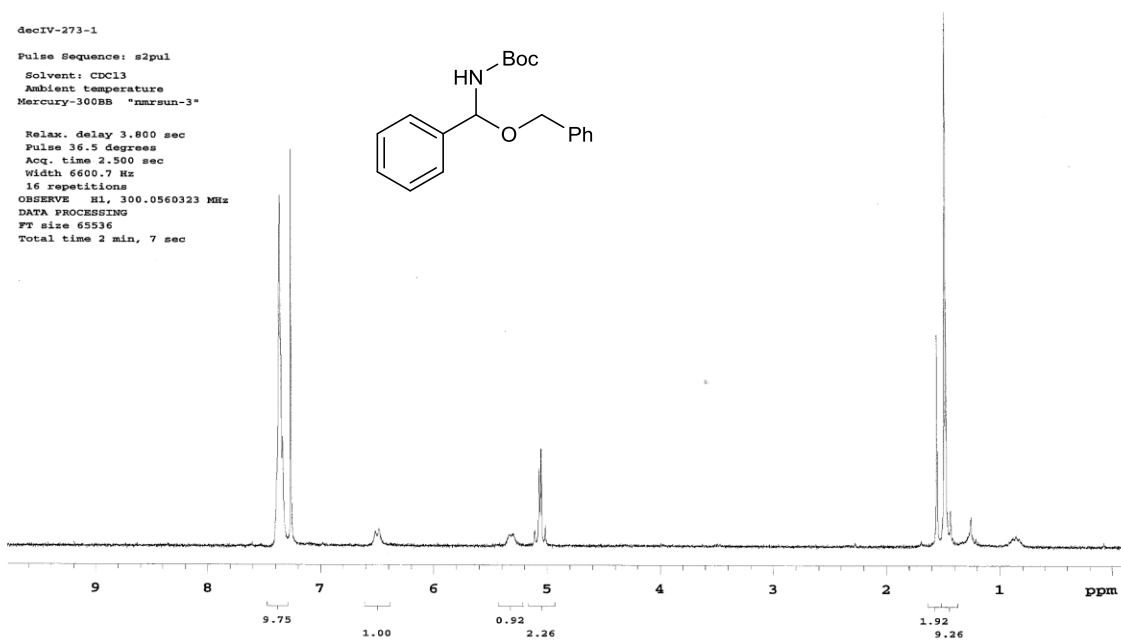

decIV-273-1  
C13CPDpl.PU CDCl3 /opt/topspin dcarrera 87

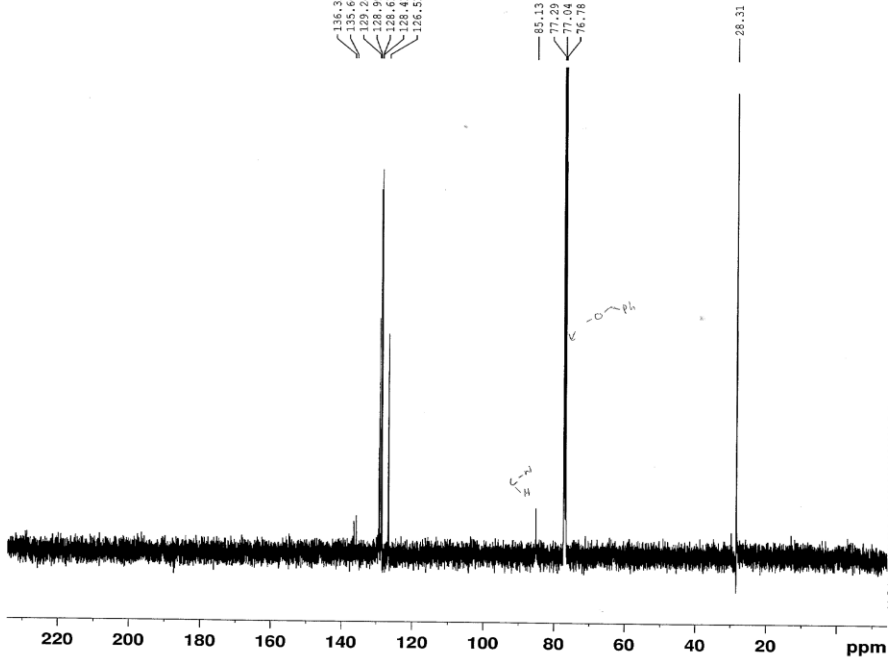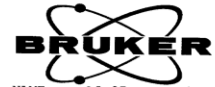

NAME A2\_87-DECIV-273  
EXPNO 10  
PROCNO 1  
Date\_ 20080531  
Time 15.01  
INSTRUM spect  
PROBHD 5 mm CPDCH 13C  
PULPROG zgpg  
TD 65536  
SOLVENT CDCl3  
NS 1024  
DS 4  
SWH 31250.000 Hz  
FIDRES 0.476837 Hz  
AQ 1.0486259 sec  
RG 1  
DW 16.000 usec  
DE 6.00 usec  
TE 295.0 K  
D1 2.0000000 sec  
D11 0.0300000 sec  
TDO 1

===== CHANNEL f1 =====  
NUC1 13C  
P1 8.20 usec  
PL1 2.50 dB  
PL1W 36.44347000 W  
SF01 125.8528493 MHz

===== CHANNEL f2 =====  
CPDPRG2 waltz16  
NUC2 1H  
PCPD2 80.00 usec  
PL2 3.80 dB  
PL12 19.92 dB  
PL13 20.00 dB  
PL2W 11.83256291 W  
PL12W 0.28912020 W  
PL13W 0.28364316 W  
SF02 500.4550018 MHz  
SI 32768  
SF 125.8390070 MHz  
WDW EM  
SSB 0  
LB 1.00 Hz  
GB 0  
FC 1.40
